# Supplementary material
Source: PubMed Central journal article supplement (PMC2529254)

# De Novo Asymmetric Syntheses of SL0101 and Its Analogues via a Palladium-Catalyzed Glycosylation

Mingde Shan and George A. O'Doherty\*

Department of Chemistry, West Virginia University

Morgantown, WV 26506

## Supporting Information

### Table of Contents:

Page

**Section A: General Information**

**Section B: Experimental Procedures**

|     |                                                                                                                                     |
|-----|-------------------------------------------------------------------------------------------------------------------------------------|
| S 5 | Experimental Procedure for ( <i>E</i> )-1-(2,4-bis(benzyloxy)-6-hydroxyphenyl)-3-(4-(benzyloxy)phenyl)prop-2-en-1-one ( <b>14</b> ) |
| S 6 | Experimental Procedure for 5,7-bis(benzyloxy)-2-(4-(benzyloxy)phenyl)-4H-chromen-4-one ( <b>15</b> )                                |
| S 6 | Experimental Procedure for 5,7-bis(benzyloxy)-2-(4-(benzyloxy)phenyl)-3-hydroxy-4H-chromen-4-one ( <b>3</b> )                       |
| S 7 | Experimental Procedure for ( <i>S</i> )-1-(furan-2-yl)ethanol ( <b>16</b> )                                                         |
| S 8 | Experimental Procedure for (2 <i>S</i> , 6 <i>R</i> )-6-hydroxy-2-methyl-2H-pyran-3(6 <i>H</i> )-one ( <b>17</b> )                  |
| S 9 | Experimental Procedure for (2 <i>S</i> , 6 <i>S</i> )- <i>t</i> -butyl -5,6-dihydro-6-methyl-5-                                     |

- oxo-2H-pyran-2-yl carbonate (**5**)
- S 10 Experimental Procedure for 3-((2*S*,6*S*)-5,6-dihydro-6-methyl-5-oxo-2H-pyran-2-yloxy)-5,7-bis(benzyloxy)-2-(4-(benzyloxy)phenyl)-4H-chromen-4-one (**2**)
- S 11 Experimental Procedure for 3-((2*S*,5*R*,6*S*)-5,6-dihydro-5-hydroxy-6-methyl-2H-pyran-2-yloxy)-5,7-bis(benzyloxy)-2-(4-(benzyloxy)phenyl)-4H-chromen-4-one (**7**)
- S 12 Experimental Procedure for 5,7-bis(benzyloxy)-2-(4-(benzyloxy)Phenyl)-3-( $\alpha$ -L-rhamnopyranosyloxy)-4H-chromen-4-one (**8**)
- S 13 Experimental Procedure for Kaempferol-3- $\alpha$ -L-rhamnoside (**1b**)
- S 14 Experimental Procedure for 5,7-bis(benzyloxy)-2-(4-(benzyloxy)phenyl)-3-(2,3,4-*O*-triacetyl- $\alpha$ -L-rhamnopyranoyloxy)-4H-chromen-4-one (**9**)
- S 15 Experimental Procedure for Kaempferol-3- $\alpha$ -L-3'',4'',5''-*O*-triacetylramnoside (**1c**)
- S 16 Experimental Procedure for 6-(5,7-bis(benzyloxy)-2-(4-(benzyloxy)phenyl)-4-oxo-4H-chromen-3-yloxy)-3,6-dihydro-2-methyl-2H-pyran-3-yl acetate (**10**)
- S 17 Experimental Procedure for 5,7-bis(benzyloxy)-2-(4-(benzyloxy)phenyl)-3-(4-*O*-acetyl- $\alpha$ -L-rhamnopyranoyloxy)-4H-chromen-4-one (**11**)
- S 18 Experimental Procedure for Kaempferol-3- $\alpha$ -L-4''-*O*-acetylramnoside (**1d**)
- S 19 Experimental Procedure for 5,7-bis(benzyloxy)-2-(4-(benzyloxy)phenyl)-3-(2,4-*O*-triacetyl- $\alpha$ -L-rhamnopyranoyloxy)-4H-

|      |                                                                                                                                                         |
|------|---------------------------------------------------------------------------------------------------------------------------------------------------------|
|      | chromen-4-one ( <b>12</b> )                                                                                                                             |
| S 20 | Experimental Procedure for Kaempferol-3- $\alpha$ -L-2'',4''-O-diacetylramnoside ( <b>1e</b> )                                                          |
| S 21 | Experimental Procedure for 5,7-bis(benzyloxy)-2-(4-(benzyloxy)phenyl)-3-(3,4-O-triacetyl- $\alpha$ -L-rhamnopyranoyloxy)-4H-chromen-4-one ( <b>13</b> ) |
| S 22 | Experimental Procedure for SL0101 ( <b>1a</b> )                                                                                                         |

**Section C:  $^1\text{H}$  and  $^{13}\text{C}$  NMR Spectra**

|         |                                                           |
|---------|-----------------------------------------------------------|
| S 24-25 | $^1\text{H}$ and $^{13}\text{C}$ NMR Spectra of <b>2</b>  |
| S 26-27 | $^1\text{H}$ and $^{13}\text{C}$ NMR Spectra of <b>7</b>  |
| S 28-29 | $^1\text{H}$ and $^{13}\text{C}$ NMR Spectra of <b>8</b>  |
| S 30-31 | $^1\text{H}$ and $^{13}\text{C}$ NMR Spectra of <b>1b</b> |
| S 32-33 | $^1\text{H}$ and $^{13}\text{C}$ NMR Spectra of <b>9</b>  |
| S 34-35 | $^1\text{H}$ and $^{13}\text{C}$ NMR Spectra of <b>1c</b> |
| S 36-37 | $^1\text{H}$ and $^{13}\text{C}$ NMR Spectra of <b>10</b> |
| S 38-39 | $^1\text{H}$ and $^{13}\text{C}$ NMR Spectra of <b>11</b> |
| S 40-41 | $^1\text{H}$ and $^{13}\text{C}$ NMR Spectra of <b>1d</b> |
| S 42-43 | $^1\text{H}$ and $^{13}\text{C}$ NMR Spectra of <b>12</b> |
| S 44-45 | $^1\text{H}$ and $^{13}\text{C}$ NMR Spectra of <b>1e</b> |
| S 46-47 | $^1\text{H}$ and $^{13}\text{C}$ NMR Spectra of <b>13</b> |
| S 48-49 | $^1\text{H}$ and $^{13}\text{C}$ NMR Spectra of <b>1a</b> |

## Section A: General Information:

General methods and materials:  $^1\text{H}$  and  $^{13}\text{C}$  spectra were recorded on Joel 270 and Varian 600 spectrometers. Chemical shifts were reported relative to internal tetramethylsilane ( $\delta$  0.00 ppm) or  $\text{CDCl}_3$  ( $\delta$  7.26 ppm) or  $\text{CD}_3\text{OD}$  ( $\delta$  4.78 ppm) or acetone- $\text{d}_6$  ( $\delta$  2.05 ppm) for  $^1\text{H}$  and  $\text{CDCl}_3$  ( $\delta$  77.0 ppm) or  $\text{CD}_3\text{OD}$  ( $\delta$  49.0 ppm) or acetone- $\text{d}_6$  ( $\delta$  29.92 ppm) for  $^{13}\text{C}$ . Optical rotations were measured with a Jasco DIP-370 digital polarimeter in the solvent specified. Infrared (IR) spectra were obtained on a prospect MIDAC FT-IR spectrometer. Flash column chromatography was performed on ICN reagent 60 (60-200 mesh) silica gel. Analytical thin-layer chromatography was performed with precoated glass-backed plates (Whatman K6F 60, F254) and visualized by quenching of fluorescence and by charring after treatment with panisaldehyde or phosphomolybdic acid or potassium permanganate stain.  $R_f$  values were obtained by elution in the stated solvent ratios (v/v). Ether, THF, methylene chloride and triethylamine were dried by passing through activated alumina (8 x 14 mesh) column with Argon gas pressure. Commercial reagents were used without purification unless otherwise noted. Air and/or moisture-sensitive reactions were carried out under an atmosphere of argon/nitrogen using oven/flamed-dried glassware and standard syringe/septa techniques.

## Section B: Experimental Procedures:

### (*E*)-1-(2,4-bis(benzyloxy)-6-hydroxyphenyl)-3-(4-(benzyloxy)phenyl)prop-2-en-1-one (**14**)

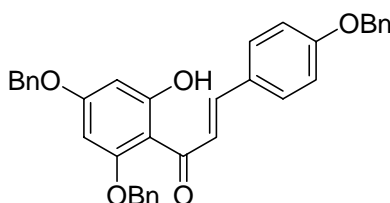

To a solution of 4.0 g 4', 5, 7-trihydroxyflavanone **6** (14.7 mmol) in 50 mL acetone was added 5.3 mL BnBr (44.4 mmol) and 12.2 g K<sub>2</sub>CO<sub>3</sub> (88.2 mmol). The reaction mixture was heated under reflux for 6 hours, then cooled down to room temperature. The mixture was concentrated under reduced pressure to give a residue which was then partitioned between 150 mL EtOAc and 80 mL H<sub>2</sub>O. The water layer was extracted by EtOAc (100 mL × 3). The organic layer was pooled, then washed by saturated brine, dried over Na<sub>2</sub>SO<sub>4</sub> and concentrated under reduced pressure to give a crude product. Recrystallization and further chromatograph for the mother liquid eluting with hexane-EtOAc (6:1) gave pure phenol **14** (6 g, 75%):<sup>1</sup> Yellow solid; *R<sub>f</sub>* = 0.51 (3:1 (v/v) hexane/EtOAc); <sup>1</sup>H NMR (CDCl<sub>3</sub>, 270 MHz) δ 7.75 (dd, *J* = 15.6, 15.3 Hz, 2H), 7.53-7.30 (m, 15H), 7.00 (d, *J* = 8.9 Hz, 2H), 6.78 (d, *J* = 8.7 Hz, 2H), 6.22 (d, *J* = 2.5 Hz, 1H), 6.17 (d, *J* = 2.5 Hz, 1H), 6.13 (d, *J* = 10.2 Hz, 1H), 5.10 (s, 2H), 5.08 (s, 2H), 5.05 (s, 2H); <sup>13</sup>C NMR (CDCl<sub>3</sub>, 67.5 MHz) δ 192.6, 168.8, 165.1, 161.7, 160.3, 142.7, 136.5, 135.9, 135.5, 130.1, 128.9, 128.8, 128.7, 128.6, 128.6, 128.5, 128.3, 128.1, 127.7, 127.4, 125.2, 115.0, 106.3, 95.0, 92.5, 71.4, 70.3, 70.0.

<sup>1</sup> These known compounds were characterized based on the comparison of <sup>1</sup>H and <sup>13</sup>C NMR data with the published ones: Maloney, D. J.; Hecht, S. M. *Org. Lett.* **2005**, 7, 1097-1099.

**5,7-bis(benzyloxy)-2-(4-(benzyloxy)phenyl)-4H-chromen-4-one (15)**

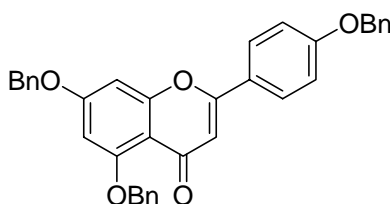

2.76 g phenol **14** (5.09 mmol) was dissolved in 6 mL dry DMSO, and a catalytic amount of I<sub>2</sub> (41 mg, 0.16 mmol) was added into the solution. The reaction mixture was heated to 110 °C and kept stirring at this temperature for 24 hours. Then it was cooled down to the room temperature. 10 mL saturated NaHCO<sub>3</sub> was added to quench the reaction. The water layer was extracted with EtOAc (30 mL × 3). The organic layer was pooled, then washed by 10 mL saturated brine, dried over Na<sub>2</sub>SO<sub>4</sub>, and concentrated the organic layer under reduced pressure to give a crude product. Chromatograph eluting with hexane-EtOAc (2:1) afforded desired flavone **15** (2.10 g, 76%): Yellow solid; *R<sub>f</sub>* = 0.20 (2:1 (v/v) Hexane/EtOAc); <sup>1</sup>H NMR (CDCl<sub>3</sub>, 600 MHz) δ 7.81 (d, *J* = 8.4 Hz, 2H), 7.62 (d, *J* = 8.4 Hz, 2H), 7.46-7.28 (m, 13H), 7.07 (d, *J* = 8.4 Hz, 2H), 6.64 (d, *J* = 1.8 Hz, 1H), 6.58 (s, 1H), 6.49 (d, *J* = 2.4 Hz, 1H), 5.23 (s, 2H), 5.14 (s, 2H), 5.11 (s, 2H); <sup>13</sup>C NMR (CDCl<sub>3</sub>, 67.5 MHz) δ 177.3, 162.8, 161.1, 160.6, 159.6, 136.4, 136.2, 135.7, 128.7, 128.6, 128.5, 128.4, 128.2, 127.6, 127.4, 126.5, 124.0, 118.0, 115.2, 109.7, 107.7, 98.3, 94.2, 70.7, 70.4, 70.1.

**5,7-bis(benzyloxy)-2-(4-(benzyloxy)phenyl)-3-hydroxy-4H-chromen-4-one (3)**

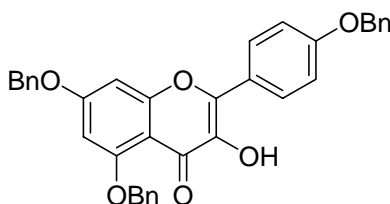

150 mL solution of freshly generated DMDO in acetone (~ 0.1 M) was dried by 3 Å MS at -20 °C under the protection of argon, and into this solution was added a solution

of 2.3 g flavone **15** (4.26 mmol) in 20 mL dry CH<sub>2</sub>Cl<sub>2</sub> at this temperature via a cannula. Then allow it warm up to 0 °C and keep stirring at 0 °C overnight. The solvent was evaporated under reduced pressure to give brown-yellowish solid, which was then redissolved in 20 mL CH<sub>2</sub>Cl<sub>2</sub>. Into this solution was added 2 mg TsOH·H<sub>2</sub>O and it was then kept stirring at room temperature for 1 hour. The reaction mixture was concentrated under reduced pressure to a residue, which was then subjected to chromatograph. Elution with hexane-EtOAc (5:1) gave perbenzylated flavonol **3** (1.2 g, 50%) and elution with hexane-EtOAc (2:1) recovered 0.7 g starting material. Perbenzylated flavonol **3**: Yellow solid; *R<sub>f</sub>* = 0.35 (3:1 (v/v) Hexane/EtOAc); <sup>1</sup>H NMR (CDCl<sub>3</sub>, 600 MHz) δ 8.17 (d, *J* = 9.6 Hz, 2H), 7.61 (d, *J* = 7.2 Hz, 2H), 7.47-7.30 (m, 13H), 7.10 (d, *J* = 9.0 Hz, 2H), 6.64 (d, *J* = 1.8 Hz, 1H), 6.49 (d, *J* = 1.8 Hz, 1H), 5.24 (s, 2H), 5.15 (s, 2H), 5.12 (s, 2H); <sup>13</sup>C NMR (CDCl<sub>3</sub>, 67.5 MHz) δ 171.8, 163.2, 159.8, 159.4, 158.7, 142.2, 137.6, 136.5, 136.2, 135.6, 128.9, 128.8, 128.6, 128.5, 128.1, 127.8, 127.6, 127.5, 126.7, 123.8, 114.9, 106.8, 97.6, 93.7, 70.7, 70.6, 70.0.

**(*S*)-1-(furan-2-yl)ethanol (**16**)<sup>2</sup>**

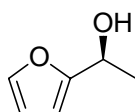

To a solution of 15 g acylfuran **5** (136.4 mmol) in 20 mL CH<sub>2</sub>Cl<sub>2</sub> was added a prepared solution of formic acid/triethylamine (40 mL, 2:1(mol/mol)) and Noyori asymmetric transfer hydrogenation catalyst (*R*)-Ru(*η*<sup>6</sup>-mesitylene)-(*S*, *S*)-TsDPEN (0.2 g, 0.25 mol%). The resulting solution was stirred at room temperature for 24 h. Then it was diluted with water (90 mL) and extracted with Et<sub>2</sub>O (200 mL x 3). The

<sup>2</sup> Ohkuma, T.; Koizumi, M.; Yoshida, M.; Noyori R. *Org. Lett.*, **2000**, 2, 1749-1751.

pooled organic layer was washed with 50 mL saturated NaHCO<sub>3</sub>, 50 mL saturated brine, dried over Na<sub>2</sub>SO<sub>4</sub> and then concentrated under reduced pressure to give a residue. Flush chromatograph on silica gel eluting with hexane-Et<sub>2</sub>O (1:1) gave furan alcohol **16** (14 g, 92%):<sup>3</sup> Colorless oil; *R<sub>f</sub>* = 0.45 (7:3 (v/v) Hexane/EtOAc); [ $\alpha$ ]<sub>D</sub><sup>25</sup> = +21° (c = 1.0, CH<sub>2</sub>Cl<sub>2</sub>); <sup>1</sup>H NMR (600 MHz CDCl<sub>3</sub>)  $\delta$  7.30 (d, *J* = 1.8, 1H), 6.26 (dd, *J* = 3.0, 1.8 Hz, 1H), 6.15 (d, *J* = 3.0, 1H), 4.78 (dq, *J* = 6.6, 6.6 Hz, 1H), 3.11 (s, 1H), 1.46 (d, *J* = 6.6 Hz, 3H); <sup>13</sup>C NMR (150 MHz, CDCl<sub>3</sub>)  $\delta$  157.7, 141.6, 109.9, 104.9, 63.3, 21.1.

**(2*S*, 6*R*)-6-hydroxy-2-methyl-2H-pyran-3(6H)-one (17)**

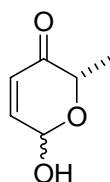

To a solution of 14 g furan alcohol **16** (125 mmol) in 416 mL THF-H<sub>2</sub>O (3:1) was added 21 g NaHCO<sub>3</sub> (250 mmol), 17 g NaOAc•3H<sub>2</sub>O (125 mmol), and 22.3 g NBS (125 mmol) at 0 °C. The reaction mixture was kept stirring at this temperature for 1 hour, then at 0 °C 200 mL saturated NaHCO<sub>3</sub> was added to quench the reaction. The reaction mixture was directly extracted with Et<sub>2</sub>O (300 mL × 3) and the organic layer was pooled, washed by 100 mL saturated brine, dried over Na<sub>2</sub>SO<sub>4</sub> and then concentrated reduced pressure to give a residue, which was rapidly subjected to flush chromatography on silica gel. Elution with hexane-EtOAc (1:1) afforded pyranone alcohol **17** (14.4 g, 90 %): White solid; *R<sub>f</sub>* = 0.25 (7:3 (v/v) hexane/EtOAc); [ $\alpha$ ]<sub>D</sub><sup>25</sup> = +44° (c = 1.0, CH<sub>2</sub>Cl<sub>2</sub>); <sup>1</sup>H NMR (600 MHz, CDCl<sub>3</sub>) major isomer  $\delta$  6.82 (dd, *J* = 10.2, 3.0 Hz, 1H), 5.96 (d, *J* = 10.2, 1H), 5.48 (d, *J* = 3.0 Hz, 1H), 3.99 (q, *J* = 7.2 Hz,

<sup>3</sup> These known compounds were characterized based on the comparison with authentic sample that our group prepared before: (a) Guo, H.; O'Doherty, G. A. *Org. Lett.* **2005**, 7, 3921-3924. (b) Li, M.; Scott, J. G.; O'Doherty, G. A. *Tetrahedron Lett.* **2004**, 45, 1005-1009.

1H), 1.23 (d,  $J = 7.2$  Hz, 3H);  $^{13}\text{C}$  NMR (150 MHz,  $\text{CDCl}_3$ ) major isomer  $\delta$  197.6, 145.3, 126.6, 87.2, 74.8, 15.1.

**(2*S*,6*S*)-*t*-butyl -5,6-dihydro-6-methyl-5-oxo-2H-pyran-2-yl carbonate (**5**)**

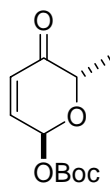

To a solution of 7.4 g pyranone alcohol **17** (57.8 mmol) in 80 mL  $\text{CH}_2\text{Cl}_2$  was added 528 mg DMAP (4.33 mmol) at  $-78^\circ\text{C}$ . A pre-cooled solution of 25.2 g  $(\text{Boc})_2\text{O}$  (115.6 mmol) in 30 mL  $\text{CH}_2\text{Cl}_2$  was dropwised into the reaction mixture via a cannula. The reaction mixture was stirred at  $-78^\circ\text{C}$  for 12 hours. The reaction was quenched by 100 mL saturated  $\text{NaHCO}_3$  and then extracted with  $\text{Et}_2\text{O}$  (300 mL  $\times$  3). The organic layers were pooled, then washed by 70 mL saturated  $\text{NaCl}$ , dried over  $\text{Na}_2\text{SO}_4$  and concentrated under reduced pressure to give a residue. Flash chromatograph on silica gel eluting with hexane- $\text{Et}_2\text{O}$  (100:7) gave Boc protected  $\alpha$ -pyranone **5** (7.8 g, 60%). Elution with hexane- $\text{Et}_2\text{O}$  (10:1) gave  $\beta$ -isomer (2.5g, 19%).  $\alpha$ -pyranone **5**:  $R_f = 0.60$  (7:3 (v/v) hexane/ $\text{EtOAc}$ );  $[\alpha]_{\text{D}}^{25} = +98^\circ$  ( $c = 1.0$ ,  $\text{CH}_2\text{Cl}_2$ );  $^1\text{H}$  NMR (600 MHz,  $\text{CDCl}_3$ )  $\delta$  6.78 (dd,  $J = 10.2, 3.6$  Hz, 1H), 6.22 (d,  $J = 3.6$  Hz, 1H), 6.09 (d,  $J = 10.2$  Hz, 1H), 4.53 (q,  $J = 6.6$  Hz, 1H), 1.40 (s, 9H), 1.28 (d,  $J = 6.6$  Hz, 3H);  $^{13}\text{C}$  NMR (150.8 MHz,  $\text{CDCl}_3$ )  $\delta$  195.5, 151.7, 140.9, 128.2, 89.1, 83.3, 72.0, 27.5, 15.1;

**3-((2*S*,6*S*)-5,6-dihydro-6-methyl-5-oxo-2H-pyran-2-yloxy)-5,7-bis(benzyloxy)-2-(4-(benzyloxy)phenyl)-4H-chromen-4-one (2)**

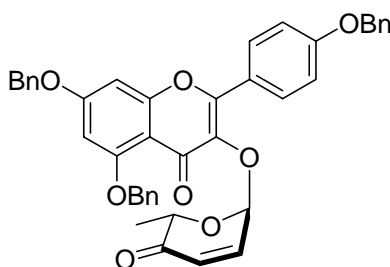

To a solution of 875 mg perbenzylated flavonol **3** (1.6 mmol) and 537 mg pyranone **4** (2.4 mmol) in 8 mL CH<sub>2</sub>Cl<sub>2</sub> was added a solution of 41 mg Pd<sub>2</sub>(DBA)<sub>3</sub>·CHCl<sub>3</sub> (0.04 mmol) and 41 mg PPh<sub>3</sub> (0.16 mmol) in 1 mL CH<sub>2</sub>Cl<sub>2</sub> at 0 °C. The reaction mixture was stirred at 0 °C for 3 hours and then quenched by 15 mL saturated NaHCO<sub>3</sub>, followed by extraction with Et<sub>2</sub>O (25 mL × 3). The organic layer was pooled, then washed by 15 mL saturated NaCl, dried over Na<sub>2</sub>SO<sub>4</sub> and concentrated under reduced pressure to give crude product. Chromatograph on silica gel, eluting with hexane-EtOAc (3:1) gave glycosylated pyranone **2** (888 mg, 85%): Yellow solid, mp: 75-77 °C; *R*<sub>f</sub> = 0.50 (2:1 (v/v) hexane/EtOAc); [α]<sub>D</sub><sup>25</sup> -63° (*c* 0.93, CHCl<sub>3</sub>); IR (thin film, cm<sup>-1</sup>) 3063, 2921, 1699, 1636, 1607, 1574, 1509, 1454, 1375, 1355, 1300, 1252, 1198, 1178, 1162, 1103, 1013, 937. <sup>1</sup>H NMR (CDCl<sub>3</sub>, 600 MHz) δ 7.87 (d, *J* = 8.4 Hz, 2H), 7.57 (d, *J* = 7.8 Hz, 2H), 7.46-7.29 (m, 13H), 7.27 (dd, *J* = 10.2, 3.6 Hz, 1H), 7.06 (d, *J* = 9.0 Hz, 2H), 6.58 (d, *J* = 1.8 Hz, 1H), 6.47 (d, *J* = 1.8 Hz, 1H), 6.13 (d, *J* = 10.2 Hz, 1H), 5.92 (d, *J* = 3.6 Hz, 1H), 5.27 (s, 2H), 5.15 (s, 2H), 5.08 (d, *J* = 12 Hz, 2H), 4.02 (q, *J* = 6.0 Hz, 1H), 0.93 (d, *J* = 6.6 Hz, 3H); <sup>13</sup>C NMR (CDCl<sub>3</sub>, 150 MHz) δ 196.7, 173.3, 163.0, 160.4, 159.8, 159.0, 154.9, 143.1, 137.6, 136.3, 136.2, 135.6, 130.4, 128.8, 128.7, 128.6, 128.4, 128.2, 127.7, 127.6, 127.4, 126.6, 123.2, 114.7, 109.9, 98.3, 94.3, 94.0, 71.5, 70.8, 70.5, 70.1, 14.6; HRMS (CI): calcd. for [C<sub>42</sub>H<sub>34</sub>O<sub>8</sub> + Na]<sup>+</sup>: 689.2146, Found: 689.2153.

**3-((2*S*,5*R*,6*S*)-5,6-dihydro-5-hydroxy-6-methyl-2H-pyran-2-yloxy)-5,7-bis(benzyloxy)-2-(4-(benzyloxy)phenyl)-4H-chromen-4-one (7)**

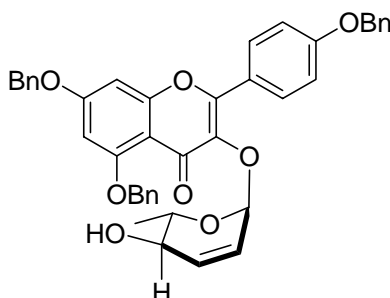

A solution of 87 mg pyranone **2** (0.13 mmol) in 3.5 mL CH<sub>2</sub>Cl<sub>2</sub>-MeOH (5:1) was cooled down to -78 °C, then 10 mg NaBH<sub>4</sub> (0.26 mmol) was added in. The reaction mixture was kept stirring at -78 °C for 3 hours. The reaction was then quenched by 2 mL saturated NaHCO<sub>3</sub>, followed by extraction with Et<sub>2</sub>O (10 mL × 3). The organic layer was washed by 2 mL saturated NaCl, dried over Na<sub>2</sub>SO<sub>4</sub>, and concentrated under reduced pressure to give crude product. Crude <sup>1</sup>H-NMR showed a dr > 20:1. Chromatograph on silica gel eluting with hexane-EtOAc (2:1) gave allylic alcohol **7** (63 mg, 73%): Amorphous yellow solid; *R*<sub>f</sub> = 0.29 (1:1 (v/v) hexane/EtOAc); [*α*]<sub>D</sub><sup>25</sup> - 83° (*c* 0.85, CHCl<sub>3</sub>); IR (thin film, cm<sup>-1</sup>) 3361, 2927, 1604, 1509, 1453, 1354, 1298, 1251, 1176, 1098, 1013, 916; <sup>1</sup>H NMR (CDCl<sub>3</sub>, 600 MHz) δ 7.95 (d, *J* = 8.4 Hz, 2H), 7.55 (d, *J* = 7.8 Hz, 2H), 7.45-7.27 (m, 13H), 7.06 (d, *J* = 9.0 Hz, 2H), 6.56 (d, *J* = 2.4 Hz, 1H), 6.44 (d, *J* = 2.4 Hz, 1H), 6.20 (ddd, *J* = 10.2, 2.4, 2.4 Hz, 1H), 5.97 (d, *J* = 10.2 Hz, 1H), 5.60 (s, 1H), 5.26 (s, 2H), 5.15 (s, 2H), 5.07 (d, *J* = 12 Hz, 2H), 3.74 (dd, *J* = 7.2, 6.6 Hz, 1H), 3.31 (dq, *J* = 8.4, 6.0 Hz, 1H), 0.71 (d, *J* = 6.6 Hz, 3H); <sup>13</sup>C NMR (CDCl<sub>3</sub>, 67.5 MHz) δ 173.8, 162.8, 160.3, 159.9, 159.0, 154.8, 138.3, 136.5, 136.4, 135.7, 133.9, 130.7, 128.8, 128.7, 128.6, 128.5, 128.2, 127.8, 127.7, 127.5, 126.7, 126.6, 123.8, 114.6, 110.2, 98.3, 95.7, 94.0, 70.8, 70.5, 70.1, 69.6, 69.4, 17.0; HRMS (CI): calcd. for [C<sub>42</sub>H<sub>36</sub>O<sub>8</sub> + Na]<sup>+</sup>: 691.2302, Found: 691.2296.

**5,7-bis(benzyloxy)-2-(4-(benzyloxy)phenyl)-3-( $\alpha$ -L-rhamnopyranosyloxy)-4H-chromen-4-one (8)**

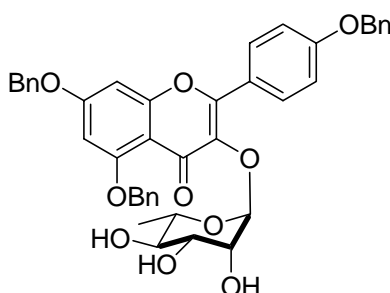

A solution of 80 mg allylic alcohol **7** (0.12 mmol) in 2 mL acetone-*t*-BuOH (1:1) was cooled down to 0 °C. To the solution was added 0.5 mL NMO-H<sub>2</sub>O (w/w 1:1), and then catalytic amount of crystalline OsO<sub>4</sub> was added into the mixture when stirring. The reaction mixture was kept stirring at 0 °C for 3 hours. The reaction mixture was then quenched by 0.5 mL saturated Na<sub>2</sub>S<sub>2</sub>O<sub>3</sub>. After stirring for another 5 hours, all the stuff was passed through a small pad of celite and silica gel, washed by EtOAc-MeOH (1:1) (10 mL × 3). The organic effluent was dried by Na<sub>2</sub>SO<sub>4</sub>, and concentrated under reduced pressure to give crude product. Chromatograph on silica gel eluting with Et<sub>2</sub>O-MeOH (20:1) gave triol **8** (80 mg, 96%): White solid, mp: 105-107 °C; *R*<sub>f</sub> = 0.56 (10:1 (v/v) Et<sub>2</sub>O/MeOH); [ $\alpha$ ]<sub>D</sub><sup>25</sup> -112° (*c* 1.3, MeOH); IR (thin film, cm<sup>-1</sup>) 3418 (broad), 2924, 1606, 1506, 1453, 1354, 1299, 1255, 1177, 1141, 1102, 1058, 998, 953; <sup>1</sup>H NMR (acetone-*d*<sub>6</sub>, 600 MHz)  $\delta$  7.91 (d, *J* = 9.0 Hz, 2H), 7.68 (d, *J* = 7.8 Hz, 2H), 7.50 (d, *J* = 7.8 Hz, 4H) 7.43-39 (m, 6H), 7.38-7.29 (m, 3H), 7.19 (d, *J* = 8.4 Hz, 2H), 6.80 (d, *J* = 1.8 Hz, 1H), 6.67 (d, *J* = 2.4 Hz, 1H), 5.57 (d, *J* = 1.8 Hz, 1H), 5.29 (d, *J* = 13.2 Hz, 1H), 5.28 (d, *J* = 13.2 Hz, 1H), 5.24 (s, 2H), 5.23(s, 2H), 4.28 (dd, *J* = 3.6, 1.8 Hz, 1H), 3.70 (dd, *J* = 9.0, 3.6 Hz, 1H), 3.33 (dd, *J* = 9.6, 9.6 Hz, 1H), 3.21 (dq, *J* = 9.6, 6.0 Hz, 1H), 2.91 (brs, 1H), 0.87 (d, *J* = 6.0 Hz, 3H); <sup>13</sup>C NMR (acetone-*d*<sub>6</sub>, 150 MHz)  $\delta$  173.5, 164.1, 161.5, 160.8, 159.8, 154.8, 138.4, 138.1, 138.0, 137.4, 131.4, 129.5, 129.4, 129.3, 129.1, 128.9, 128.7, 128.5, 128.4, 127.9, 124.4, 115.7,

110.6, 102.2, 98.9, 95.1, 73.2, 72.2, 71.5, 71.4, 71.3, 71.2, 70.8, 17.9; HRMS (ESI) calcd for  $[C_{42}H_{38}O_{10} + H]^+$ : 703.2543, Found: 703.2537.

### Kaempferol-3- $\alpha$ -L-rhamnoside (**1b**)

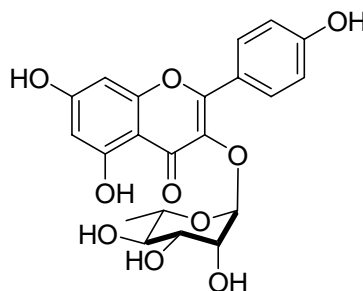

A solution of 50 mg triol **8** (0.07 mmol) in 2 mL THF-EtOH (1:1) was added 20 mg Pearlman's catalyst (Pd-C, 10%). The solution was degassed using vacuum at -90 °C and refilling with H<sub>2</sub>. This procedure was repeated three times, then the bath was removed. The reaction was warmed up to room temperature and stirred under a H<sub>2</sub> atmosphere for 3 hours. The reaction mixture was loaded onto silica gel and elution with Et<sub>2</sub>O-MeOH (20:1) gave kaempferol-3- $\alpha$ -L-rhamnoside (**1b**) (24mg, 80%):<sup>4</sup> Pale yellow solid, mp: 140-142 °C;  $R_f$  = 0.71 (5:1 (v/v) Et<sub>2</sub>O/MeOH);  $[\alpha]_D^{25}$  -96° ( $c$  1.3, MeOH); IR (thin film, cm<sup>-1</sup>) 3259 (broad), 2924, 2855, 1653, 1607, 1442, 1360, 1251, 1207, 1172, 1057, 996; <sup>1</sup>H NMR (CD<sub>3</sub>OD, 600 MHz)  $\delta$  7.72 (d,  $J$  = 8.4 Hz, 2H), 6.89 (d,  $J$  = 9.0 Hz, 2H), 6.30 (d,  $J$  = 2.4 Hz, 1H), 6.13 (d,  $J$  = 1.8 Hz, 1H), 5.33 (d,  $J$  = 1.8 Hz, 1H), 4.18 (dd,  $J$  = 3.0, 1.8 Hz, 1H), 3.67 (dd,  $J$  = 9.0, 2.4 Hz, 1H), 3.30-3.27 (m, 4H), 0.88 (d,  $J$  = 6.0 Hz, 3H); <sup>13</sup>C NMR (CD<sub>3</sub>OD, 150 MHz)  $\delta$  179.5, 163.2, 161.6, 159.1, 158.7, 136.1, 131.9, 122.7, 116.6, 105.5, 103.5, 100.4, 95.2, 73.2, 72.2, 72.2, 71.9, 17.6; HRMS (ESI) calcd for  $[C_{21}H_{20}O_{10} + Na]^+$ : 455.0954, Found: 455.0949.

<sup>4</sup> (a) Matthes, H. W. D.; Luu, B.; Ourisson, G. *Phytochemistry* **1980**, *19*, 2643-2650. (b) Kaouadji, M. *Phytochemistry* **1990**, *29*, 2295-2297. (c) Masuda, T.; Jitoe, A.; Kato, S.; Nakatani, N. *Phytochemistry* **1991**, *30*, 2391-2392. (d) Deng, J.-Z.; Marshall, R.; Jones, S. H.; Johnson, R. K.; Hecht, S. M. *J. Nat. Prod.* **2002**, *65*, 1930-1932.

**5,7-bis(benzyloxy)-2-(4-(benzyloxy)phenyl)-3-(2,3,4-*O*-triacetyl- $\alpha$ -L-rhamnopyranoyloxy)-4H-chromen-4-one (9)**

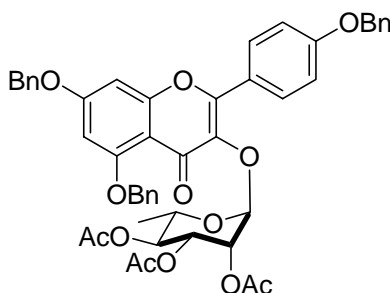

A solution of 63 mg triol **8** (0.09 mmol) in 2.5 mL CH<sub>2</sub>Cl<sub>2</sub> was cooled down to 0 °C, then sequentially 0.4 mL pyridine, catalytic amount of DMAP and 0.4 mL Ac<sub>2</sub>O were added. The reaction mixture was stirred at 0 °C overnight. The reaction mixture was diluted by 15 mL Et<sub>2</sub>O and then the reaction was quenched by 1.5 mL H<sub>2</sub>O, the organic layer was washed by 2 mL saturated NaHCO<sub>3</sub>, 2 mL saturated NaCl, dried over Na<sub>2</sub>SO<sub>4</sub>, and concentrated under reduced pressure to give a residue which was subjected to chromatograph on silica gel. Elution with hexane-EtOAc (2:1) afforded triacetate **9** (63 mg, 86%): White solid, mp: 90-92 °C; *R<sub>f</sub>* = 0.58 (1:1 (v/v) hexane/EtOAc); [ $\alpha$ ]<sub>D</sub><sup>25</sup> -175° (*c* 1.3, CHCl<sub>3</sub>); IR (thin film, cm<sup>-1</sup>) 3035, 2982, 2938, 1746, 1632, 1605, 1574, 1509, 1498, 1486, 1453, 1432, 1368, 1298, 1247, 1217, 1174, 1136, 1101, 1044, 1019, 968; <sup>1</sup>H NMR (CDCl<sub>3</sub>, 600 MHz)  $\delta$  7.86 (d, *J* = 9.0 Hz, 2H), 7.56 (d, *J* = 7.2 Hz, 2H), 7.46-7.27 (m, 13H), 7.14 (d, *J* = 9.0 Hz, 2H), 6.56 (d, *J* = 2.4 Hz, 1H), 6.45 (d, *J* = 2.4 Hz, 1H), 5.73 (d, *J* = 1.8 Hz, 1H), 5.72 (dd, *J* = 3.6, 1.8 Hz, 1H), 5.32 (dd, *J* = 10.2, 3.0 Hz, 1H), 5.26 (s, 2H), 5.15 (s, 2H), 5.08 (s, 2H), 4.92 (dd, *J* = 10.2, 9.6 Hz, 1H), 3.37 (dq, *J* = 10.2, 6.6 Hz, 1H), 2.11 (s, 3H), 1.99 (s, 3H), 1.96 (s, 3H), 0.85 (d, *J* = 6.0 Hz, 3H); <sup>13</sup>C NMR (CDCl<sub>3</sub>, 150 MHz)  $\delta$  172.9, 169.9, 169.8, 169.5, 162.9, 160.6, 159.9, 158.8, 154.2, 136.5, 136.4, 136.3, 135.6, 130.4, 128.8, 128.7, 128.6, 128.4, 128.2, 127.7, 127.5, 127.4, 126.6, 123.1, 114.9, 110.1, 98.4, 97.9,

94.0, 70.8, 70.7, 70.5, 70.2, 69.3, 69.1, 68.1, 20.9, 20.8, 20.7, 17.1; HRMS (ESI) calcd for  $[C_{48}H_{44}O_{13} + Na]^+$ : 851.2679, Found: 851.2678.

**Kaempferol-3- $\alpha$ -L-3'',4'',5''-O-triacetylramnoside (1c)**

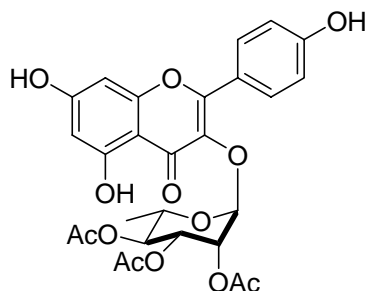

To a solution of 60 mg triacetate **9** (0.07 mmol) in 3 mL THF-EtOH (1:1) was added 30 mg Pearlman's catalyst (Pd-C, 10%). The reaction mixture was degassed using vacuum at -90 °C and refilling with H<sub>2</sub>. This procedure was repeated three times, then the bath was removed and the reaction was warmed up to room temperature. The reaction mixture was stirred under a H<sub>2</sub> atmosphere for 3 hours. The reaction mixture was loaded onto silica gel and elution with hexane-EtOAc (1:1) gave kaempferol-3- $\alpha$ -L-3'',4'',5''-O-triacetylramnoside (**1c**) (35 mg, 86%).<sup>5</sup> Yellow solid, mp: 152-154 °C;  $R_f$  = 0.42 (1:2 (v/v) hexane/EtOAc);  $[\alpha]_D^{25}$  -128° ( $c$  1.4, CHCl<sub>3</sub>); IR (thin film, cm<sup>-1</sup>) 3372 (broad), 2982, 1749, 1654, 1609, 1504, 1364, 1207, 1174, 1085, 1043, 971; <sup>1</sup>H NMR (CDCl<sub>3</sub>, 600 MHz)  $\delta$  12.5 (s, 1H), 7.77 (d,  $J$  = 9.0 Hz, 2H), 6.98 (d,  $J$  = 8.4 Hz, 2H), 6.35 (d,  $J$  = 1.8 Hz, 1H), 6.25 (d,  $J$  = 2.4 Hz, 1H), 5.62 (dd,  $J$  = 3.6, 1.8 Hz, 1H), 5.55 (d,  $J$  = 1.8 Hz, 1H), 5.32 (dd,  $J$  = 10.2, 3.6 Hz, 1H), 4.97 (dd,  $J$  = 10.2, 9.6 Hz, 1H), 3.54 (dq,  $J$  = 10.2, 6.0 Hz, 1H), 2.13 (s, 3H), 2.02 (s, 3H), 2.01 (s, 3H), 0.94 (d,  $J$  = 6.6 Hz, 3H); <sup>13</sup>C NMR (CDCl<sub>3</sub>, 150 MHz)  $\delta$  177.9, 170.8, 170.3, 170.1, 162.5, 162.1, 158.6, 157.4, 156.9, 134.1, 130.7, 122.1, 115.7, 105.7, 99.3, 98.2, 94.1, 70.4,

<sup>5</sup> Usia, T.; Iwata, H.; Hiratsuka, A.; Watabe, T.; Kadota, S.; Tezuka, Y. *J. Nat. Prod.* **2004**, 67, 1079-1083.

69.4, 69.2, 68.4, 20.9, 20.8, 20.7, 17.1; HRMS (ESI) calcd for  $[C_{27}H_{26}O_{13} + Na]^+$ : 581.1271, Found: 581.1266.

**6-(5,7-bis(benzyloxy)-2-(4-(benzyloxy)phenyl)-4-oxo-4H-chromen-3-yloxy)-3,6-dihydro-2-methyl-2H-pyran-3-yl acetate (10)**

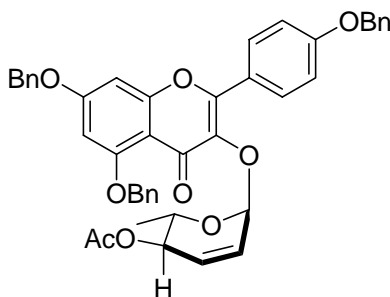

A solution of 210 mg pyranone **2** (0.32 mmol) in 3.5 mL  $CH_2Cl_2$ -MeOH (5:1) was cooled down to  $-78\text{ }^{\circ}C$ , then 25 mg  $NaBH_4$  (0.64 mmol) was added. The reaction mixture was stirred at  $-78\text{ }^{\circ}C$  for 3 hours. Then the reaction was quenched by 3 mL saturated  $NaHCO_3$ , followed by extraction with  $Et_2O$  (15 mL  $\times$  3). The organic layer was washed by 3 mL saturated  $NaCl$ , dried over  $Na_2SO_4$ , and concentrated under reduced pressure to give a residue. All residual solvent was removed by applying a high vacuum produced by oil pump for half an hour. The dry residue was redissolved in  $CH_2Cl_2$  and cooled down to  $0\text{ }^{\circ}C$ . To the solution was added 0.4 mL pyridine, catalytic amount of DMAP, and 0.3 mL  $Ac_2O$ . After stirring for 1 hour, the mixture was diluted by 20 mL  $Et_2O$ . The organic layer was sequentially washed with 2 mL  $H_2O$ , 2 mL saturated  $NaHCO_3$ , 2 mL saturated brine, dried over  $Na_2SO_4$  and then concentrated under reduced pressure to afford crude product. Chromatograph on silica gel eluting with hexane-EtOAc (5:1) gave pure acetate **10** (156 mg, 70%): Amorphous yellow solid;  $R_f = 0.52$  (3:2 (v/v) hexane/EtOAc);  $[\alpha]_D^{25} -146^{\circ}$  ( $c$  1.1,  $CHCl_3$ ); IR (thin film,  $cm^{-1}$ ) 3052, 2927, 1736, 1636, 1608, 1509, 1454, 1375, 1355, 1298, 1240, 1178, 1104, 1023, 936;  $^1H$  NMR ( $CDCl_3$ , 600 MHz)  $\delta$  7.96 (d,  $J = 9.0$  Hz,

2H), 7.55 (d,  $J = 7.2$  Hz, 2H), 7.47-7.27 (m, 13H), 7.09 (d,  $J = 8.4$  Hz, 2H), 6.56 (d,  $J = 2.4$  Hz, 1H), 6.44 (d,  $J = 2.4$  Hz, 1H), 6.20 (ddd,  $J = 10.2, 2.4, 2.4$  Hz, 1H), 5.90 (d,  $J = 10.2$  Hz, 1H), 5.60 (brs, 1H), 5.27 (s, 2H), 5.17 (s, 2H), 5.08 (d,  $J = 11.4$  Hz, 1H), 5.07 (d,  $J = 11.4$  Hz, 1H), 4.96 (ddd,  $J = 9.6, 1.8, 1.8$  Hz, 1H), 3.60 (dq,  $J = 9.6, 6.6$  Hz, 1H), 2.08 (s, 3H), 0.61 (d,  $J = 6.0$  Hz, 3H);  $^{13}\text{C}$  NMR ( $\text{CDCl}_3$ , 150 MHz)  $\delta$  173.5, 170.3, 162.8, 160.2, 159.8, 154.5, 138.4, 136.5, 136.4, 135.7, 130.6, 130.3, 128.7, 128.6, 128.6, 128.5, 128.4, 128.1, 127.6, 127.5, 127.3, 126.6, 123.8, 114.5, 110.0, 98.2, 95.8, 94.0, 70.8, 70.7, 70.4, 70.1, 66.5, 21.1, 17.0; HRMS (CI): calcd. for  $[\text{C}_{44}\text{H}_{38}\text{O}_9 + \text{Na}]^+$ : 733.2408, Found: 733.2405.

**5,7-bis(benzyloxy)-2-(4-(benzyloxy)phenyl)-3-(4-*O*-acetyl- $\alpha$ -L-rhamnopyranoyloxy)-4H-chromen-4-one (11)**

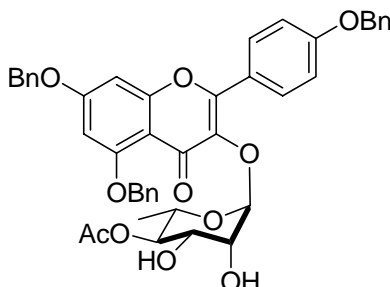

A solution of 142 mg acetate (**10**) (0.20 mmol) in 3 mL acetone-*t*-BuOH (1:1) was cooled down to 0 °C. To the solution was added 1 mL NMO- $\text{H}_2\text{O}$  (w/w 1:1), and a catalytic amount ( $\sim 5$  mg) of crystalline  $\text{OsO}_4$  was added into the mixture. The reaction mixture was stirred at 0 °C for 24 hours. The reaction was quenched with 1 mL saturated  $\text{Na}_2\text{S}_2\text{O}_3$  (aq.) and stirred overnight. Then the mixture was passed through a small pad of celite and silica gel, washed with EtOAc-MeOH (1:1) (15 mL  $\times$  3), the organic solution was dried over  $\text{Na}_2\text{SO}_4$ , and concentrated under reduced pressure to give a residue. Chromatograph on silica gel eluting with hexane-EtOAc (2:3) gave diol **11** (115 mg, 77%): Pale yellow solid, mp: 90.5-92.5 °C;  $R_f = 0.67$

(10:1 (v/v) Et<sub>2</sub>O/MeOH); [ $\alpha$ ]<sub>D</sub><sup>25</sup> -116 (*c* 0.8, CHCl<sub>3</sub>); IR (thin film, cm<sup>-1</sup>) 3424 (broad), 3066, 3035, 2928, 1741, 1605, 1574, 1509, 1498, 1486, 1454, 1375, 1354, 1299, 1251, 1199, 1177, 1144, 1102, 1049, 1004, 955; <sup>1</sup>H NMR (acetone-d<sub>6</sub>, 600 MHz)  $\delta$  7.82 (d, *J* = 9.0 Hz, 2H), 7.53 (d, *J* = 7.8 Hz, 2H), 7.46-7.27 (m, 13H), 7.09 (d, *J* = 9.0 Hz, 2H), 6.55 (d, *J* = 2.4 Hz, 1H), 6.45 (d, *J* = 2.4 Hz, 1H), 5.51 (d, *J* = 1.8 Hz, 1H), 5.27 (s, 2H), 5.15 (s, 2H), 5.07 (s, 2H), 4.78 (dd, *J* = 9.6, 9.0 Hz, 1H), 4.51 (ddd, *J* = 3.6, 3.6, 2.4 Hz, 1H), 3.93 (ddd, *J* = 8.4, 7.8, 3.0 Hz, 1H), 3.45 (d, *J* = 4.2 Hz, 1H), 3.40 (dq, *J* = 9.6, 6.6 Hz, 1H), 2.91 (d, *J* = 7.8 Hz, 1H), 2.05 (s, 3H), 0.81 (d, *J* = 6.6 Hz, 3H); <sup>13</sup>C NMR (acetone-d<sub>6</sub>, 150 MHz)  $\delta$  173.5, 171.2, 163.0, 160.5, 159.8, 158.9, 154.6, 137.8, 136.4, 136.3, 135.6, 130.5, 128.8, 128.7, 128.6, 128.4, 128.2, 127.8, 127.6, 127.3, 126.8, 123.3, 114.7, 109.9, 101.4, 98.4, 94.0, 74.7, 70.8, 70.7, 70.5, 70.2, 69.9, 67.8, 21.0, 17.1; HRMS (ESI) calcd for [C<sub>44</sub>H<sub>40</sub>O<sub>11</sub> + H]<sup>+</sup>: 745.2649, Found: 745.2642.

#### Kaempferol-3- $\alpha$ -L-4''-O-acetylramnoside (**1d**)

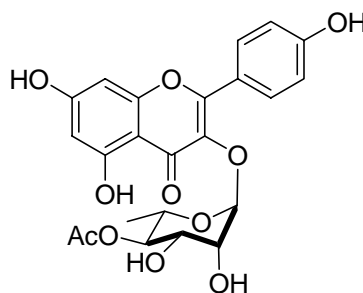

To a solution of 54.8 mg diol **11** (0.07 mmol) in 3 mL THF-EtOH (1:1) was added 30 mg Pearlman's catalyst (Pd-C, 10%). The reaction mixture was degassed using vacuum at -90 °C and refilling with H<sub>2</sub>. This procedure was repeated three times, then the bath was removed and the reaction was warmed up to room temperature. The reaction mixture was stirred under a H<sub>2</sub> atmosphere for 3 hours. The reaction mixture was loaded onto silica gel and elution with hexane-EtOAc (1:2) to give kaempferol-3- $\alpha$ -L-4''-O-acetylramnoside (**1d**) (30 mg, 87%):<sup>4c</sup> Yellow solid, mp: 150-152 °C; *R<sub>f</sub>* =

0.18 (1:3 (v/v) hexane/EtOAc);  $[\alpha]_D^{25}$  -145° (*c* 1.3, MeOH); IR (thin film,  $\text{cm}^{-1}$ ) 3317 (broad), 2927, 1721, 1651, 1607, 1500, 1446, 1359, 1253, 1207, 1172, 1141, 1085, 1047, 1004, 970, 952;  $^1\text{H}$  NMR (acetone- $\text{d}_6$ , 600 MHz)  $\delta$  7.84 (d,  $J$  = 9.0 Hz, 2H), 7.05 (d,  $J$  = 9.0 Hz, 2H), 6.47 (d,  $J$  = 1.8 Hz, 1H), 6.28 (d,  $J$  = 1.8 Hz, 1H), 5.53 (d,  $J$  = 1.2 Hz, 1H), 4.82 (dd,  $J$  = 9.6, 9.6 Hz, 1H), 4.23 (dd,  $J$  = 3.6, 1.8 Hz, 1H), 3.85 (dd,  $J$  = 9.6, 3.6 Hz, 1H), 3.40 (dq,  $J$  = 9.6, 6.0 Hz, 1H), 2.87 (brs, 1H), 1.97 (s, 3H), 0.78 (d,  $J$  = 6.6 Hz, 3H);  $^{13}\text{C}$  NMR (acetone- $\text{d}_6$ , 150 MHz)  $\delta$  179.3, 170.9, 165.1, 163.1, 161.1, 158.7, 158.2, 135.7, 131.8, 122.5, 116.4, 105.9, 102.4, 99.6, 94.7, 74.6, 71.5, 69.8, 69.1, 21.0, 17.6; HRMS (ESI) calcd for  $[\text{C}_{23}\text{H}_{22}\text{O}_{11} + \text{Na}]^+$ : 497.1060, Found: 497.1054.

**5,7-bis(benzyloxy)-2-(4-(benzyloxy)phenyl)-3-(2,4-*O*-triacetyl- $\alpha$ -L-rhamnopyranoyloxy)-4H-chromen-4-one (12)**

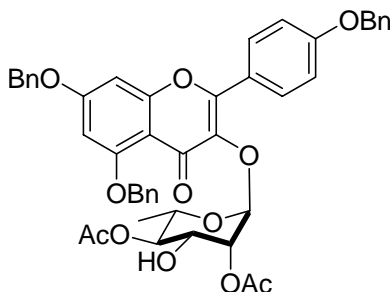

To a solution of 75 mg diol **11** (0.10 mmol) in 1.6 mL  $\text{CH}_2\text{Cl}_2$  was added 0.6 mg (3  $\mu\text{mol}$ ) *p*-TsOH $\cdot\text{H}_2\text{O}$ , 38  $\mu\text{L}$  trimethylorthoacetate (0.30 mmol) at 0 °C. After stirring at 0 °C for 15 min, 0.5 mL 90% HOAc (aq.) was added and the reaction mixture was stirred for another 15 min. The reaction mixture was diluted with 25 mL EtOAc and washed at 0 °C by 3 mL saturated  $\text{NaHCO}_3$  two times, then it was washed by 3 mL saturated brine, and dried over  $\text{Na}_2\text{SO}_4$ . The organic layer was concentrated under reduced pressure to give crude product, which was then subjected to chromatograph on silica gel. Elution with hexane-EtOAc (1:1) gave diacetate **12** (78 mg, 99%):

White solid, mp: 99.5-101.5 °C;  $R_f$  = 0.58 (1:2 (v/v) hexane/EtOAc);  $[\alpha]_D^{25}$  -115° ( $c$  1.1, CHCl<sub>3</sub>); IR (thin film, cm<sup>-1</sup>) 3430 (broad), 3032, 2927, 1741, 1628, 1604, 1575, 1509, 1499, 1486, 1453, 1433, 1373, 1299, 1225, 1196, 1174, 1136, 1099, 1047, 1017, 963; <sup>1</sup>H NMR (CDCl<sub>3</sub>, 600 MHz)  $\delta$  7.81 (d,  $J$  = 9.0 Hz, 2H), 7.56 (d,  $J$  = 7.2 Hz, 2H), 7.46-7.27 (m, 13H), 7.11 (d,  $J$  = 9.0 Hz, 2H), 6.55 (d,  $J$  = 2.4 Hz, 1H), 6.45 (d,  $J$  = 2.4 Hz, 1H), 5.58 (d,  $J$  = 1.2 Hz, 1H), 5.57 (dd,  $J$  = 3.6, 1.8 Hz, 1H), 5.26 (s, 2H), 5.16 (s, 2H), 5.07 (s, 2H), 4.76 (dd,  $J$  = 10.2, 9.6 Hz, 1H), 4.11 (ddd,  $J$  = 9.6, 6.6, 3.0 Hz, 1H), 3.50 (dq,  $J$  = 10.2, 6.6 Hz, 1H), 2.28 (d,  $J$  = 6.6 Hz, 1H), 2.12 (s, 3H), 2.06 (s, 3H), 0.89 (d,  $J$  = 6.0 Hz, 3H); <sup>13</sup>C NMR (CDCl<sub>3</sub>, 150 MHz)  $\delta$  173.0, 171.2, 170.5, 162.9, 160.6, 159.9, 158.8, 154.3, 136.9, 136.3, 135.6, 130.3, 128.8, 128.7, 128.6, 128.4, 128.2, 127.7, 127.6, 127.3, 126.7, 123.1, 114.9, 110.0, 98.4, 98.3, 94.0, 74.1, 72.1, 70.8, 70.5, 70.2, 68.8, 67.9, 21.0, 20.9, 17.1; HRMS (ESI) calcd for [C<sub>46</sub>H<sub>42</sub>O<sub>12</sub> + Na]<sup>+</sup>: 809.2574, Found: 809.2567.

**Kaempferol-3- $\alpha$ -L-2'',4''-O-diacetylramnoside (1e)**

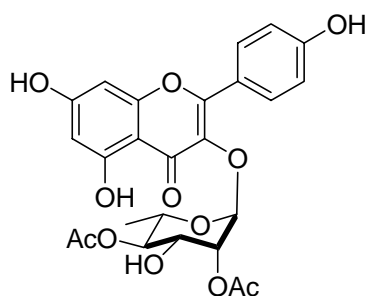

To a solution of 66.8 mg diacetate **12** (0.08 mmol) in 3 mL THF-EtOH (1:1) was added 30 mg Pearlman's catalyst (Pd-C, 10%). The reaction mixture was degassed using vacuum at -90 °C and refilling with H<sub>2</sub>. This procedure was repeated three times, then the bath was removed and the reaction was warmed up to room temperature. The reaction mixture was stirred under a H<sub>2</sub> atmosphere for 3 hours. The reaction mixture was loaded onto silica gel and elution with hexane-EtOAc (2:3) to give kaempferol-3-

$\alpha$ -L-2'',4''-O-diacetylrrhamnoside (**1e**) (38 mg, 88%):<sup>6</sup> Yellow solid, mp: 127-129 °C;  $R_f$  = 0.24 (1:2 (v/v) hexane/EtOAc);  $[\alpha]_D^{25}$  -93° (c 0.96, MeOH); IR (thin film, cm<sup>-1</sup>) 3311 (broad), 2925, 1721, 1653, 1608, 1502, 1445, 1362, 1205, 1171, 1144, 1129, 1085, 1047, 1007, 970; <sup>1</sup>H NMR (acetone-d<sub>6</sub>, 600 MHz)  $\delta$  7.85 (d,  $J$  = 9.0 Hz, 2H), 7.06 (d,  $J$  = 8.4 Hz, 2H), 6.48 (d,  $J$  = 1.8 Hz, 1H), 6.28 (d,  $J$  = 1.8 Hz, 1H), 5.60 (s, 1H), 5.47 (dd,  $J$  = 3.6, 1.8 Hz, 1H), 4.76 (dd,  $J$  = 10.2, 9.6 Hz, 1H), 4.04 (dd,  $J$  = 9.6, 3.6 Hz, 1H), 3.38 (dq,  $J$  = 10.2, 6.0 Hz, 1H), 2.06 (s, 3H), 1.99 (s, 3H), 0.81 (d,  $J$  = 6.0 Hz, 3H); <sup>13</sup>C NMR (acetone-d<sub>6</sub>, 150 MHz)  $\delta$  179.0, 170.8, 170.3, 165.2, 163.0, 161.2, 158.8, 158.1, 134.8, 131.8, 122.3, 116.5, 105.8, 99.7, 99.3, 94.7, 74.4, 72.4, 69.2, 68.0, 21.0, 20.9, 17.7; HRMS (ESI) calcd for [C<sub>25</sub>H<sub>24</sub>O<sub>12</sub> + Na]<sup>+</sup>: 539.1166, Found: 539.1159.

**5,7-bis(benzyloxy)-2-(4-(benzyloxy)phenyl)-3-(3,4-O-triacetyl- $\alpha$ -L-rhamnopyranoyloxy)-4H-chromen-4-one (**13**)**

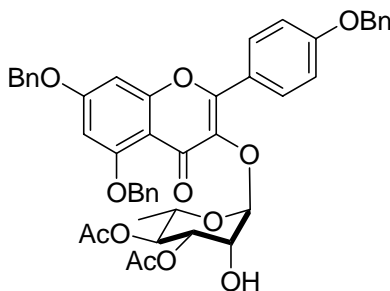

To a solution of 50 mg diacetate **12** (0.064 mmol) in 4 mL toluene was added a solution of 10  $\mu$ l DBU in 1 mL toluene at 0 °C. The reaction mixture was stirred at 0 °C for 1 hour, then diluted with 20 mL Et<sub>2</sub>O-EtOAc (1:1). The mixture was sequentially washed with 2 mL saturated NH<sub>4</sub>Cl, 2 mL saturated NaHCO<sub>3</sub>, dried over Na<sub>2</sub>SO<sub>4</sub>. The organic layer was concentrated under reduced pressure to give a residue. Crude <sup>1</sup>H-NMR showed this residue contains 64% diacetate **13** vs. 36% diacetate **12**.

<sup>6</sup> Nakatani, N.; Jitoe, A.; Masuda, T. *Agric. Biol. Chem.* **1991**, 55(2), 455-460.

Chromatograph on silica gel eluting with hexane-EtOAc (1.6:1) gave desired diacetate **13** (31 mg, 62%) and further elution with hexane-EtOAc (1.4:1) gave 17 mg (34%) starting material **12** back. Diacetate **13** : White solid, mp: 93-95 °C;  $R_f$  = 0.59 (2:3 (v/v) hexane/EtOAc);  $[\alpha]_D^{25}$  -151° ( $c$  1.3, CHCl<sub>3</sub>); IR (thin film, cm<sup>-1</sup>) 3394 (broad), 3064, 2924, 1741, 1604, 1509, 1453, 1432, 1369, 1353, 1296, 1249, 1222, 1172, 1100, 1043, 1004, 958; <sup>1</sup>H NMR (CDCl<sub>3</sub>, 600 MHz)  $\delta$  7.86 (d,  $J$  = 8.4 Hz, 2H), 7.55 (d,  $J$  = 7.8 Hz, 2H), 7.46-7.27 (m, 13H), 7.12 (d,  $J$  = 9.0 Hz, 2H), 6.56 (d,  $J$  = 2.4 Hz, 1H), 6.46 (d,  $J$  = 2.4 Hz, 1H), 5.53 (d,  $J$  = 2.4 Hz, 1H), 5.31 (dd,  $J$  = 9.0, 3.0 Hz, 1H), 5.26 (s, 2H), 5.15 (s, 2H), 5.08 (s, 2H), 4.98 (dd,  $J$  = 9.6, 9.0 Hz, 1H), 4.57 (ddd,  $J$  = 6.6, 3.6 Hz, 1H), 3.46 (dq,  $J$  = 9.6, 6.6 Hz, 1H), 2.87 (brs, 1H), 2.07 (s, 3H), 1.99 (s, 3H), 0.82 (d,  $J$  = 6.0 Hz, 3H); <sup>13</sup>C NMR (CDCl<sub>3</sub>, 150 MHz)  $\delta$  173.3, 169.9, 169.8, 163.0, 160.5, 159.9, 158.9, 154.5, 137.6, 136.4, 136.3, 135.6, 130.5, 128.8, 128.7, 128.6, 128.4, 128.2, 127.7, 127.6, 127.3, 126.7, 123.2, 114.8, 109.9, 101.9, 98.3, 94.0, 74.7, 71.2, 70.8, 70.5, 70.1, 69.5, 67.9, 20.9, 20.8, 17.2; HRMS (ESI) calcd for [C<sub>46</sub>H<sub>42</sub>O<sub>12</sub> + Na]<sup>+</sup>: 809.2574, Found: 809.2569.

#### SL0101 (1a)

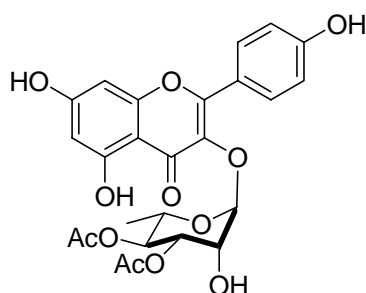

To a solution of 46 mg diacetate **13** (0.058 mmol) in 2.5 mL THF-EtOH (1:1) was added 25 mg Pearlman's catalyst (Pd-C, 10%). The reaction mixture was degassed using vacuum at -90 °C and refilling with H<sub>2</sub>. This procedure was repeated three times, then the bath was removed and the reaction was warmed up to room temperature. The

reaction mixture was stirred under a H<sub>2</sub> atmosphere for 3 hours. The reaction mixture was loaded onto silica gel and elution with hexane-EtOAc (2:3) to give SL0101 (**1a**) (28 mg, 91%):<sup>1,4a,6</sup> Yellow solid, mp: 147-149 °C; *R<sub>f</sub>* = 0.26 (1:2 (v/v) hexane/EtOAc); [ $\alpha$ ]<sub>D</sub><sup>25</sup> -163° (*c* 1.6, MeOH); IR (thin film, cm<sup>-1</sup>) 3211 (broad), 2980, 2930, 1722, 1650, 1607, 1502, 1444, 1361, 1206, 1171, 1045, 1005, 970; <sup>1</sup>H NMR (acetone-d<sub>6</sub>, 600 MHz)  $\delta$  7.86 (d, *J* = 9.0 Hz, 2H), 7.05 (d, *J* = 9.0 Hz, 2H), 6.48 (d, *J* = 1.8 Hz, 1H), 6.28 (d, *J* = 1.8 Hz, 1H), 5.56 (d, *J* = 1.8 Hz, 1H), 5.17 (dd, *J* = 10.2, 3.0 Hz, 1H), 5.07 (dd, *J* = 10.2, 9.6 Hz, 1H), 4.42 (dd, *J* = 3.0, 1.8 Hz, 1H), 3.49 (dq, *J* = 9.6, 6.0 Hz, 1H), 2.02 (s, 3H), 1.96 (s, 3H), 0.82 (d, *J* = 6.0 Hz, 3H); <sup>13</sup>C NMR (acetone-d<sub>6</sub>, 150 MHz)  $\delta$  179.2, 170.7, 170.4, 165.1, 163.0, 161.1, 158.7, 158.2, 135.5, 131.8, 122.4, 116.5, 105.8, 102.2, 99.7, 99.6, 94.7, 72.3, 71.2, 69.3, 69.2, 21.0, 20.8, 17.6; HRMS (ESI) calcd for [C<sub>25</sub>H<sub>24</sub>O<sub>12</sub> + Na]<sup>+</sup>: 539.1166, Found: 539.1161.

## Section C: <sup>1</sup>H and <sup>13</sup>C NMR Spectra

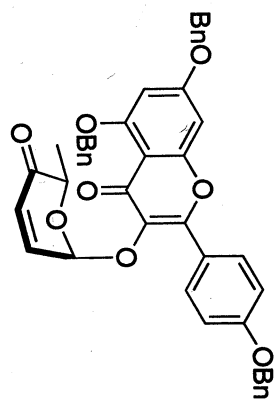

$^1\text{H NMR}$  ( $\text{CDCl}_3$ , 600 MHz)

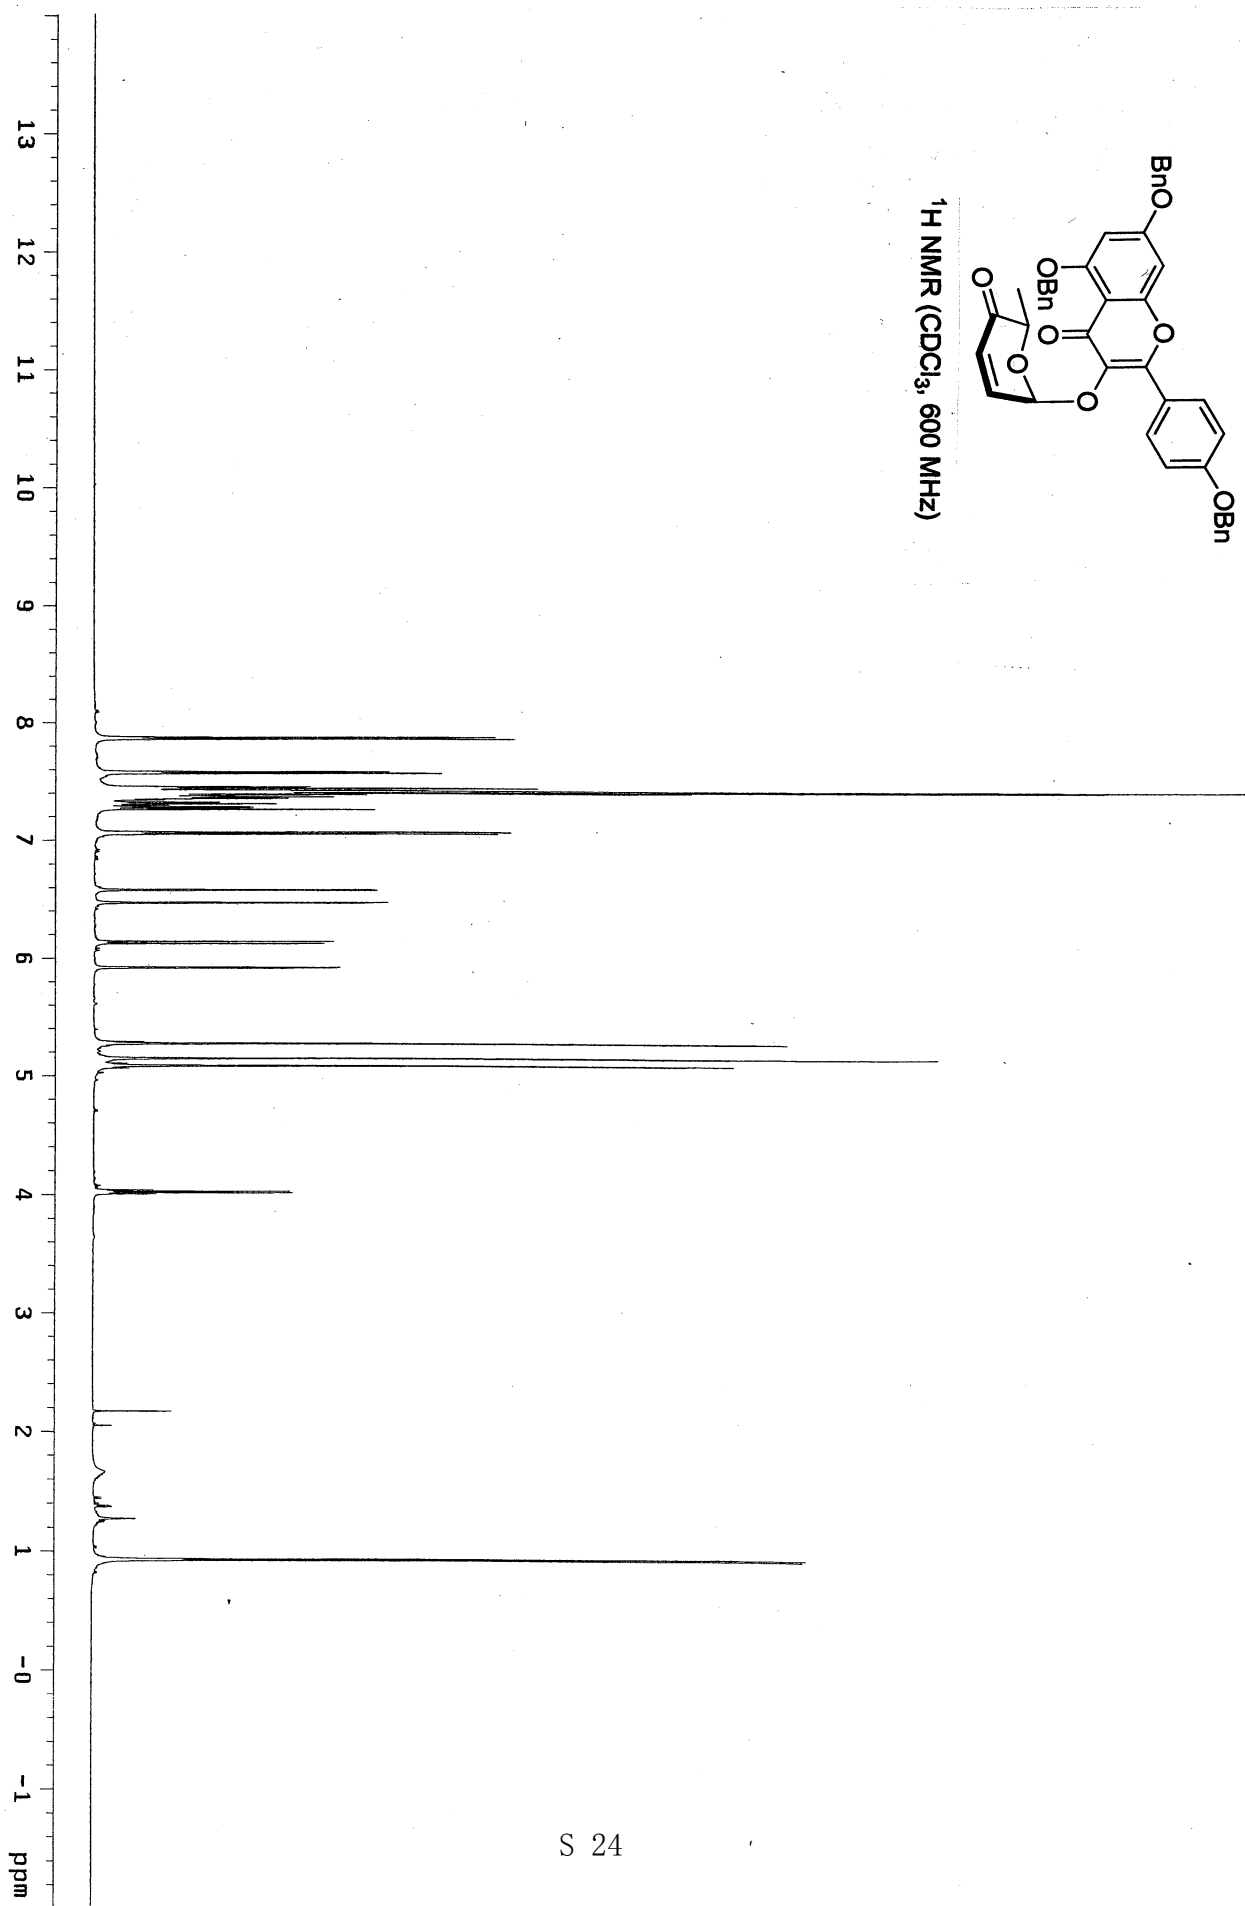

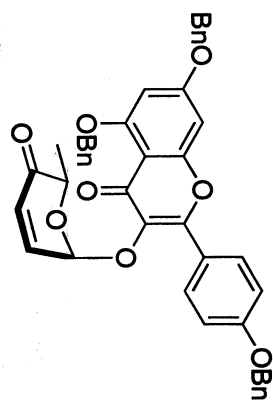

$^{13}\text{C}$  NMR ( $\text{CDCl}_3$ , 150 MHz)

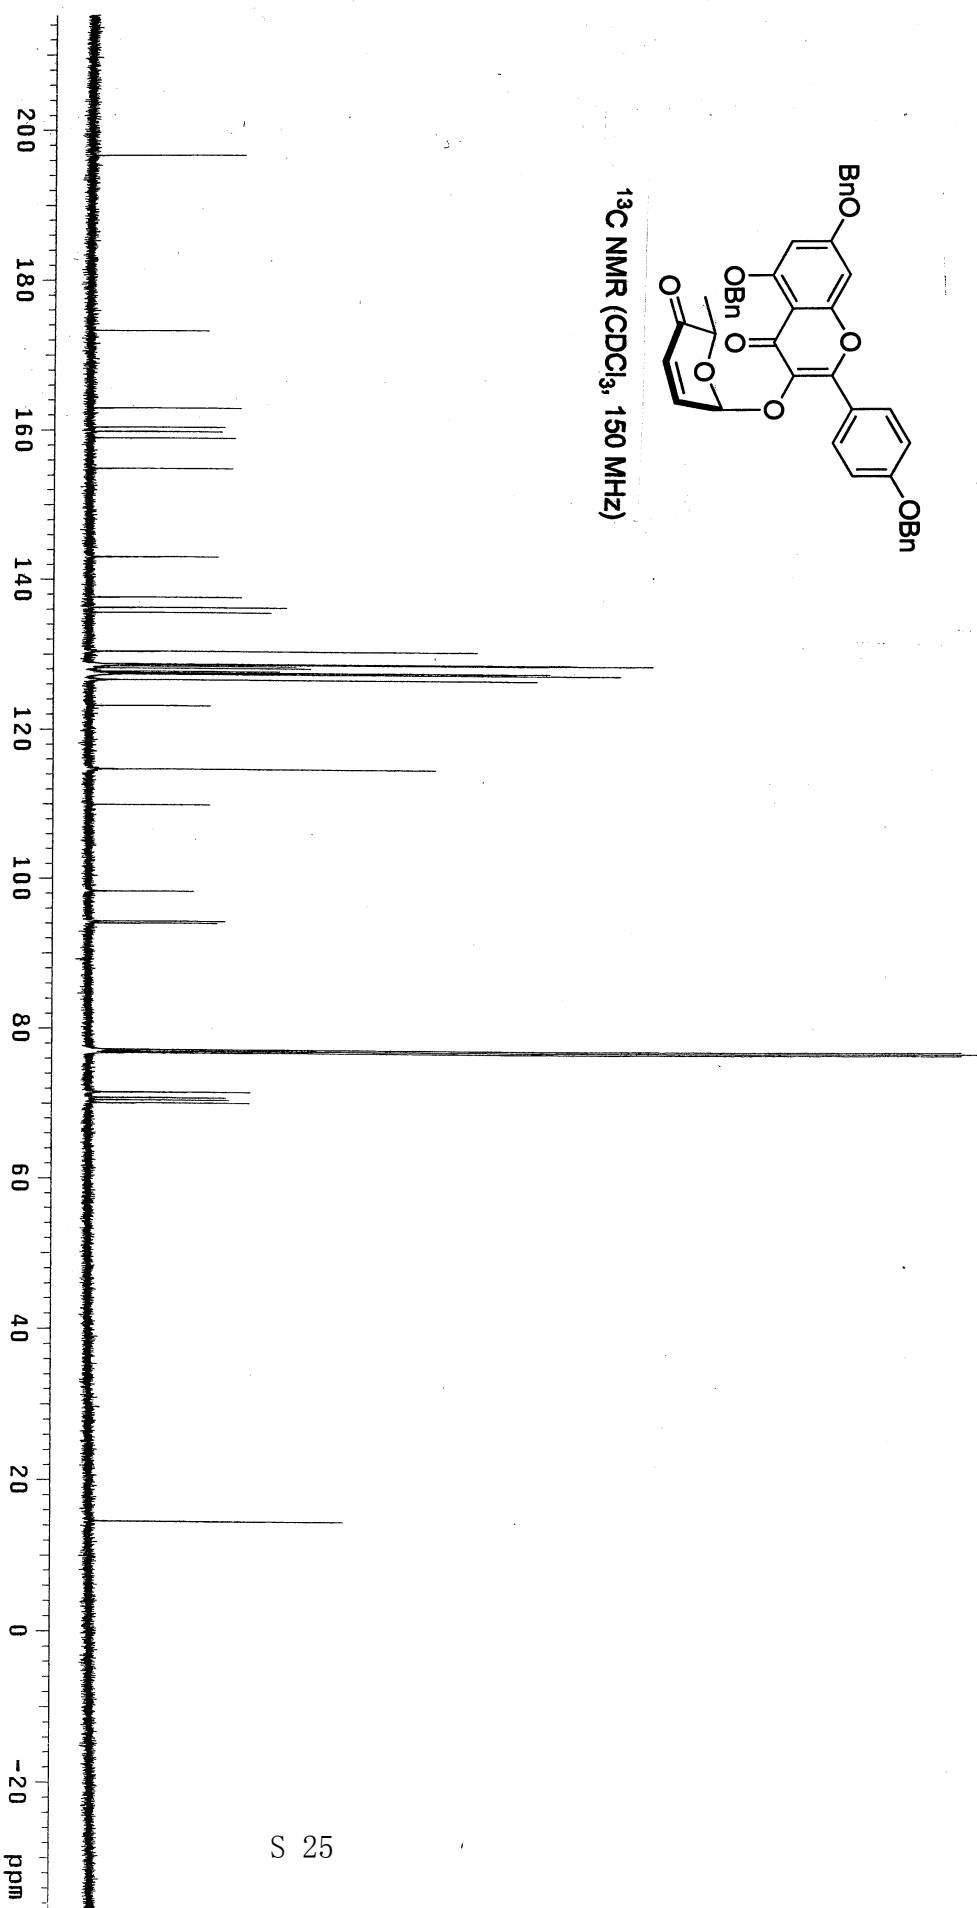

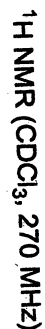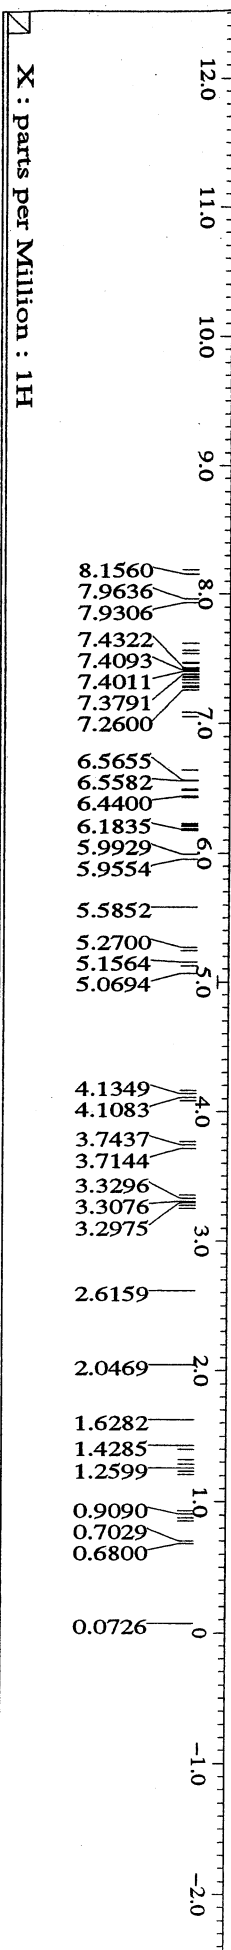

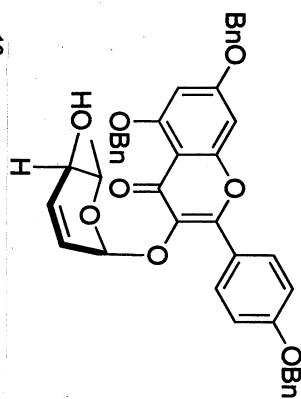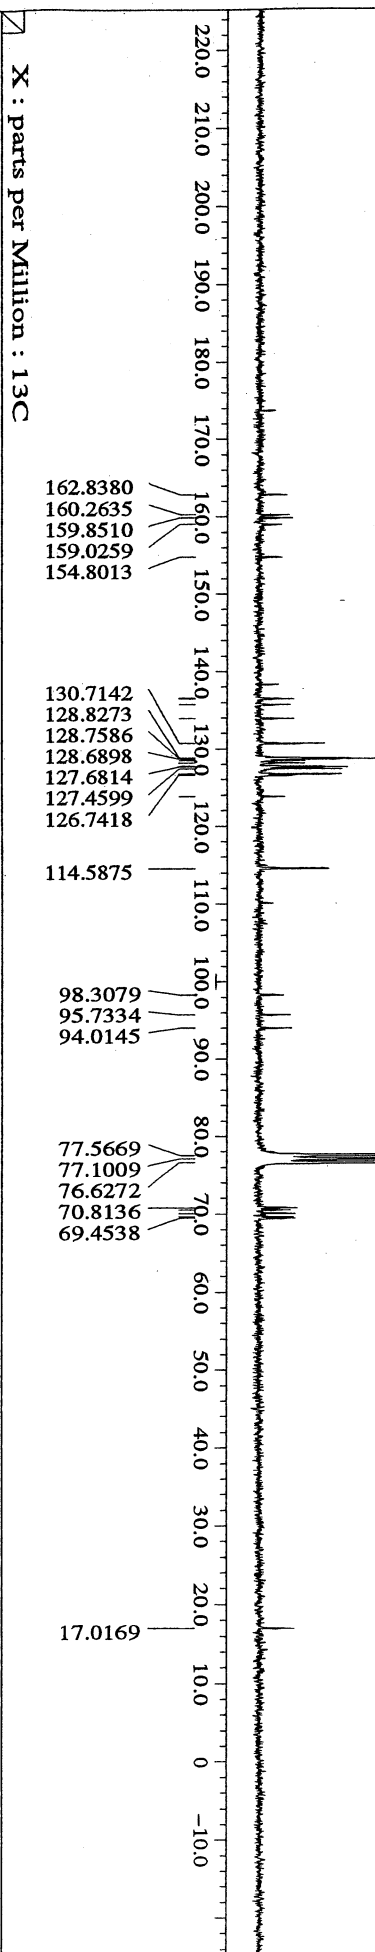

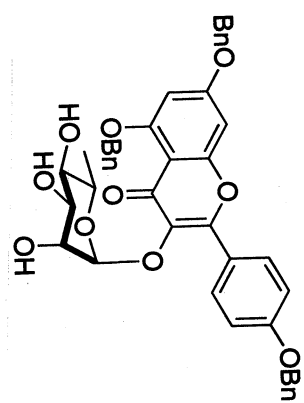

$^1\text{H}$  NMR (acetone- $d_6$ , 600 MHz)

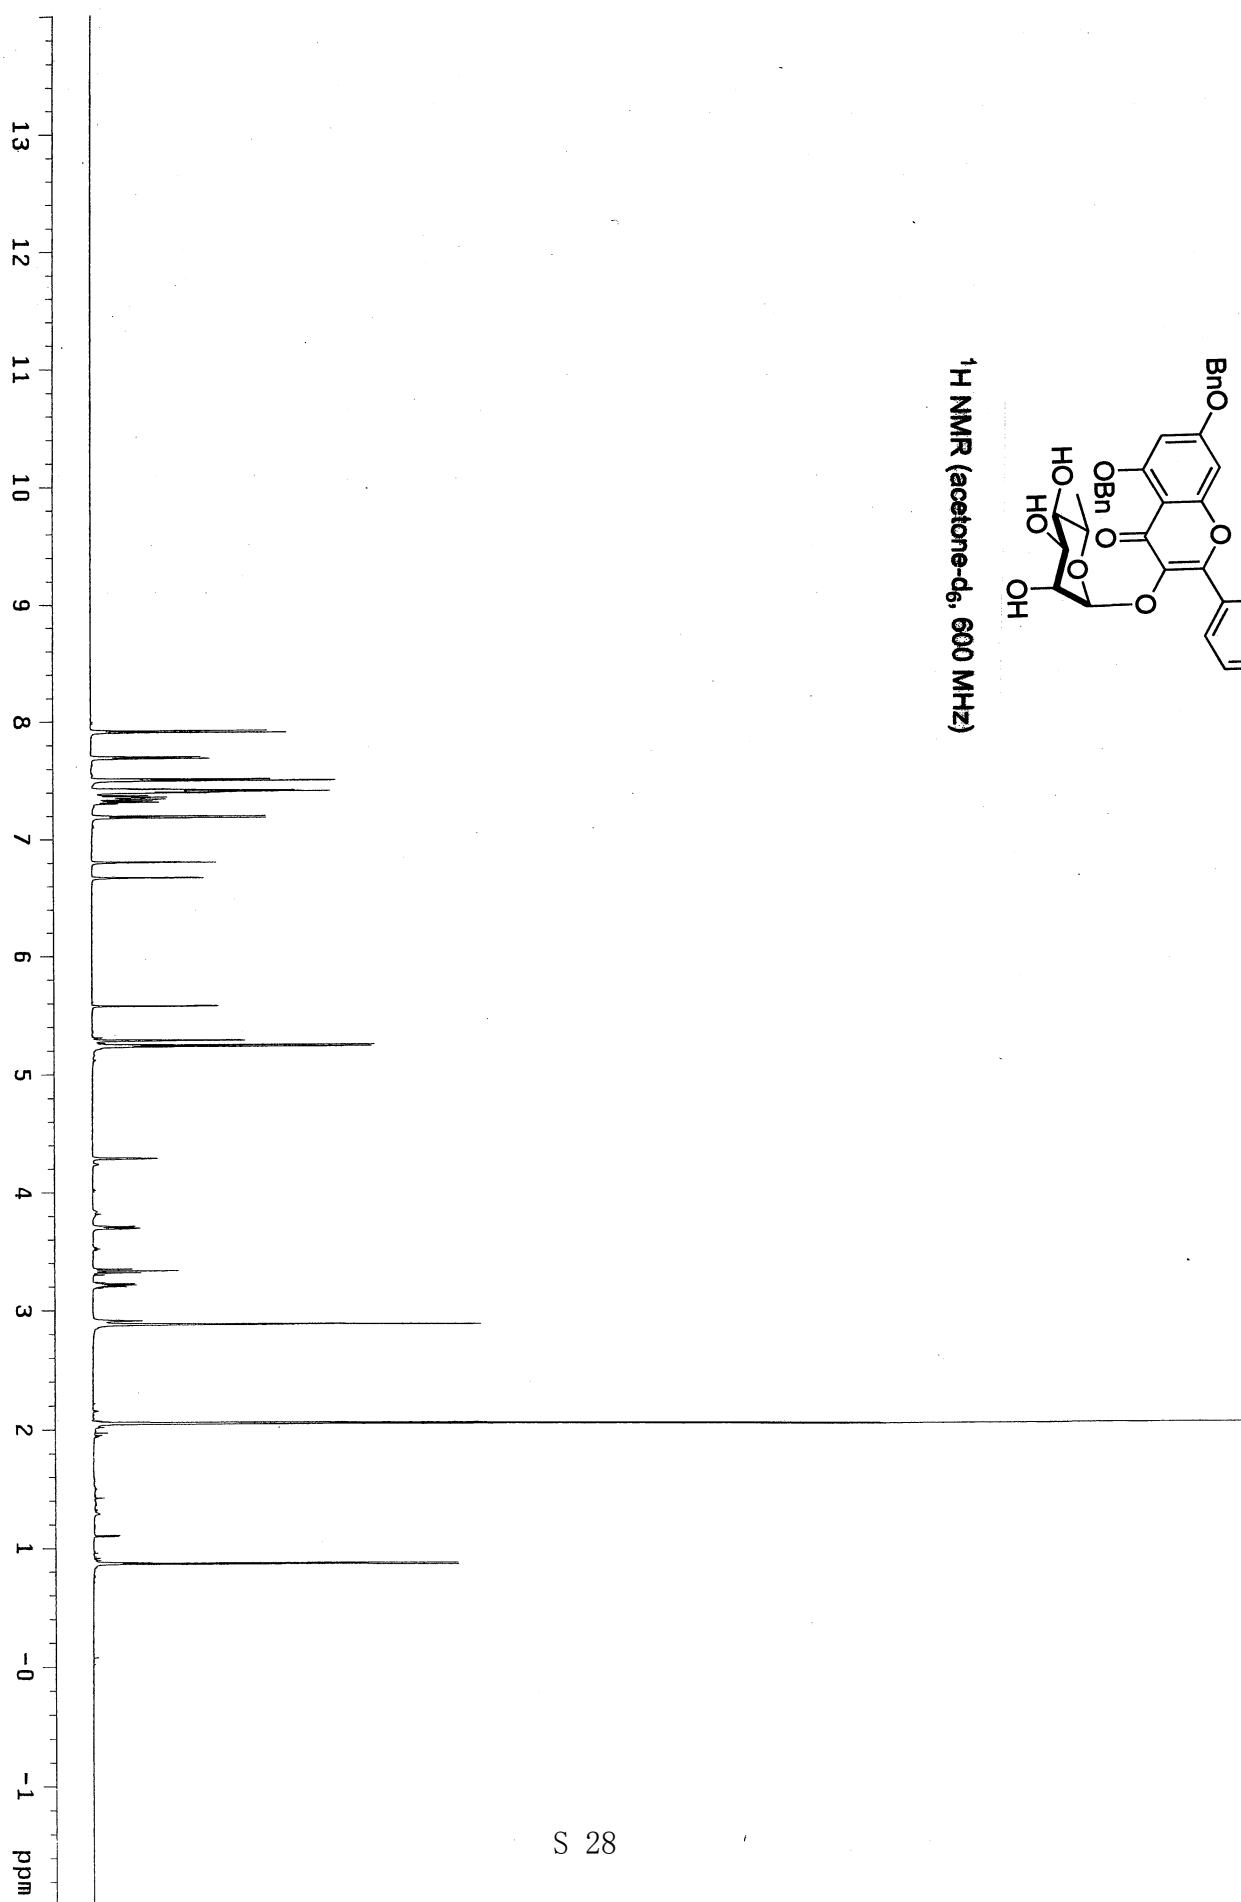

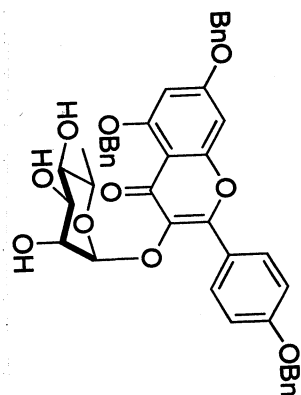

$^{13}\text{C}$  NMR (acetone- $d_6$ , 150 MHz)

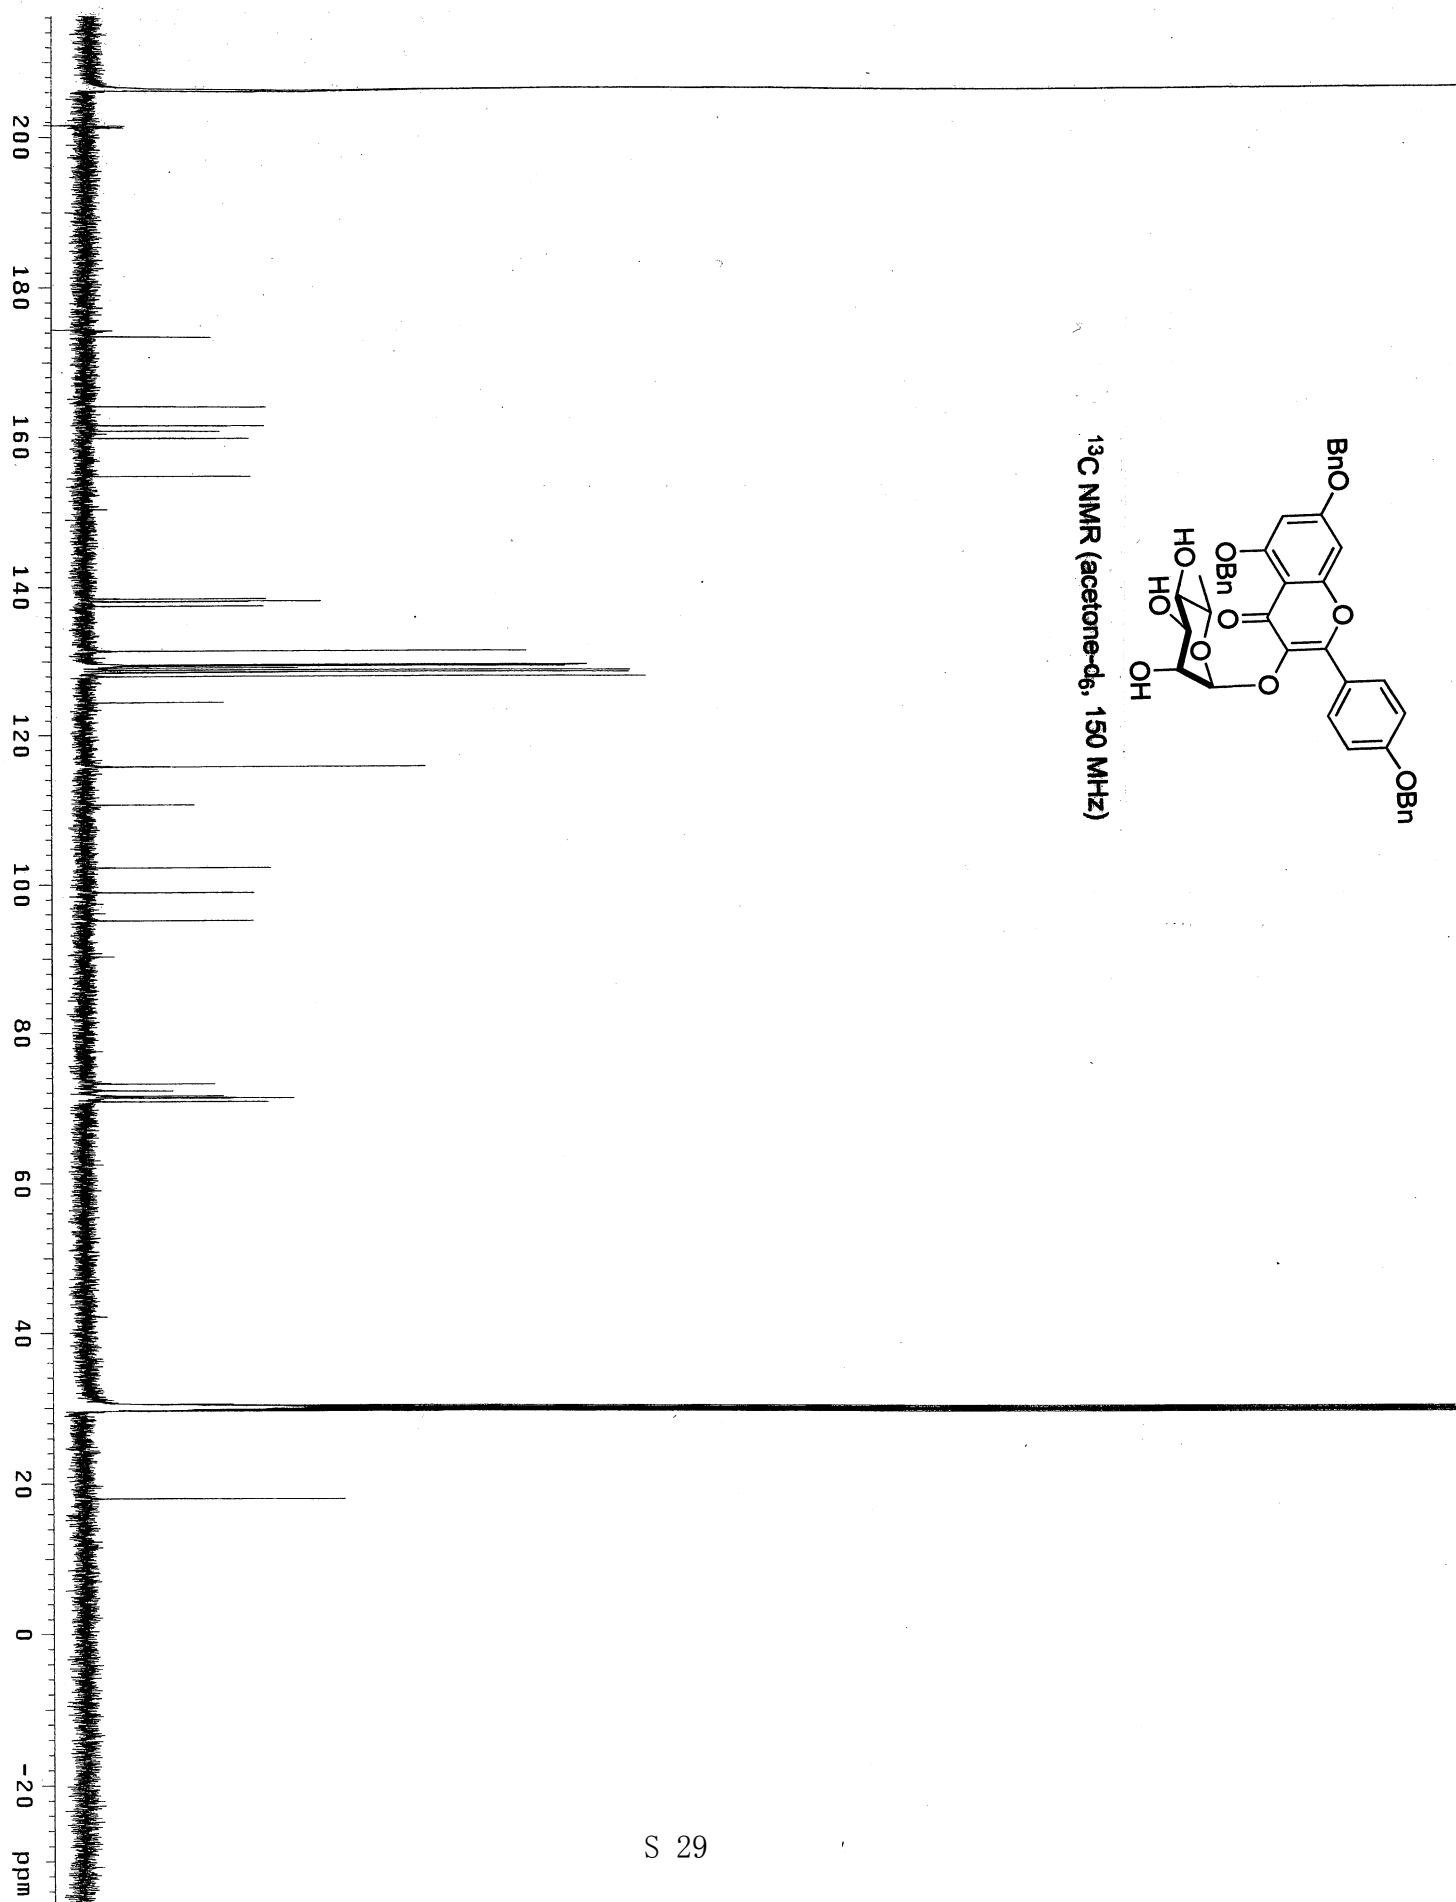

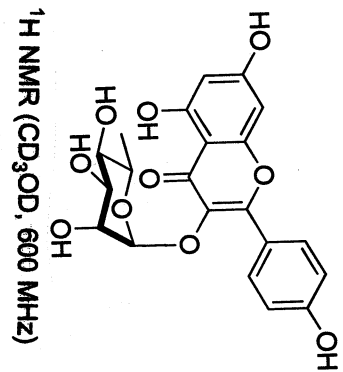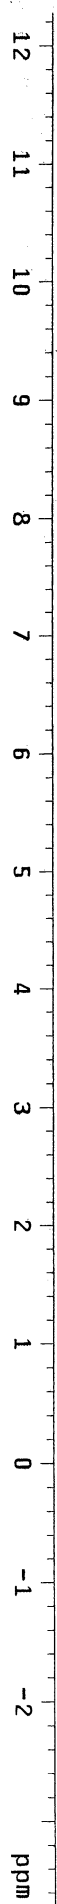

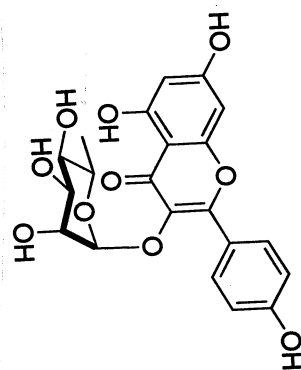

$^{13}\text{C}$  NMR ( $\text{CD}_3\text{OD}$ , 150 MHz)

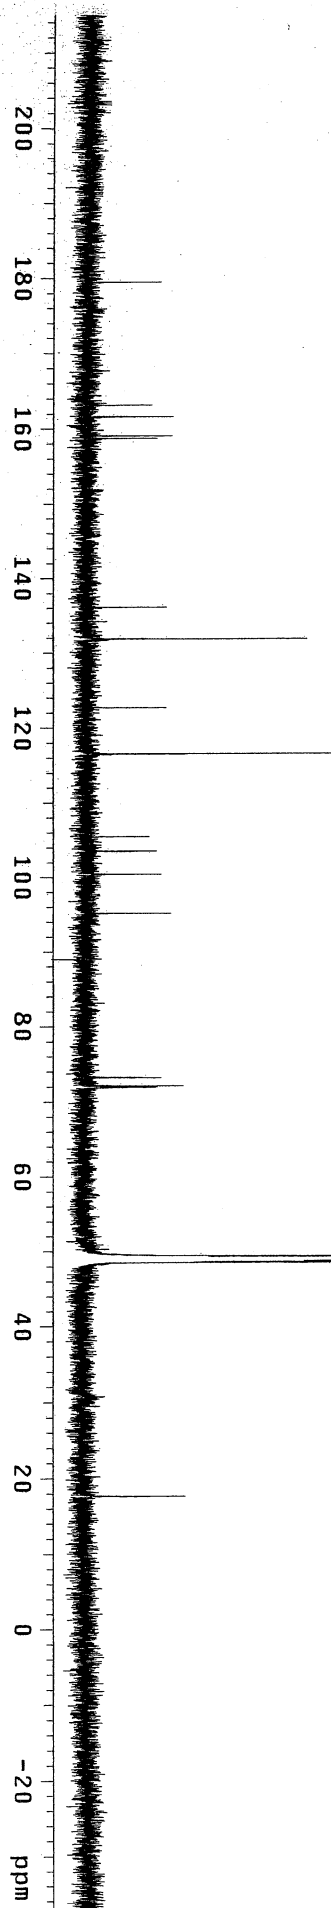

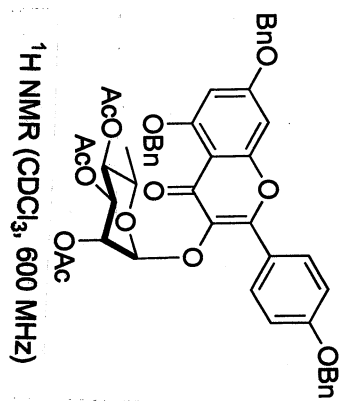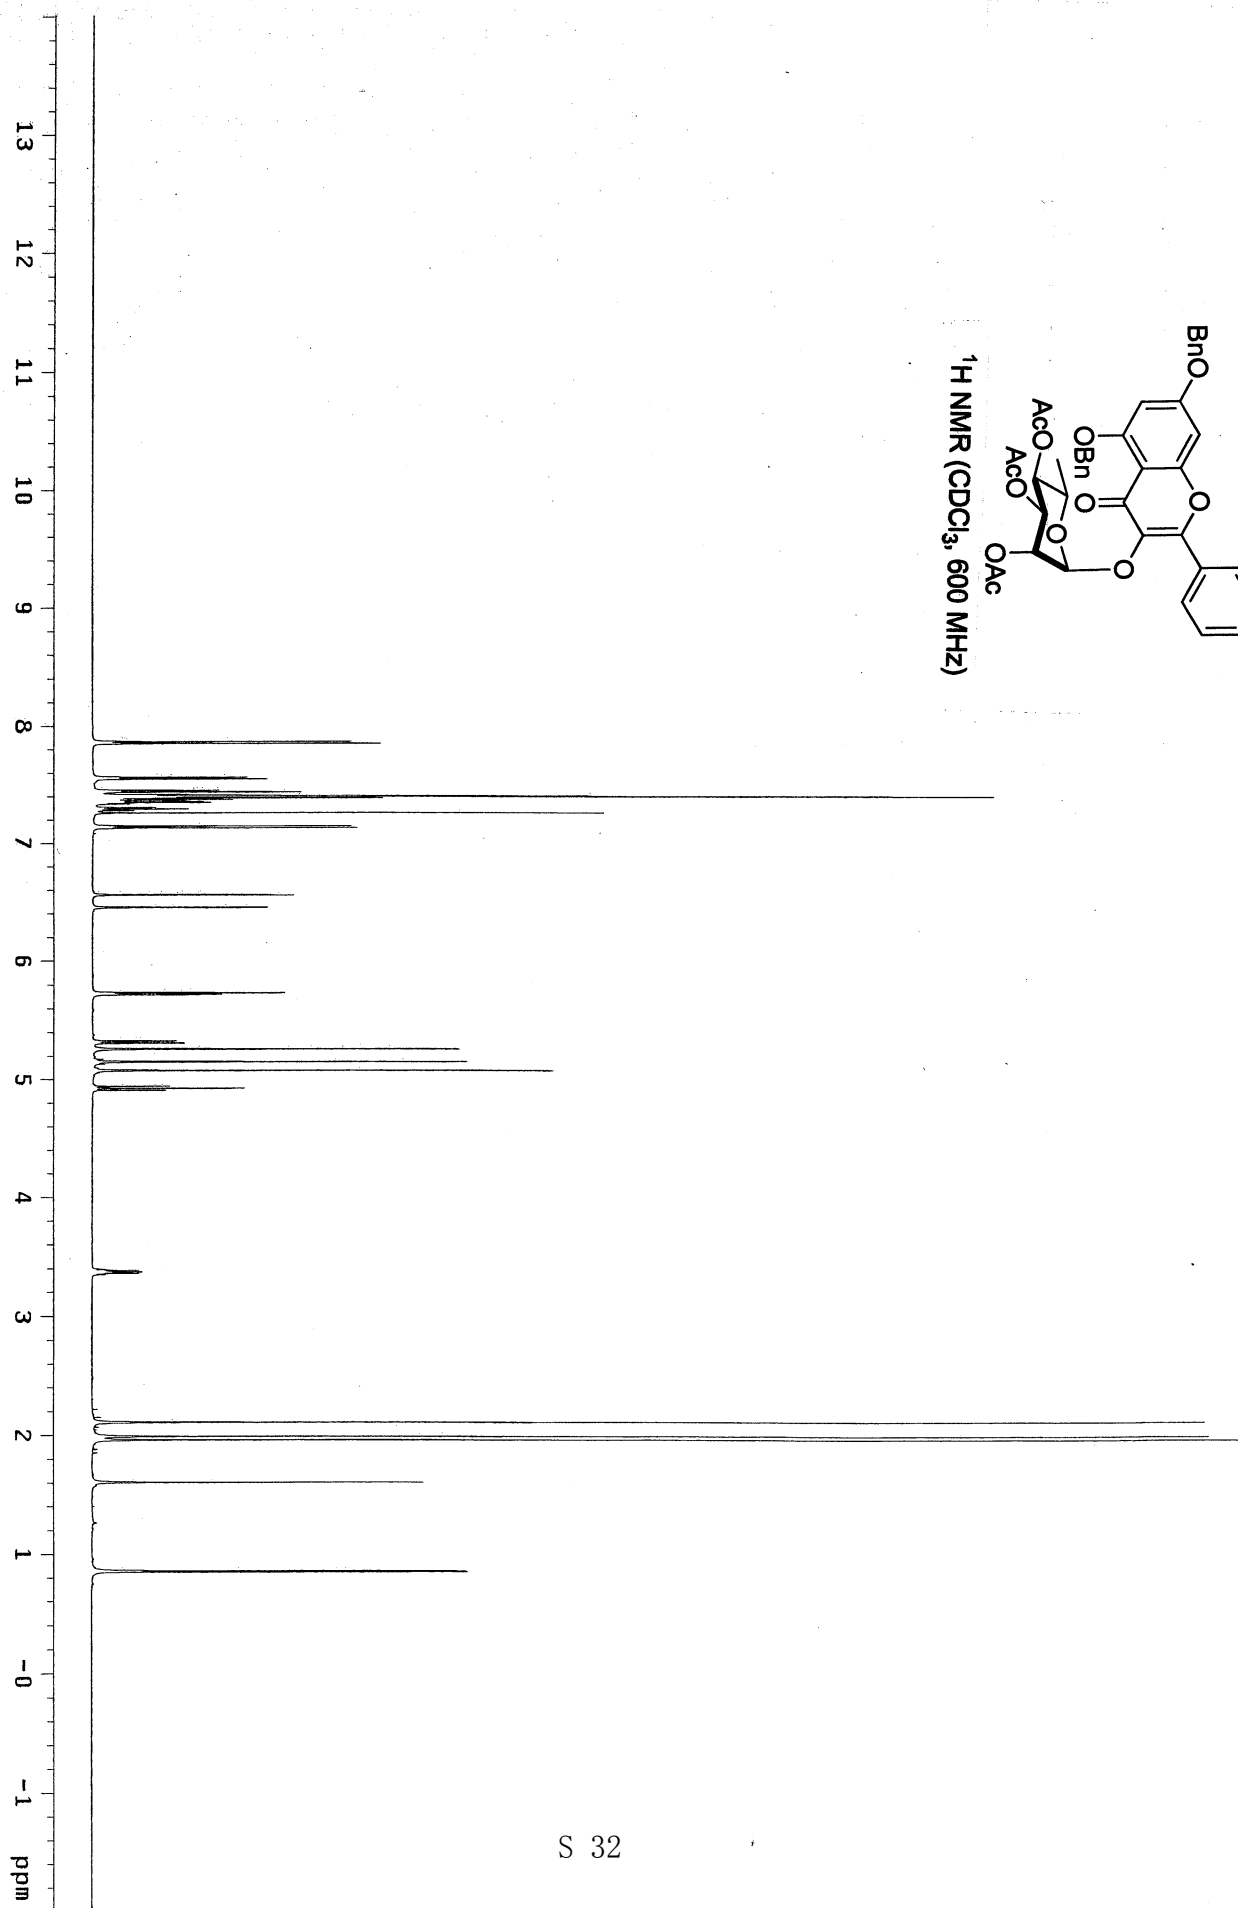

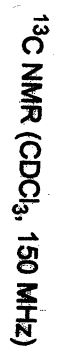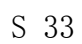

<sup>1</sup>H NMR (CDCl<sub>3</sub>, 600 MHz)

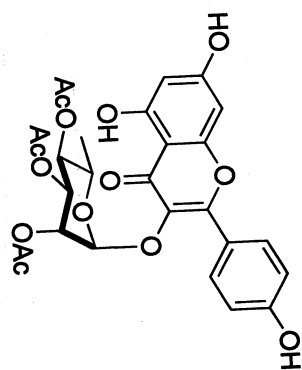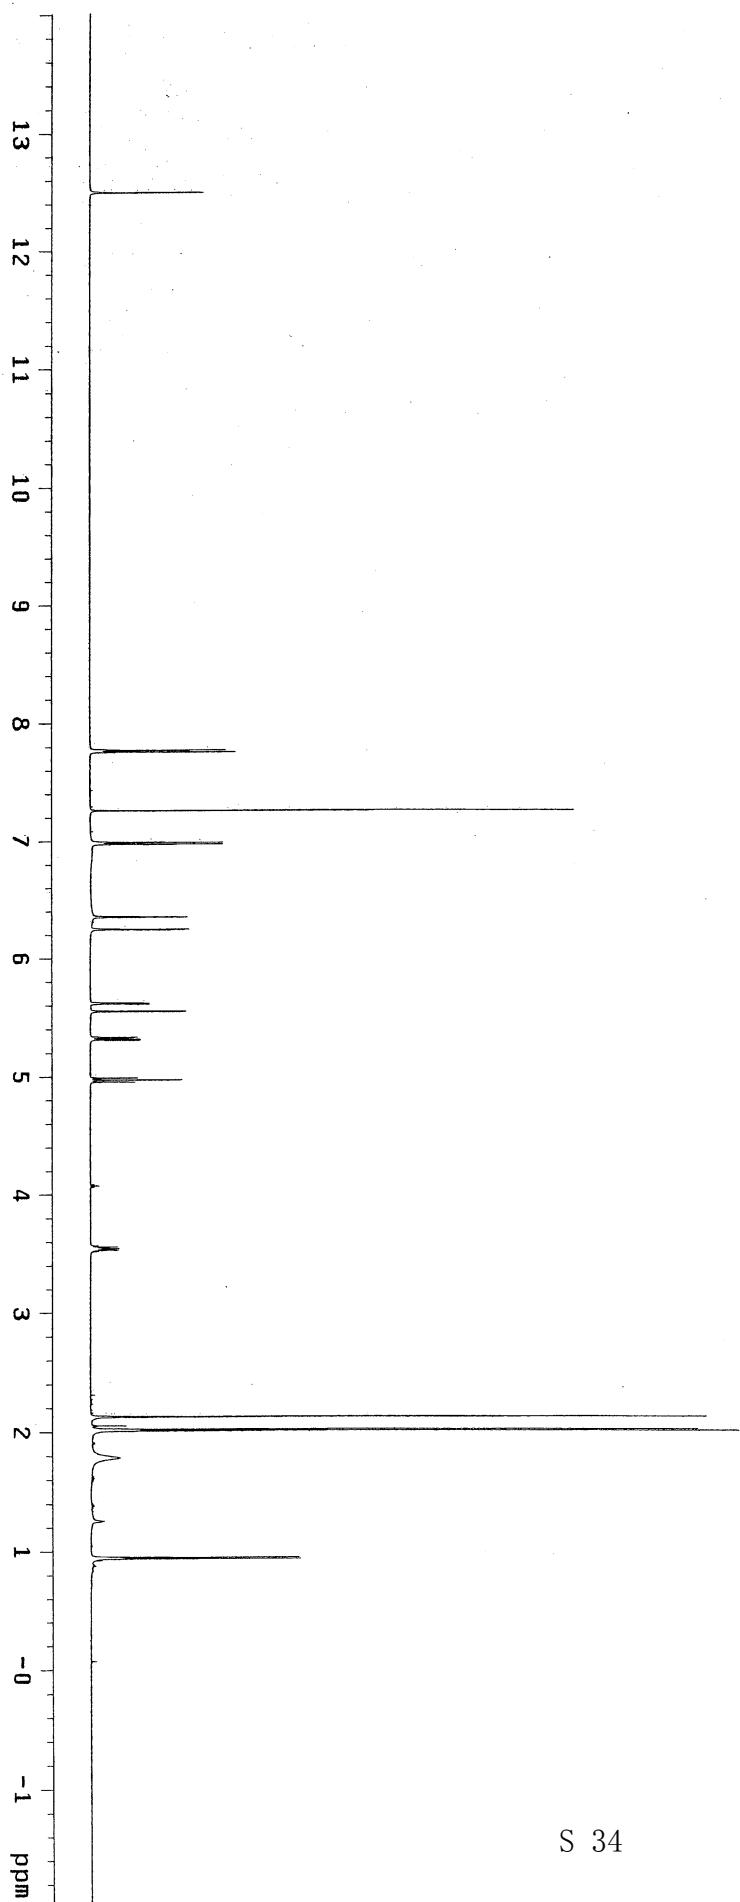

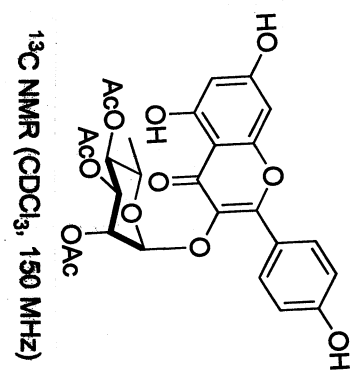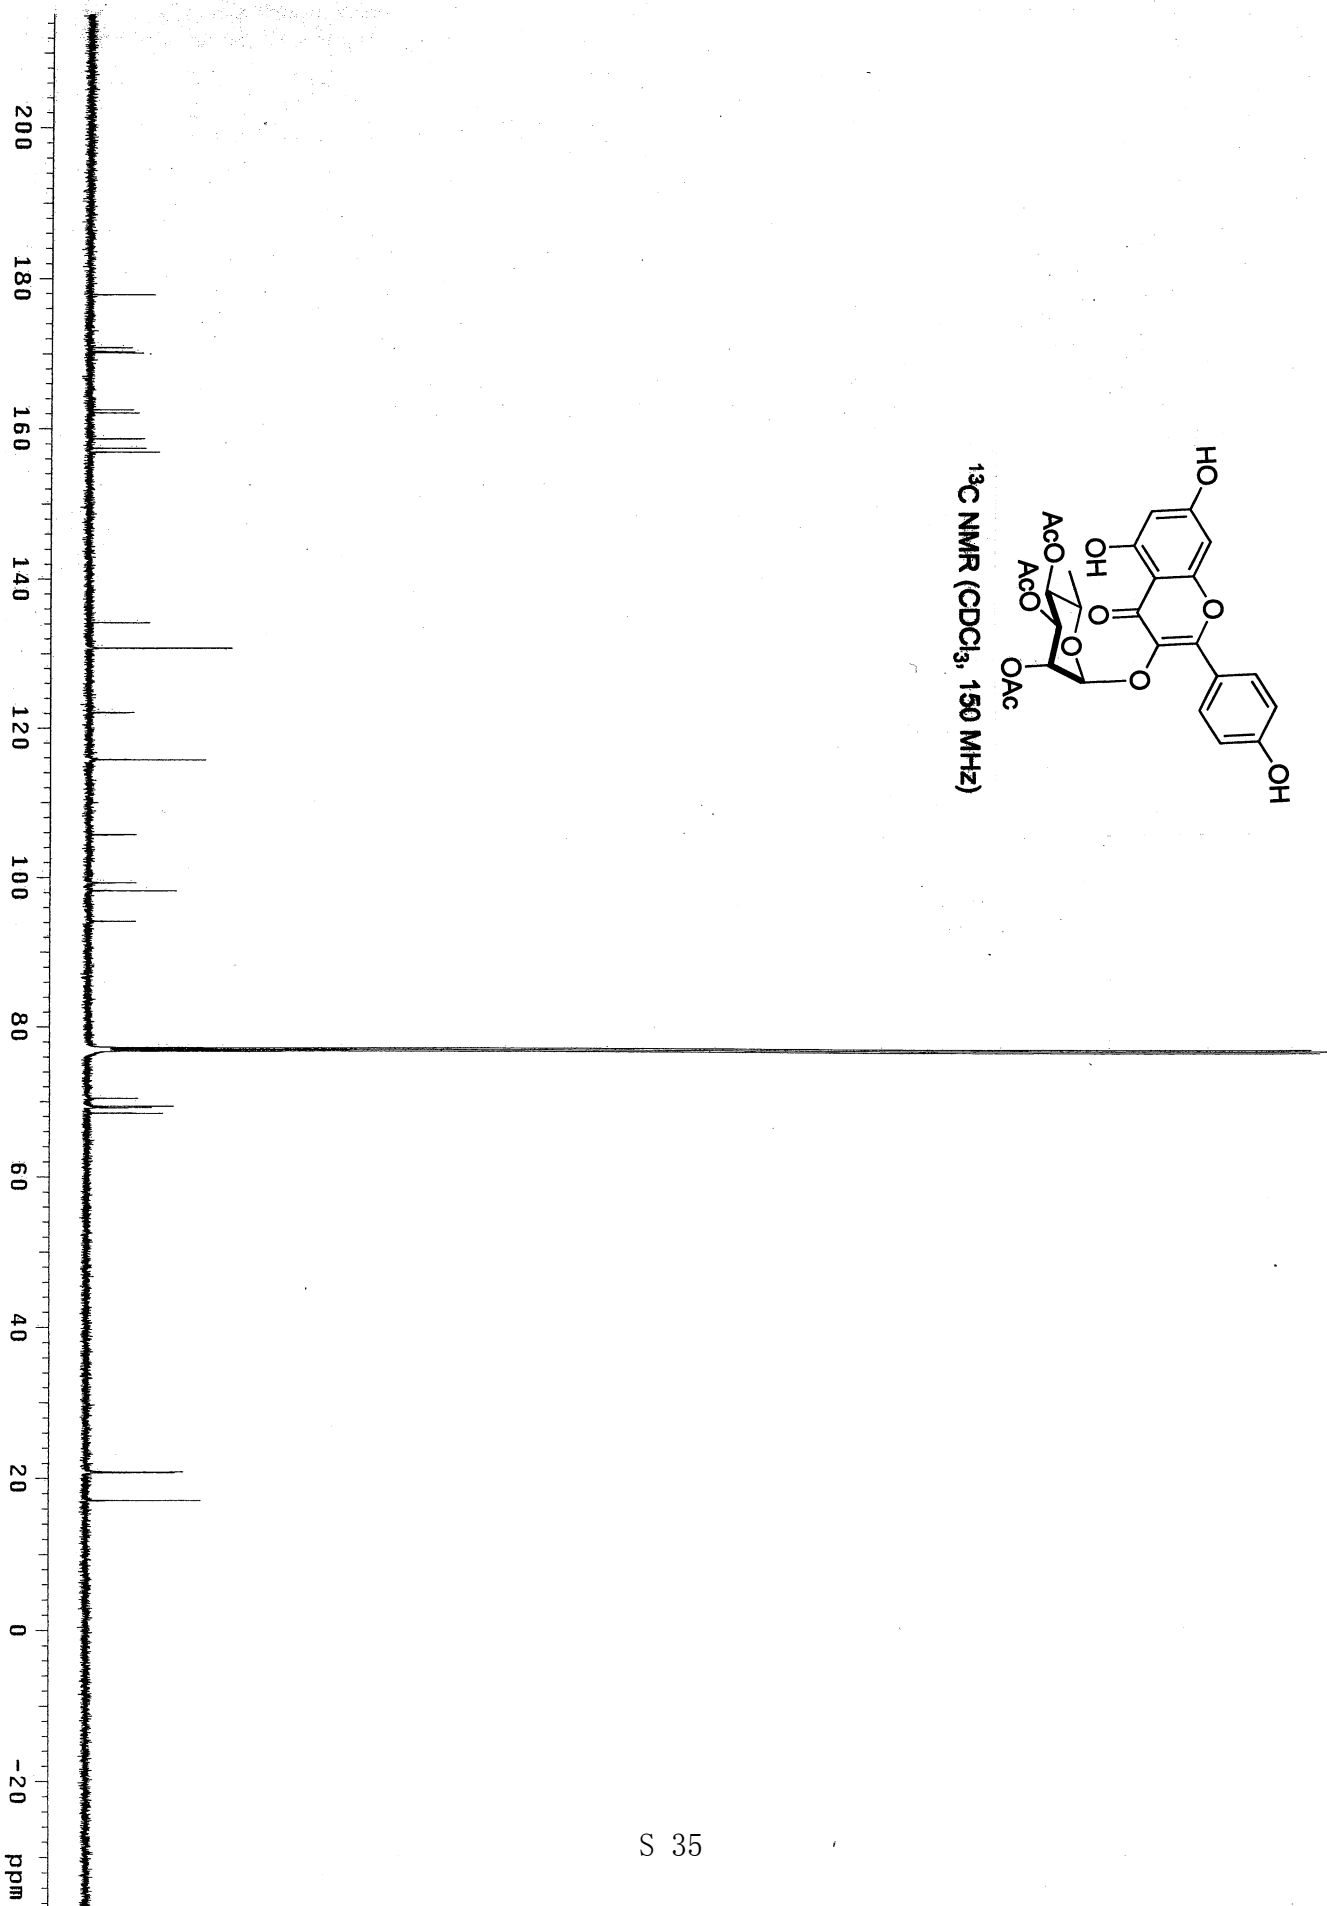

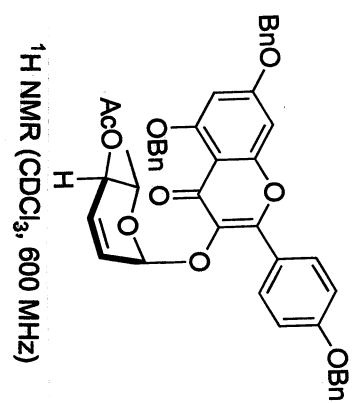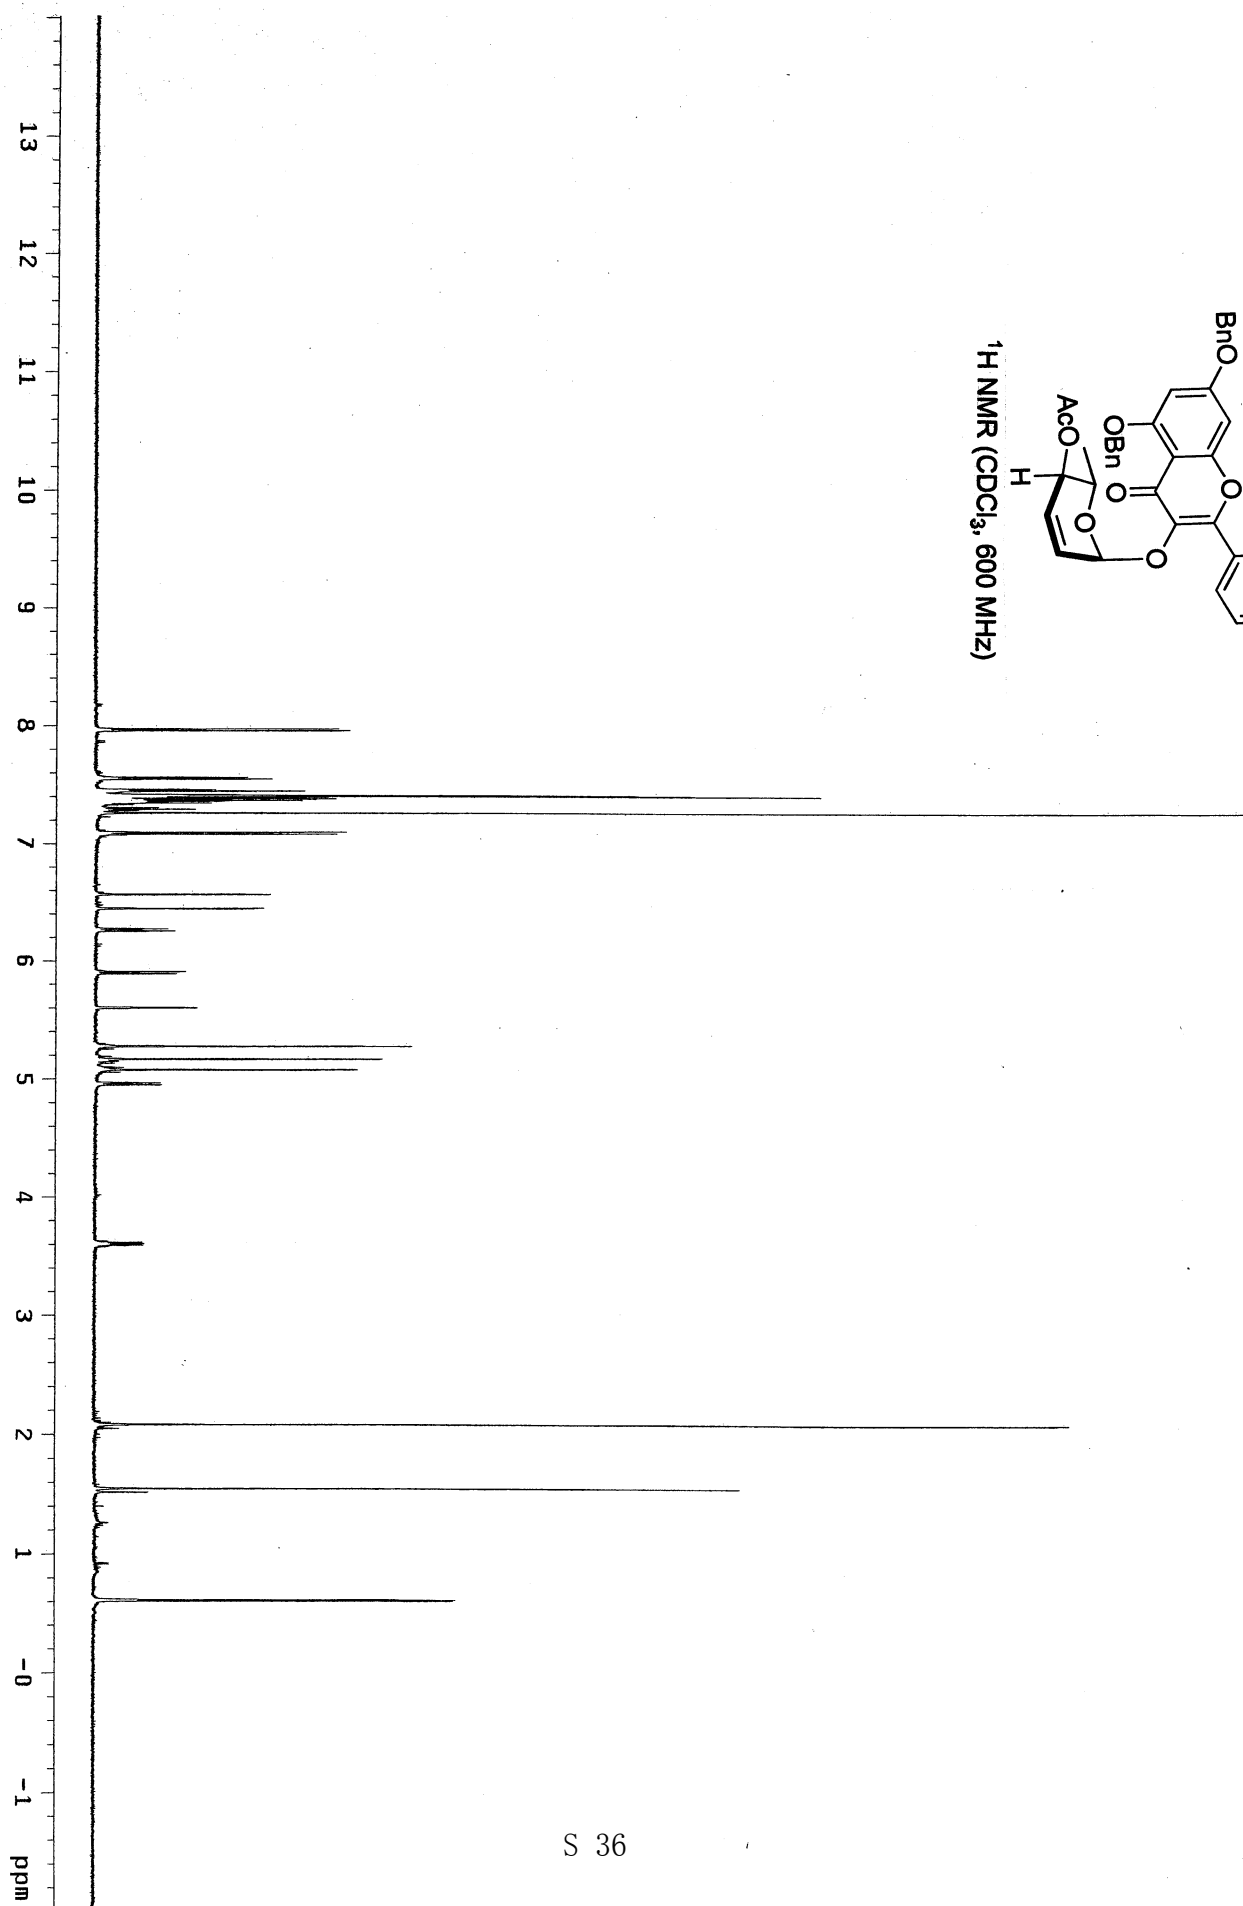

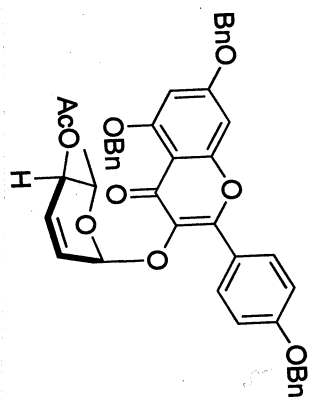

$^{13}\text{C}$  NMR ( $\text{CDCl}_3$ , 150 MHz)

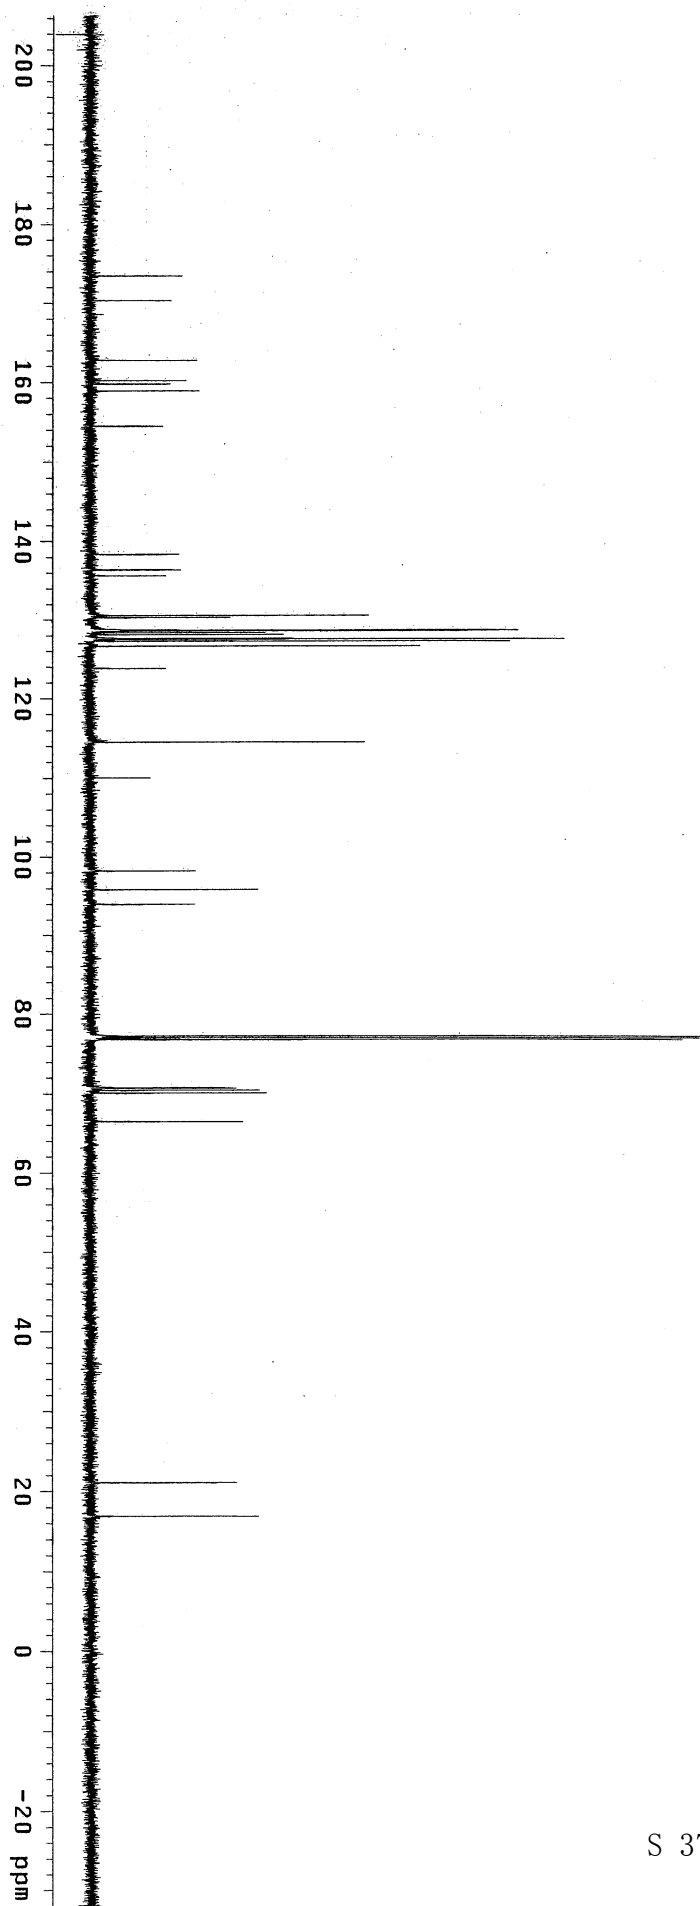

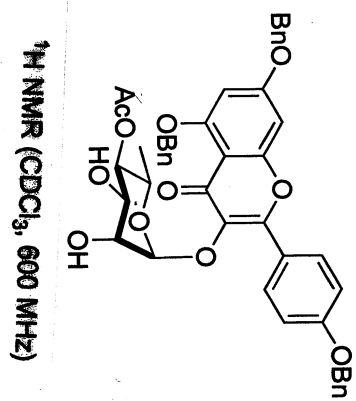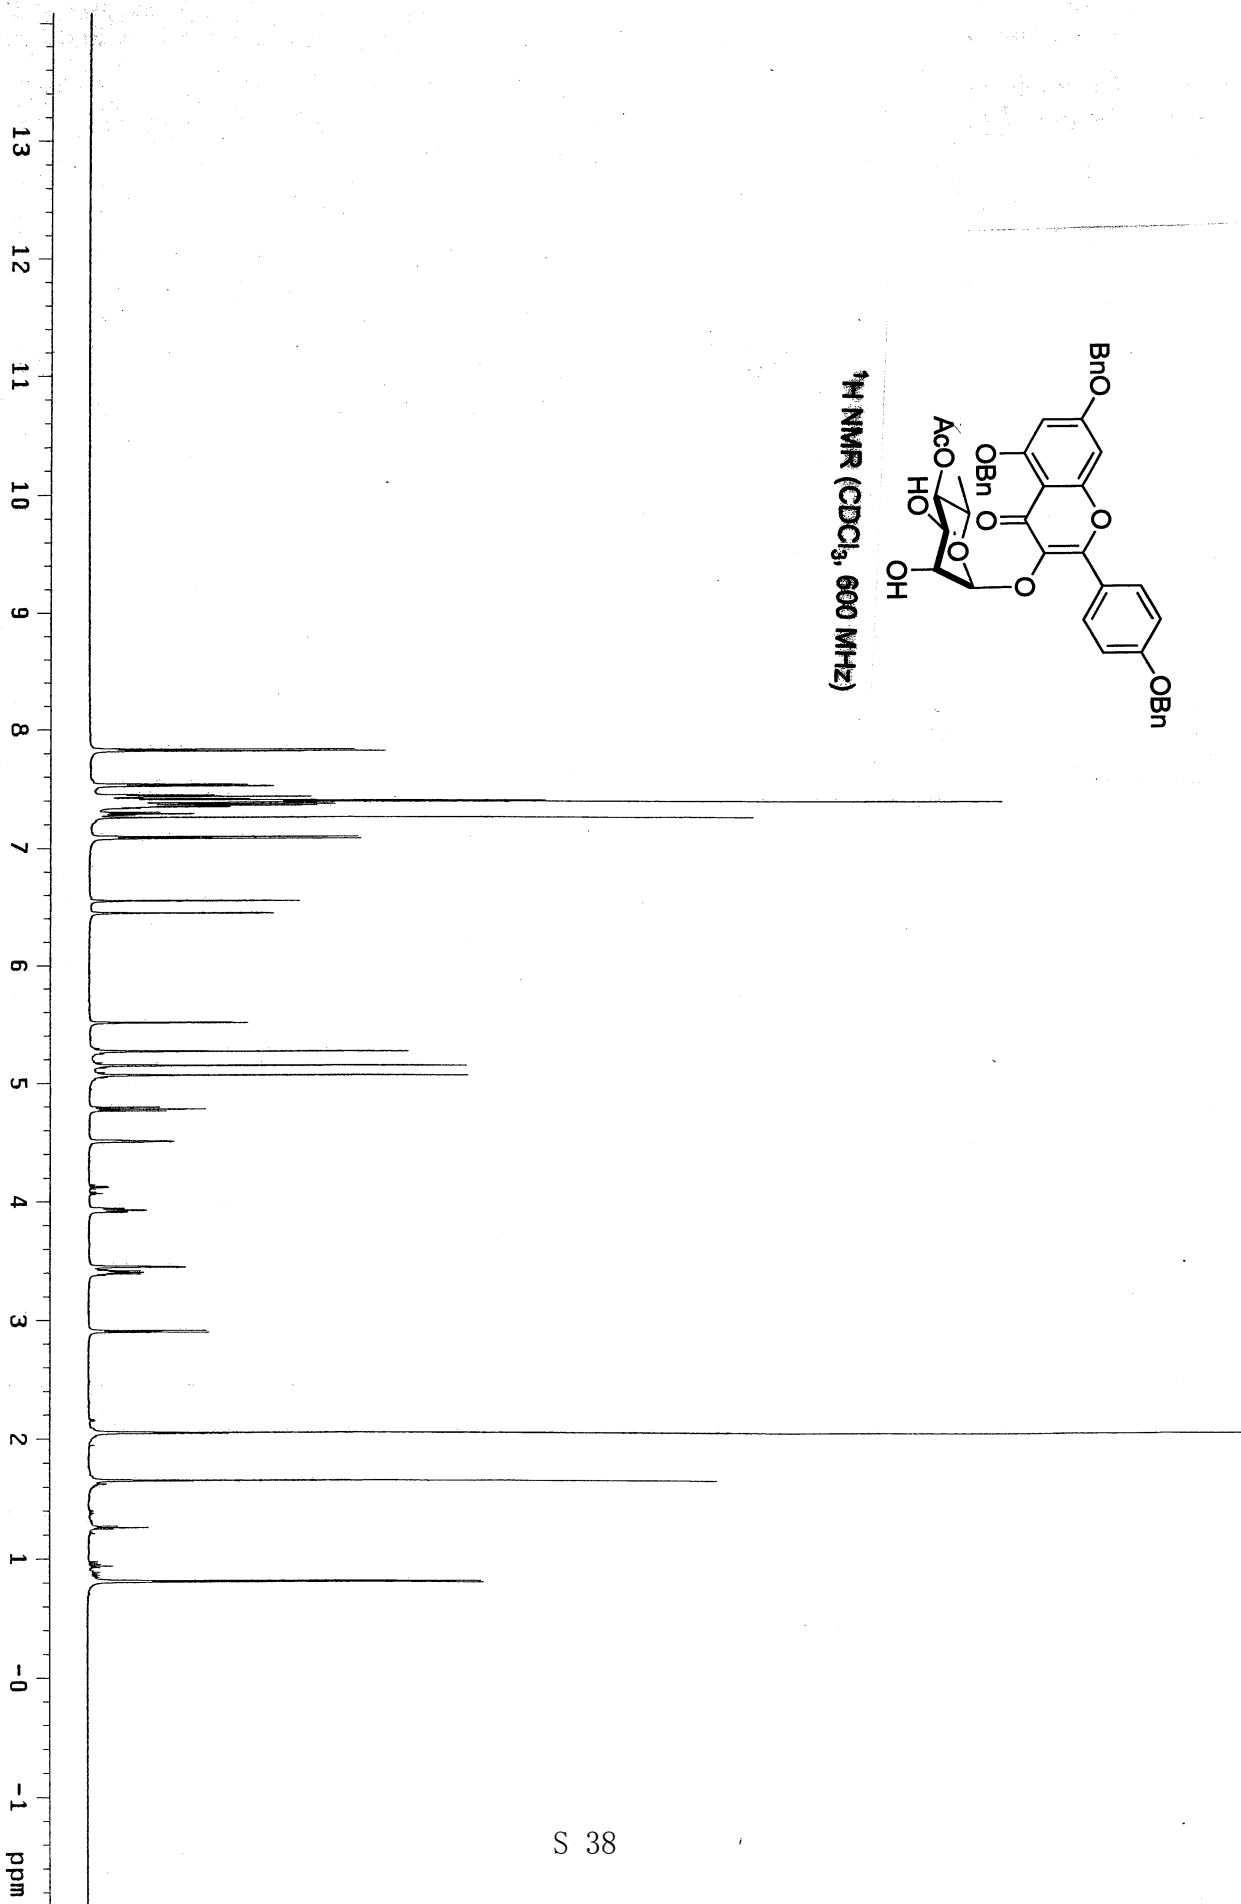

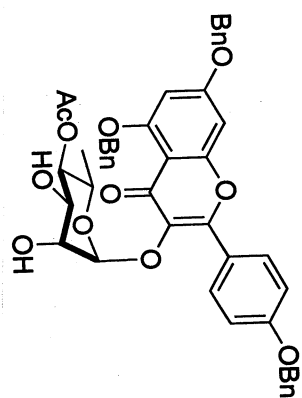

$^{13}\text{C}$  NMR ( $\text{CDCl}_3$ , 150 MHz)

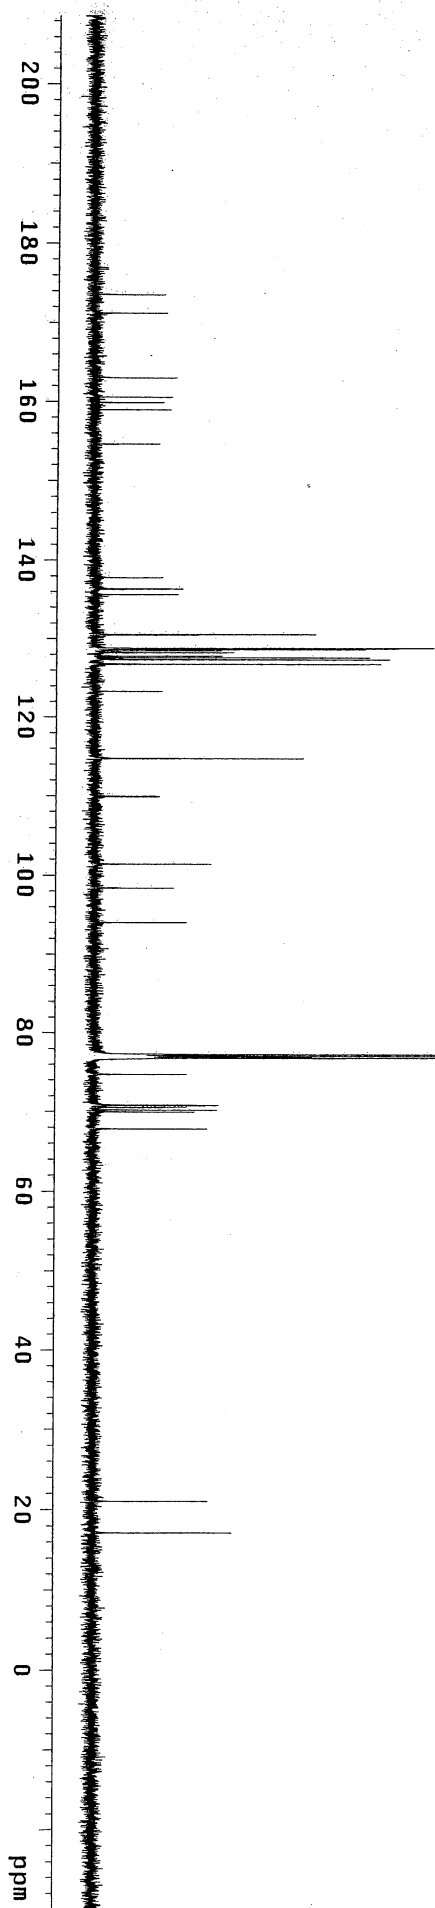

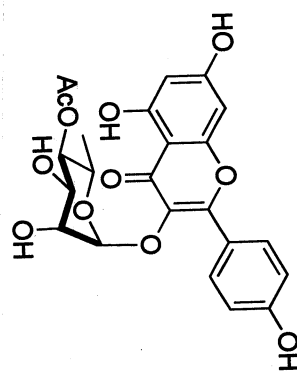

$^1\text{H}$  NMR (acetone- $d_6$ , 600 MHz)

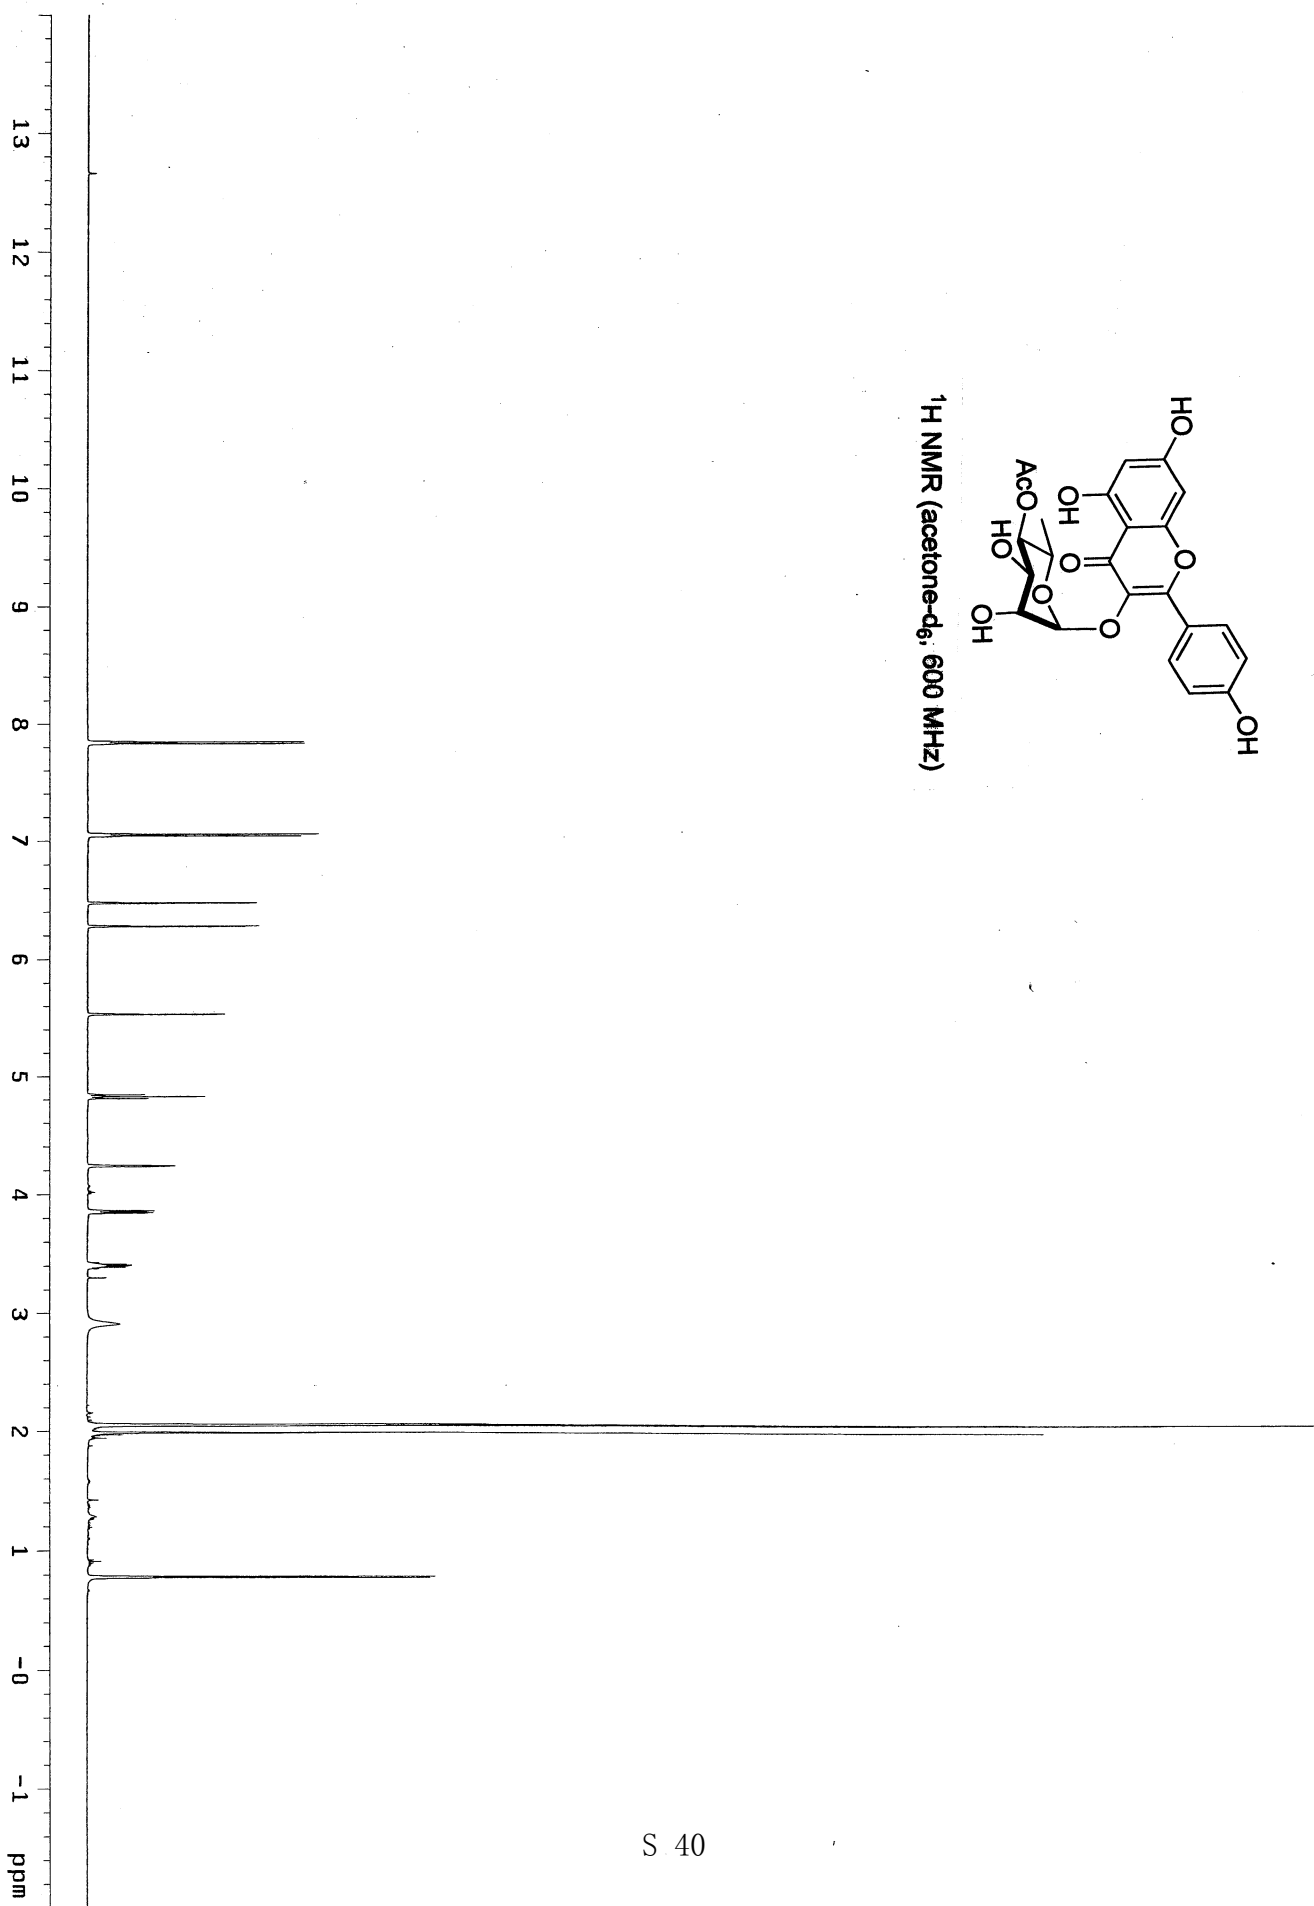

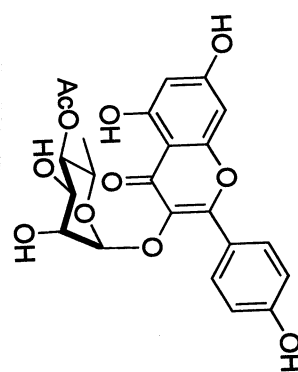

<sup>13</sup>C NMR (acetone-d<sub>6</sub>, 150 MHz)

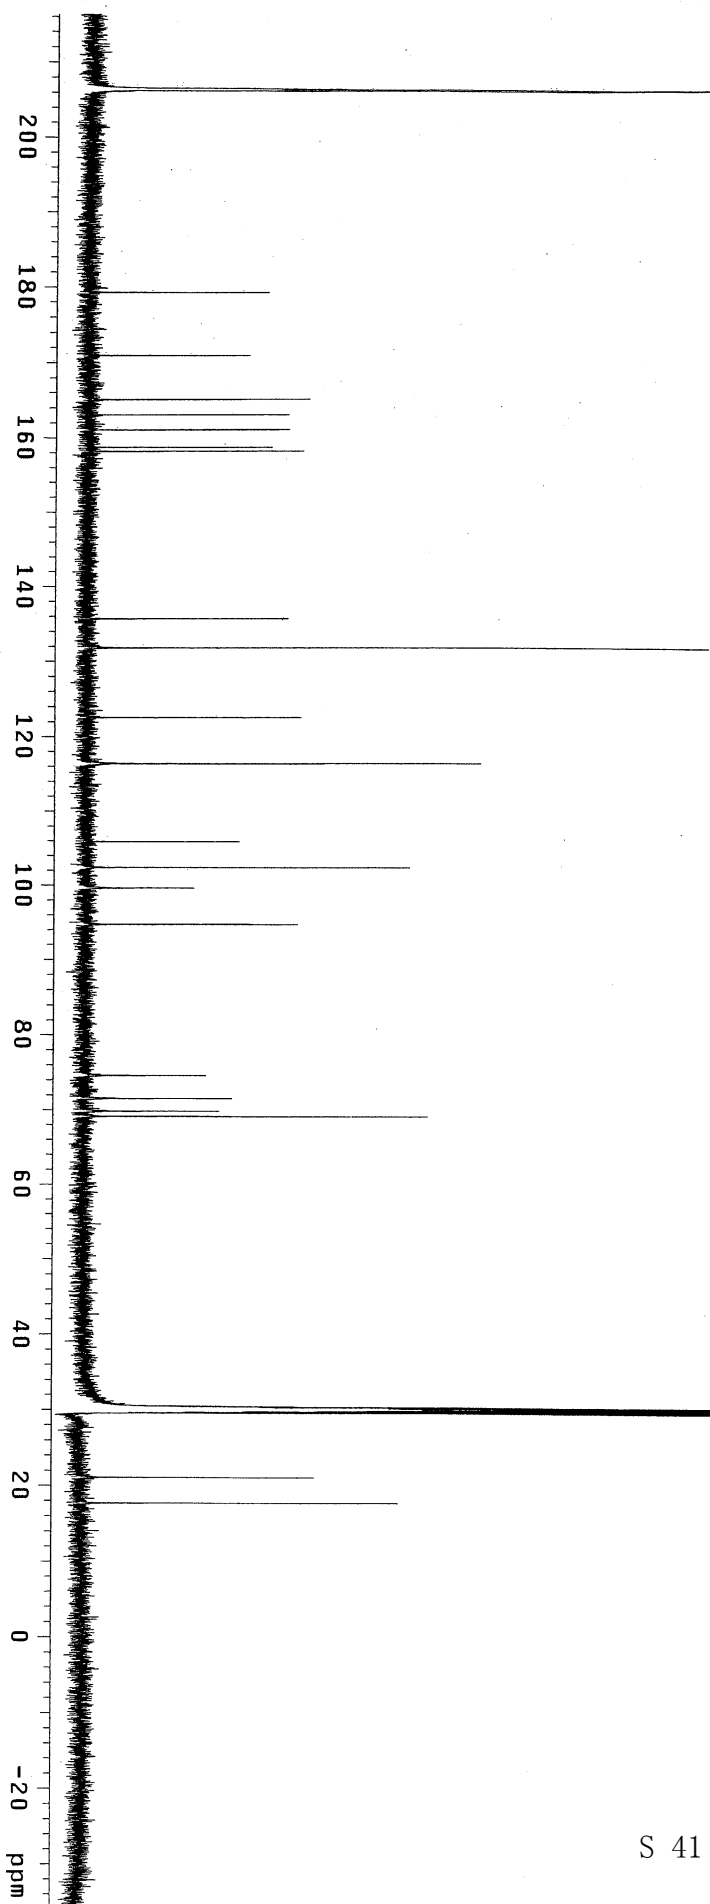

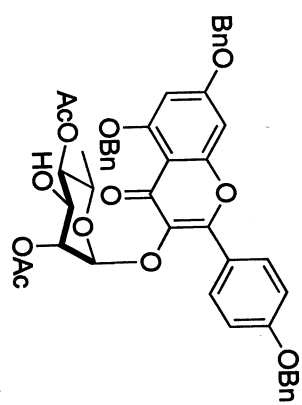

$^1\text{H}$  NMR ( $\text{CDCl}_3$ , 600 MHz)

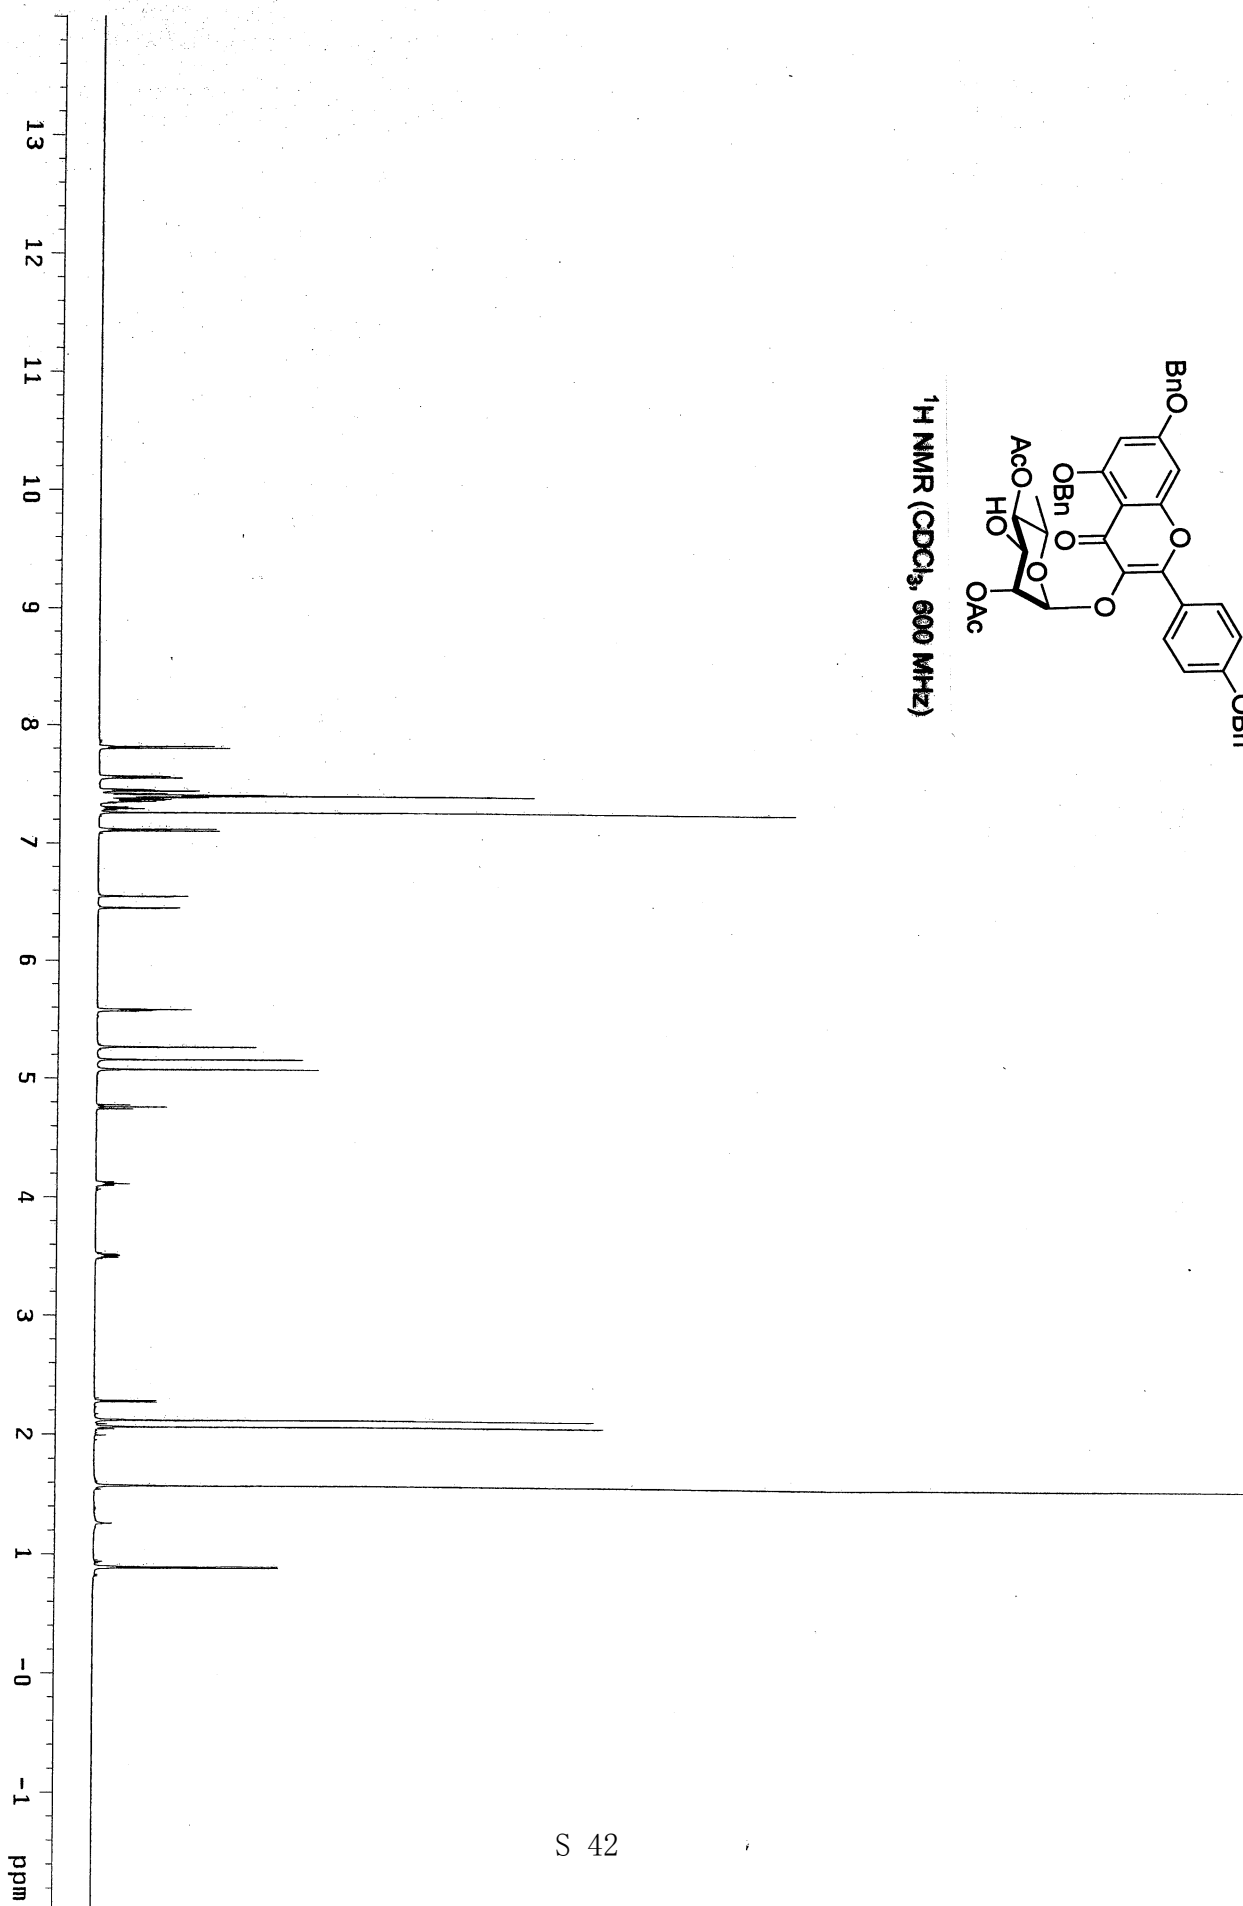

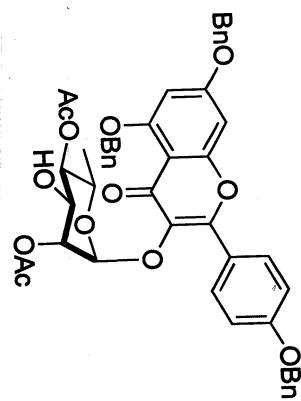

$^{13}\text{C}$  NMR ( $\text{CDCl}_3$ , 150 MHz)

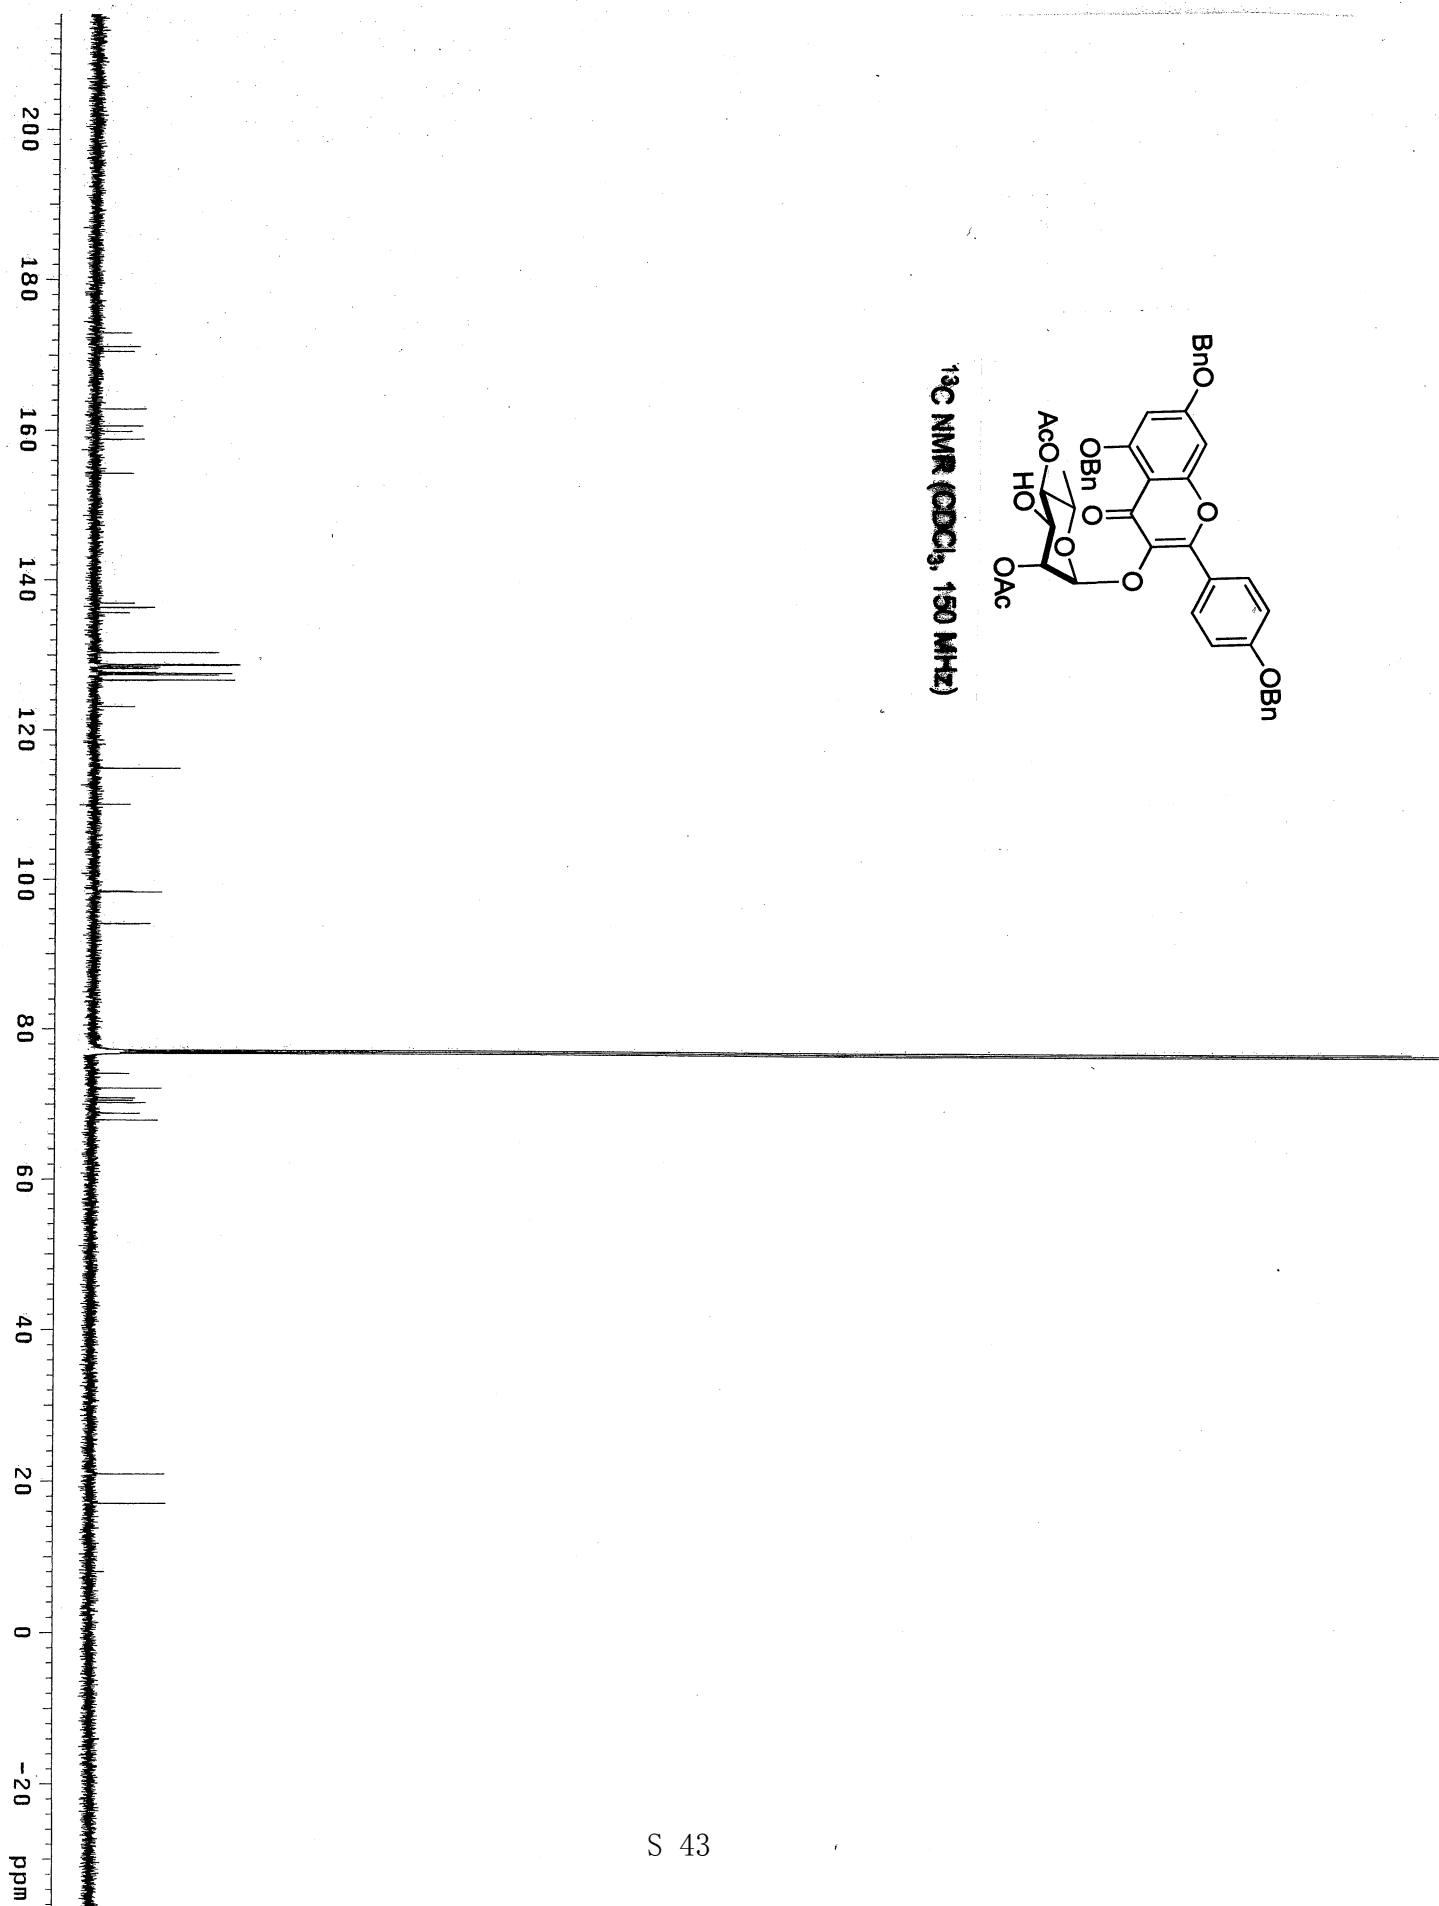

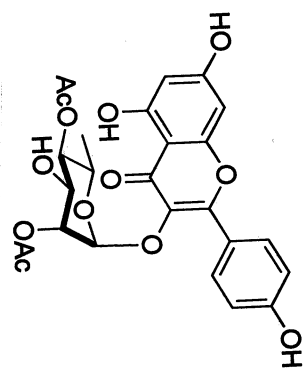

$^1\text{H}$  NMR (acetone- $d_6$ , 600 MHz)

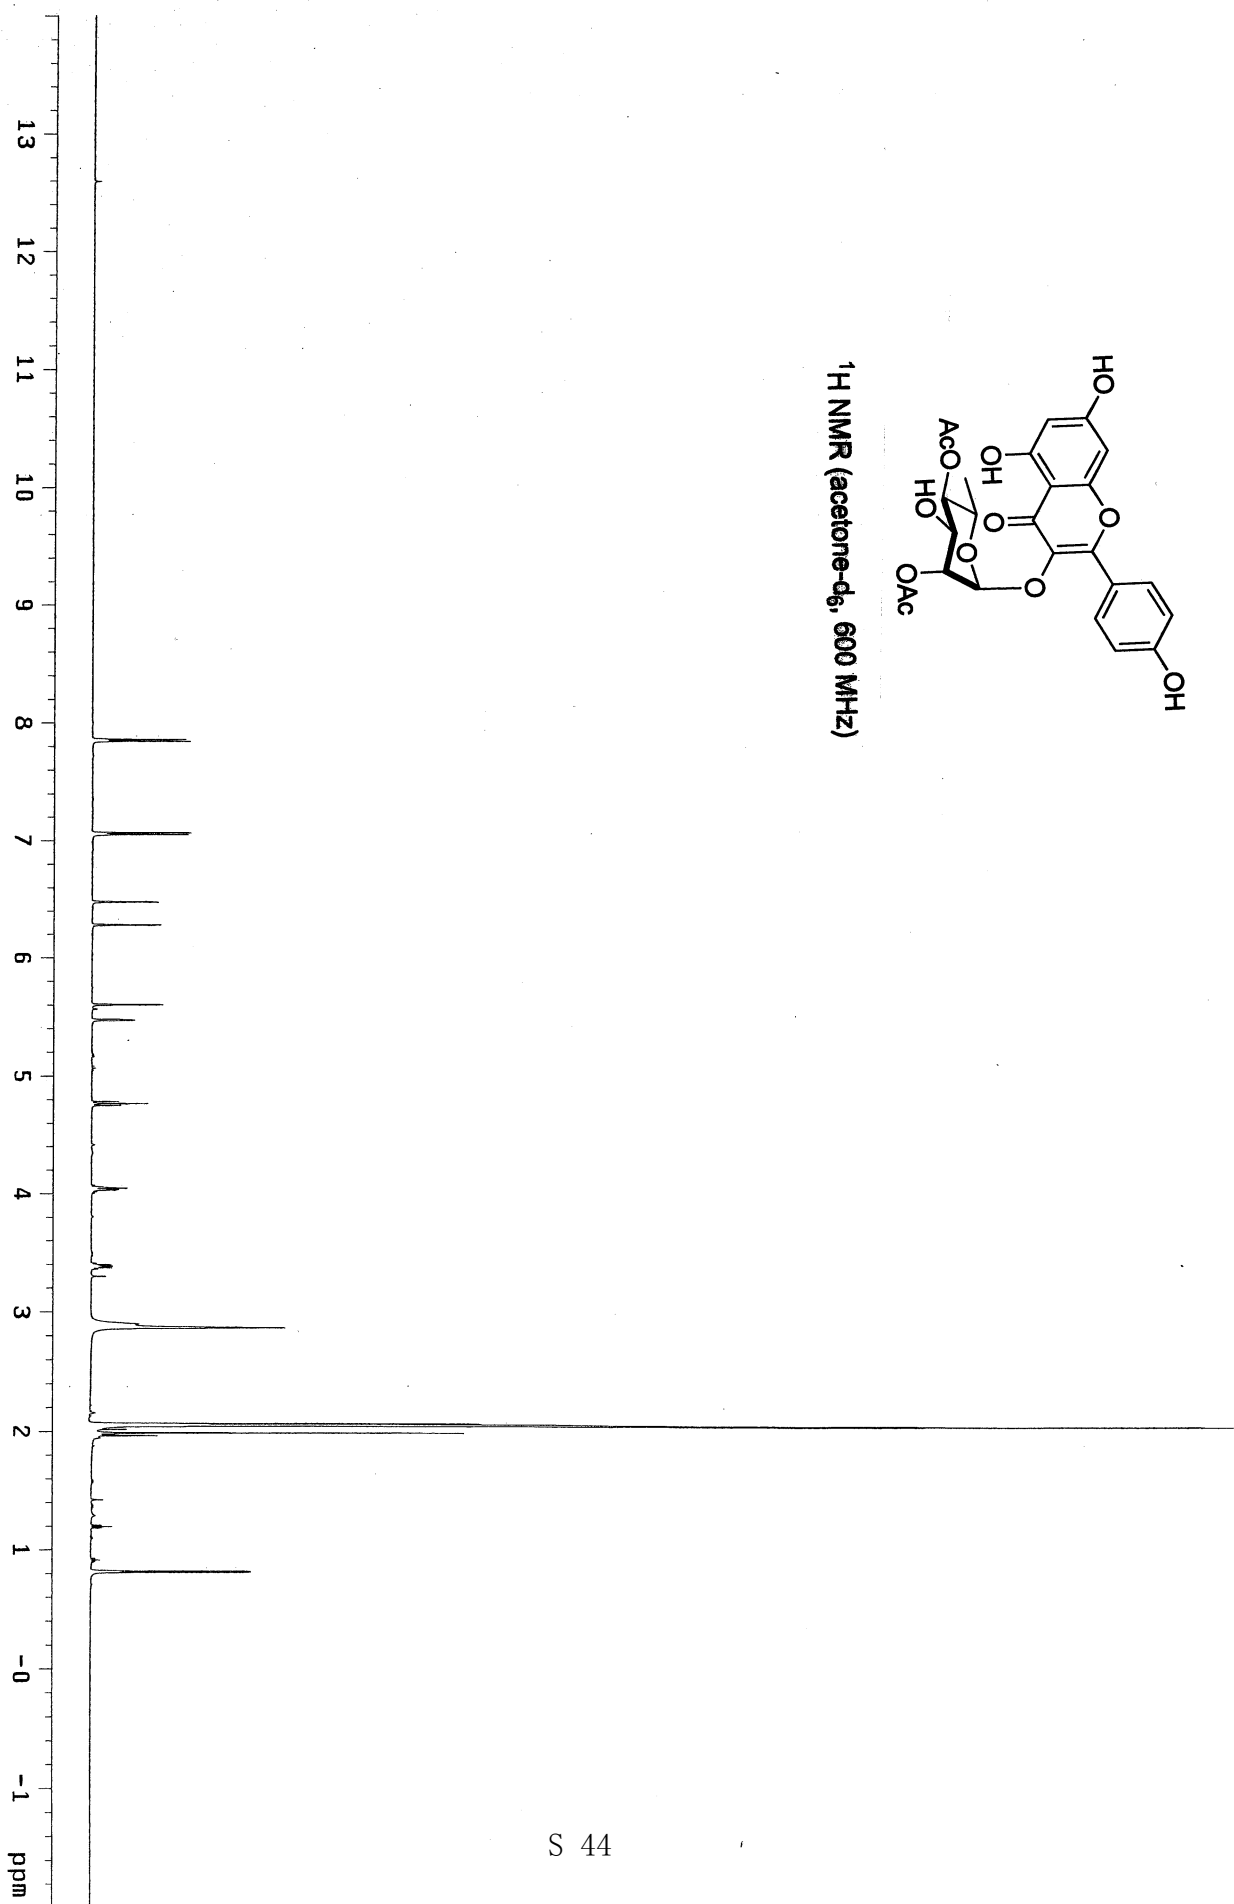

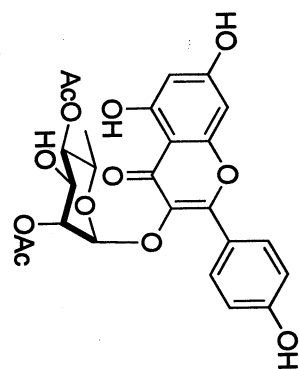

$^{13}\text{C}$  NMR (acetone- $d_6$ , 150 MHz)

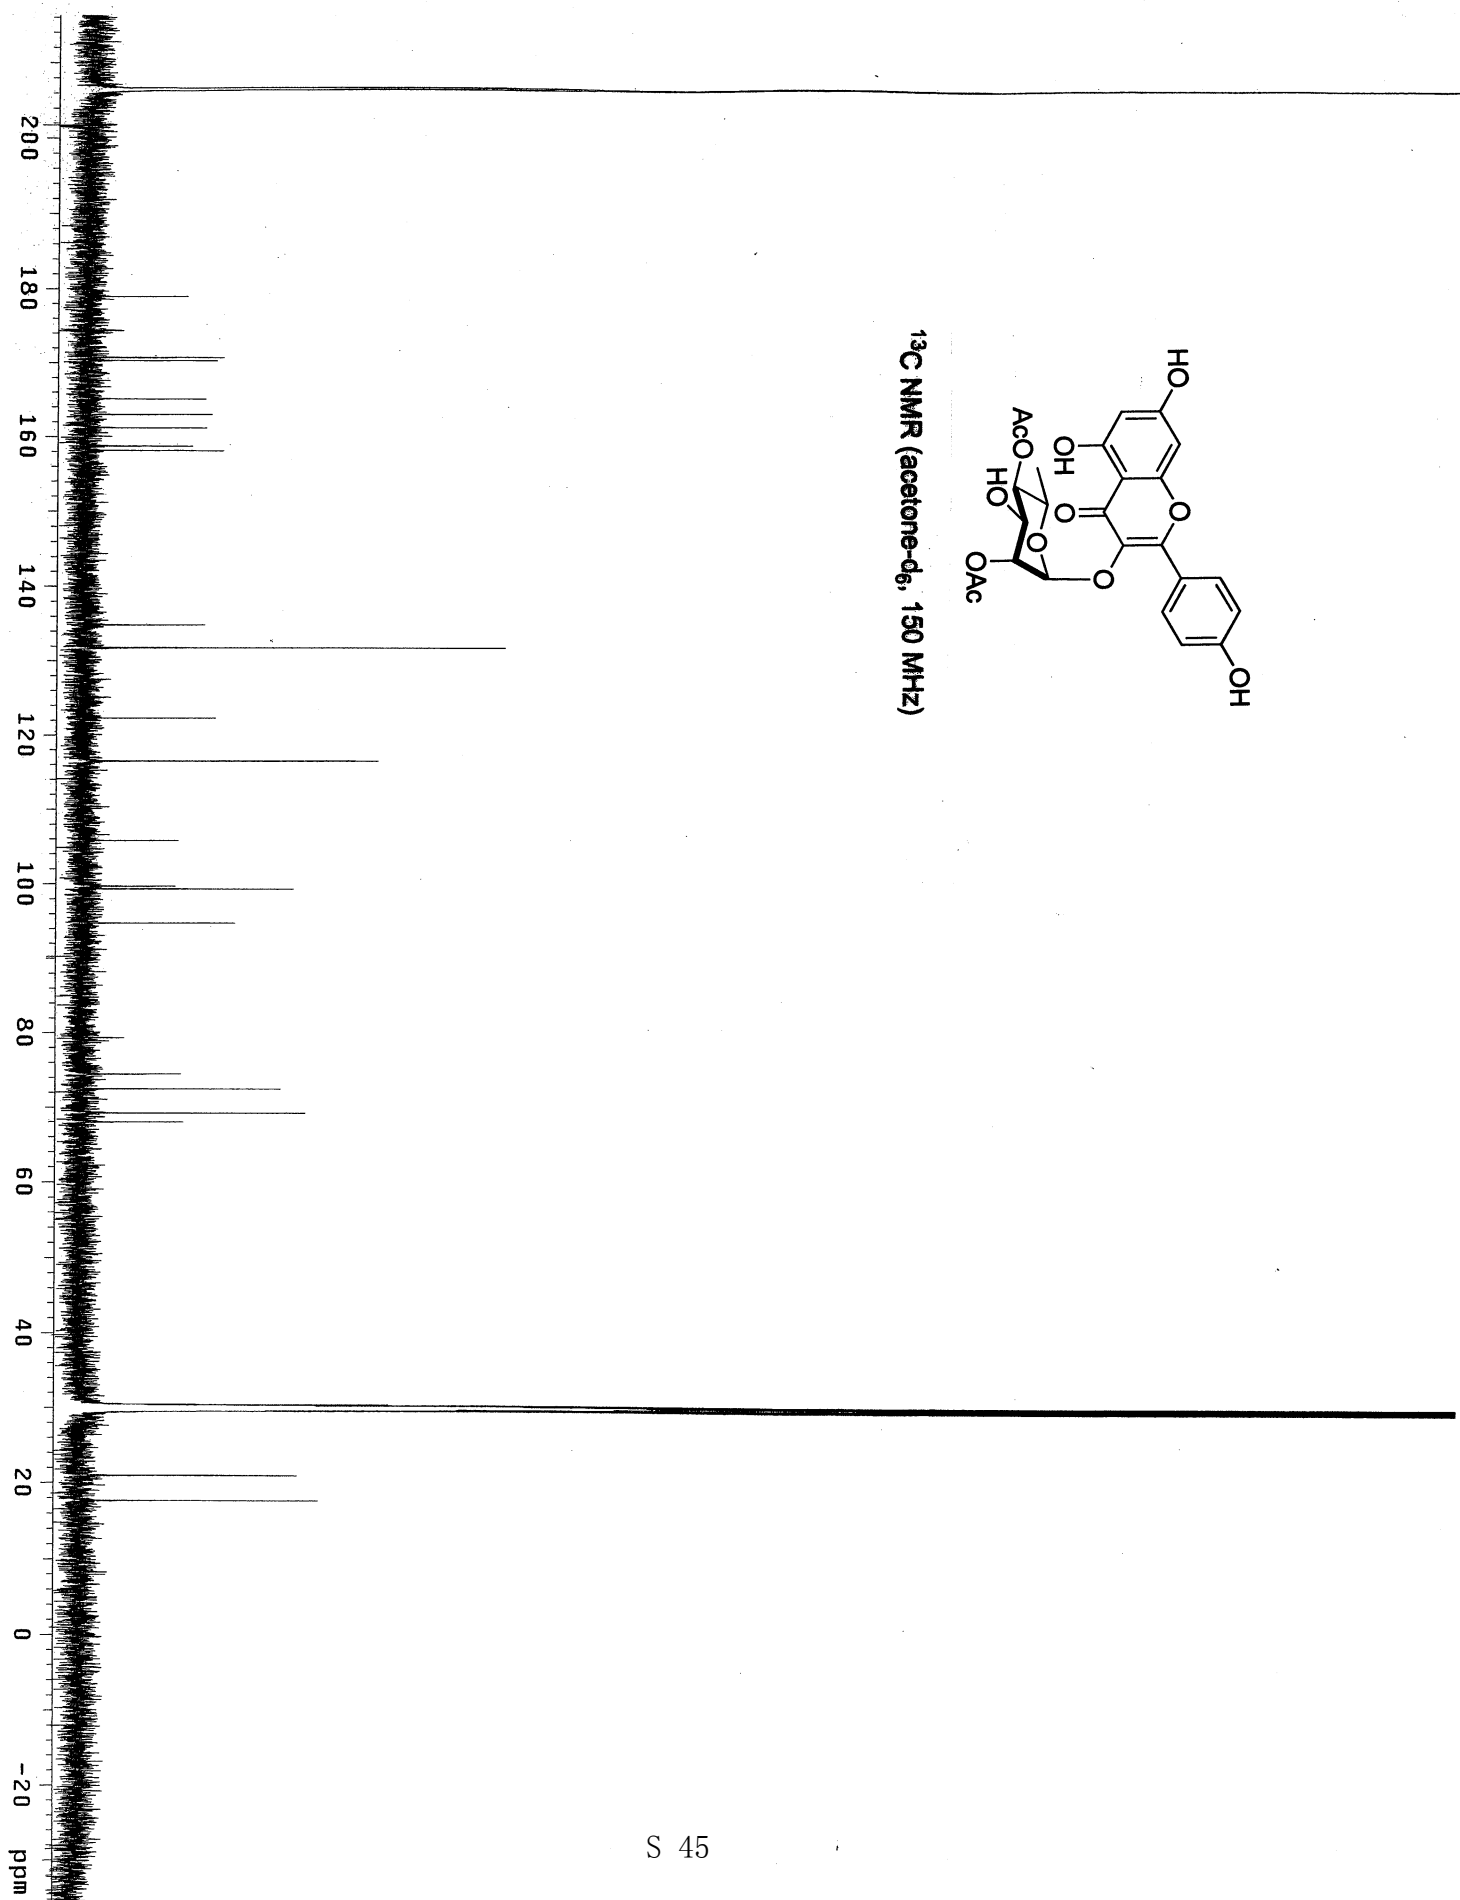

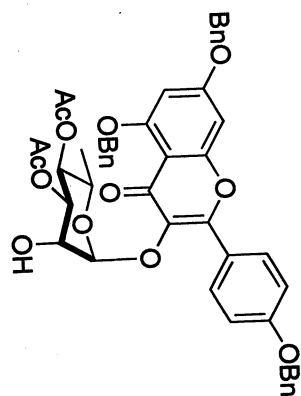

$^1\text{H}$  NMR ( $\text{CDCl}_3$ , 600 MHz)

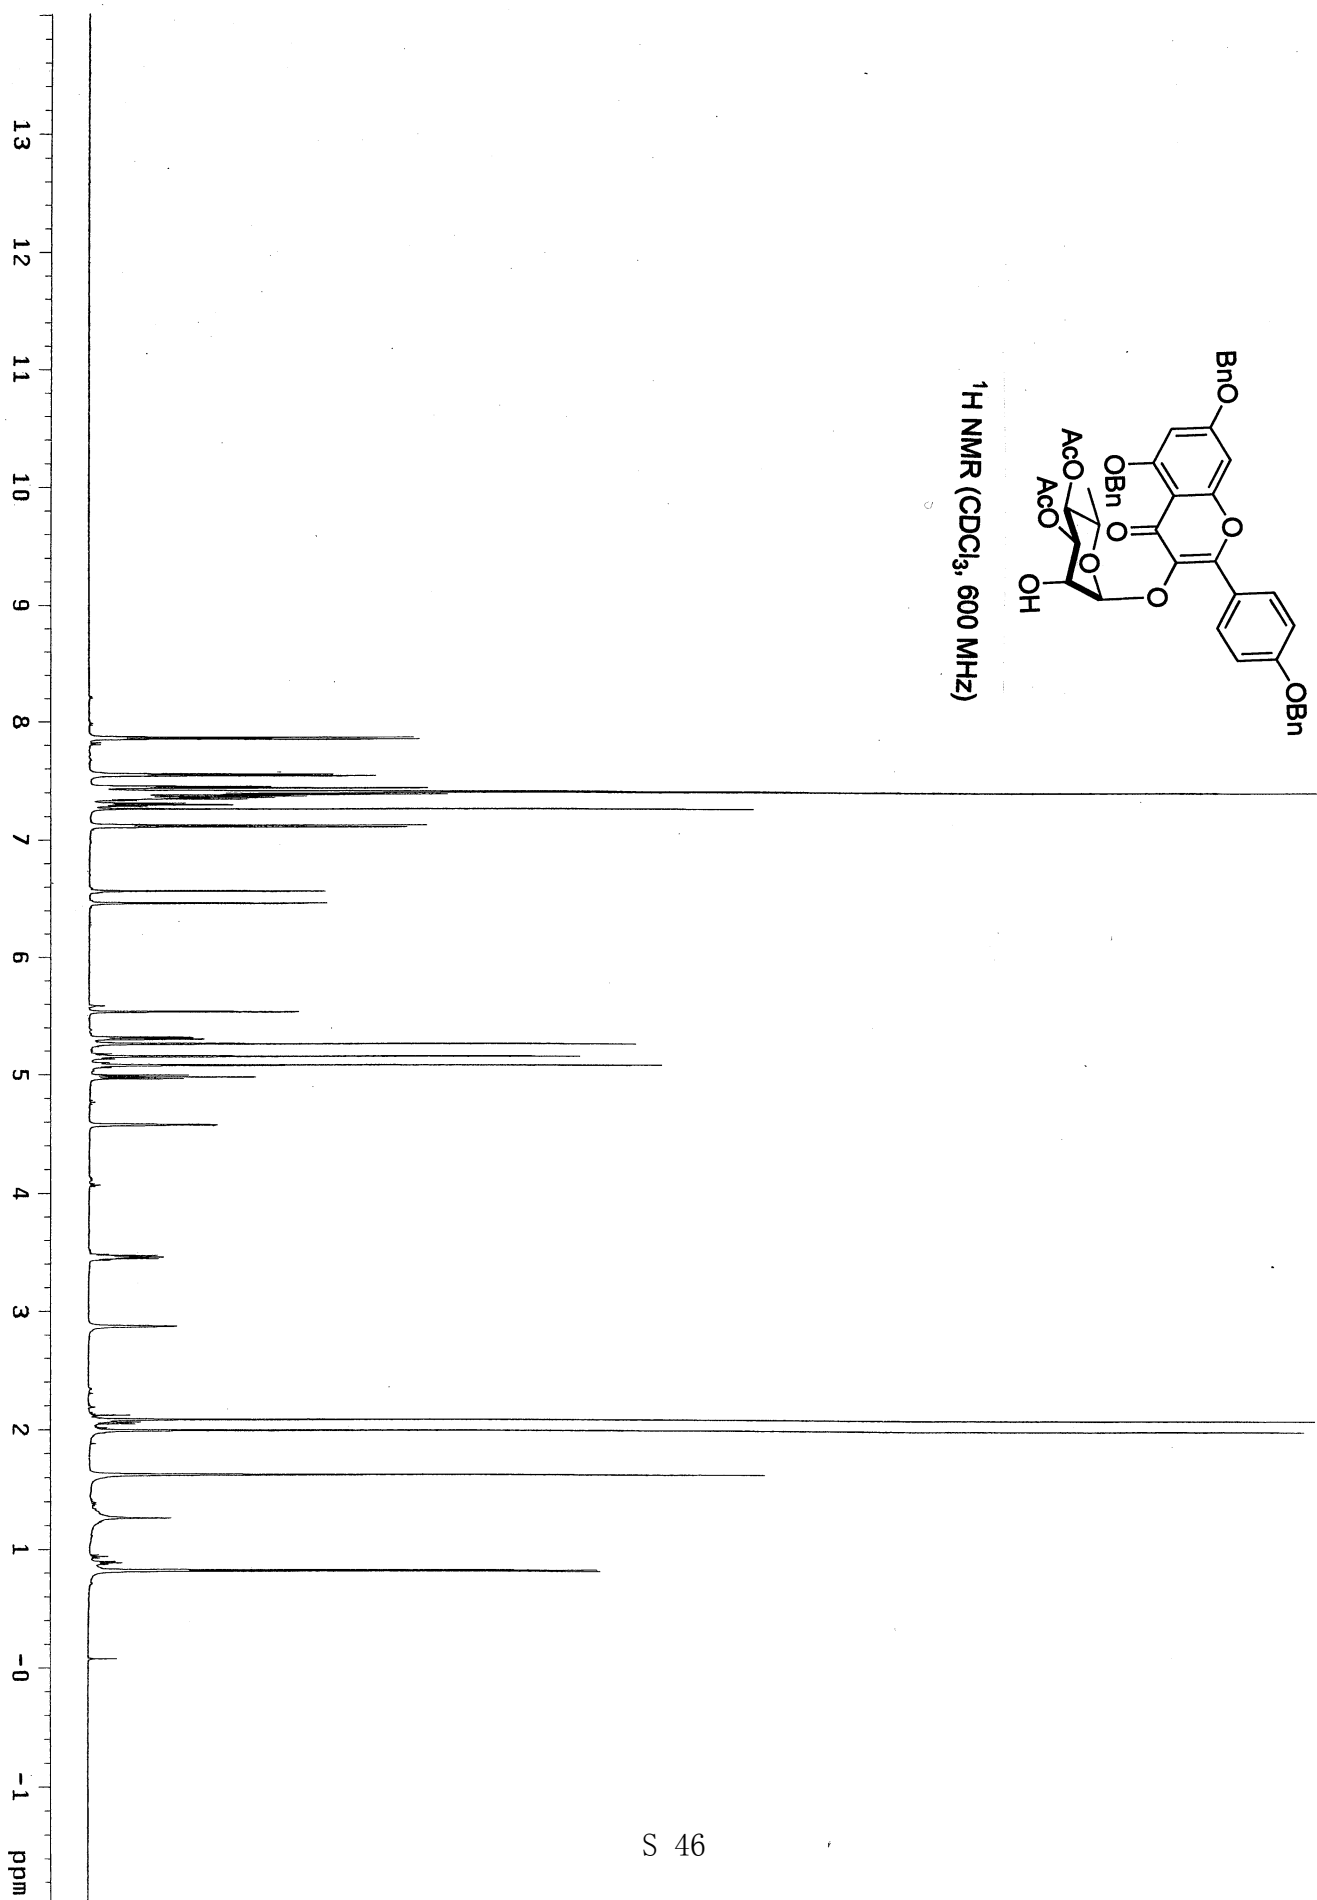

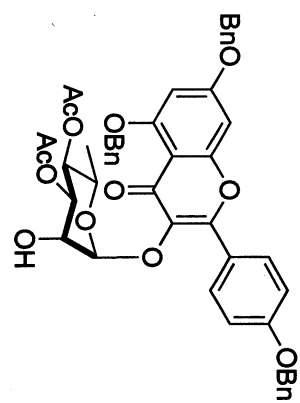

$^{13}\text{C}$  NMR ( $\text{CDCl}_3$ , 150 MHz)

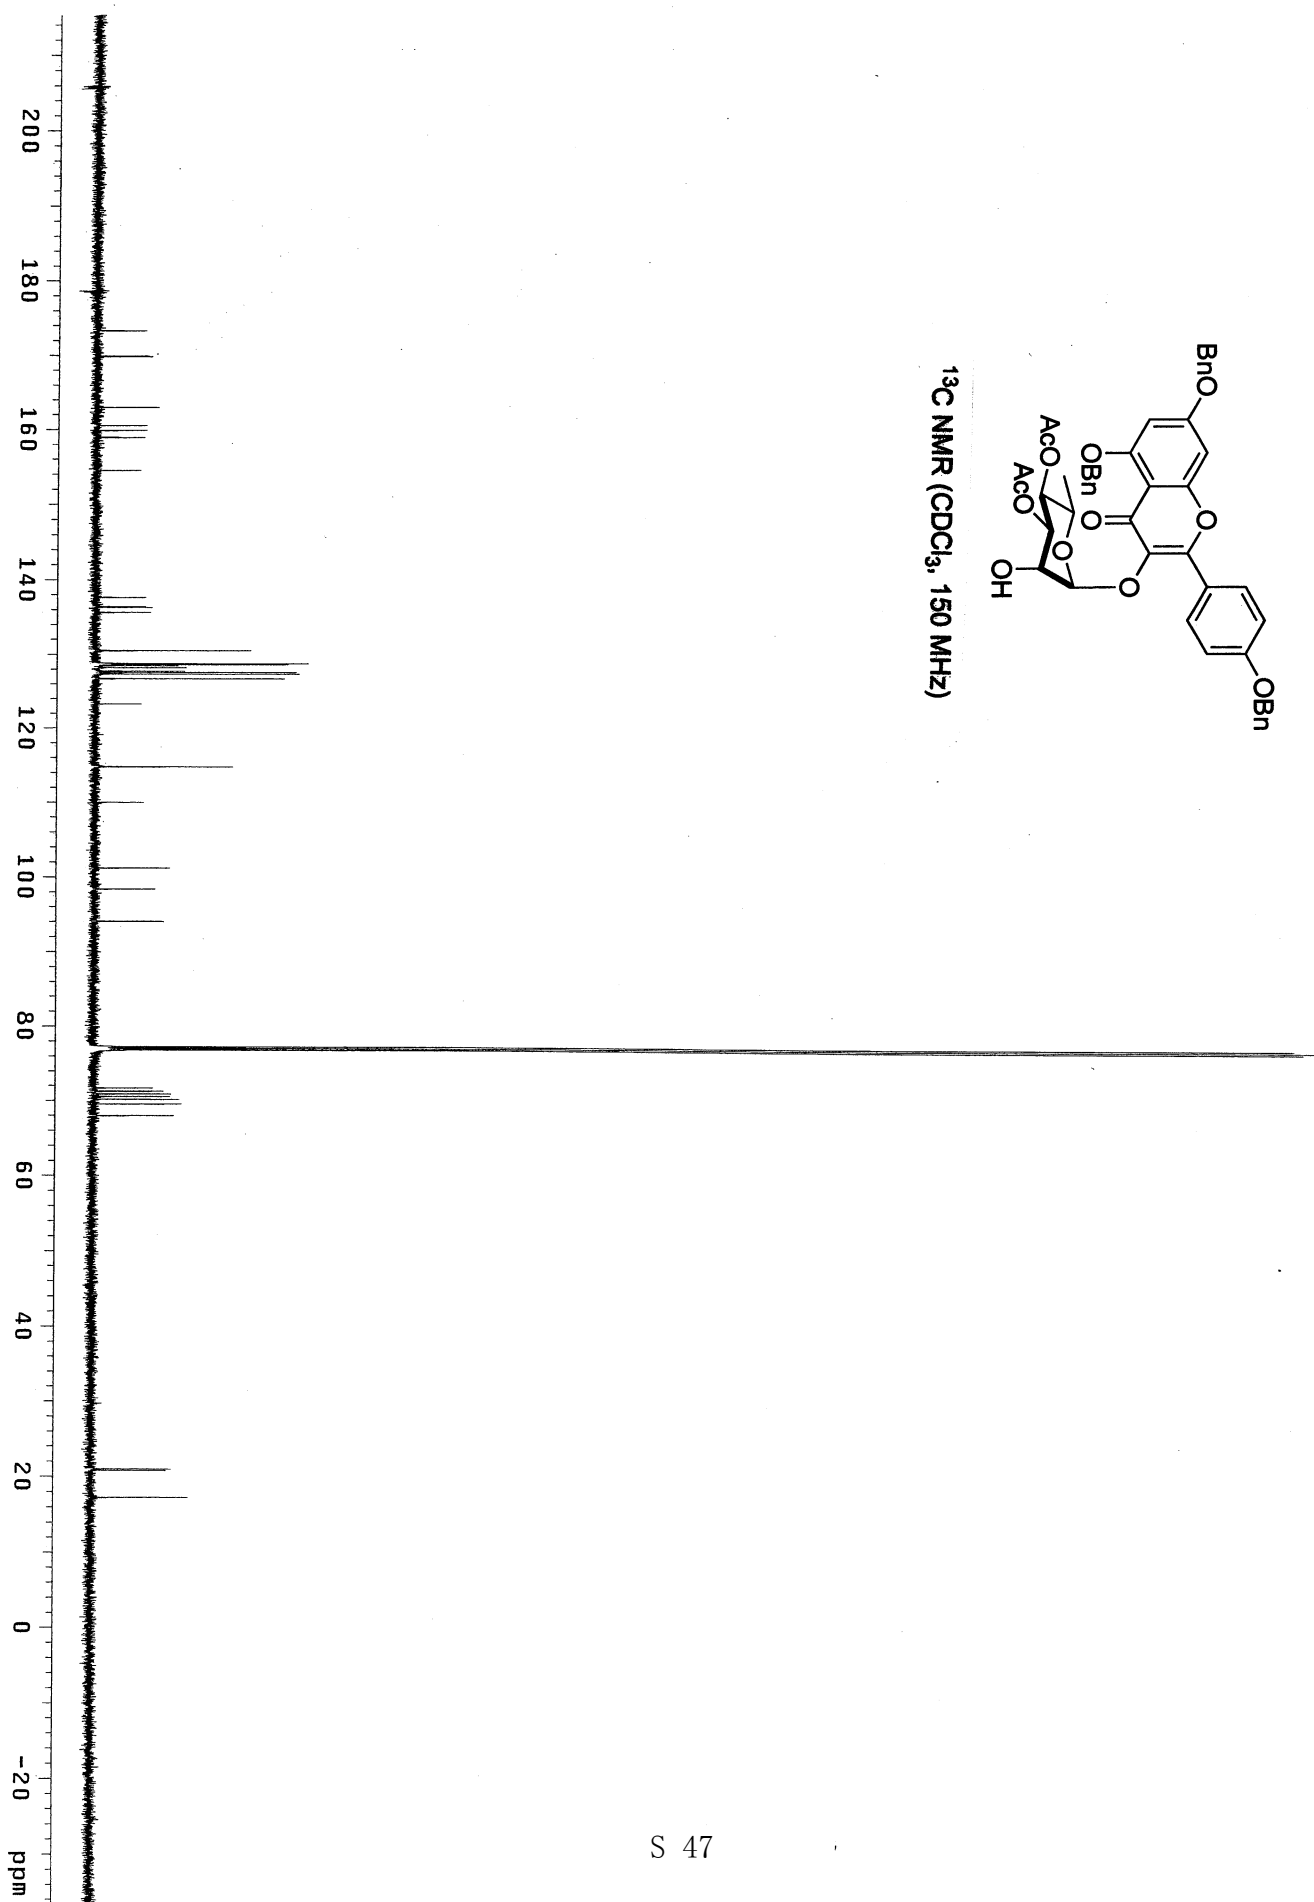

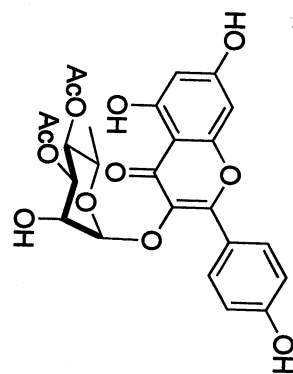

<sup>1</sup>H NMR (acetone-d<sub>6</sub>, 600 MHz)

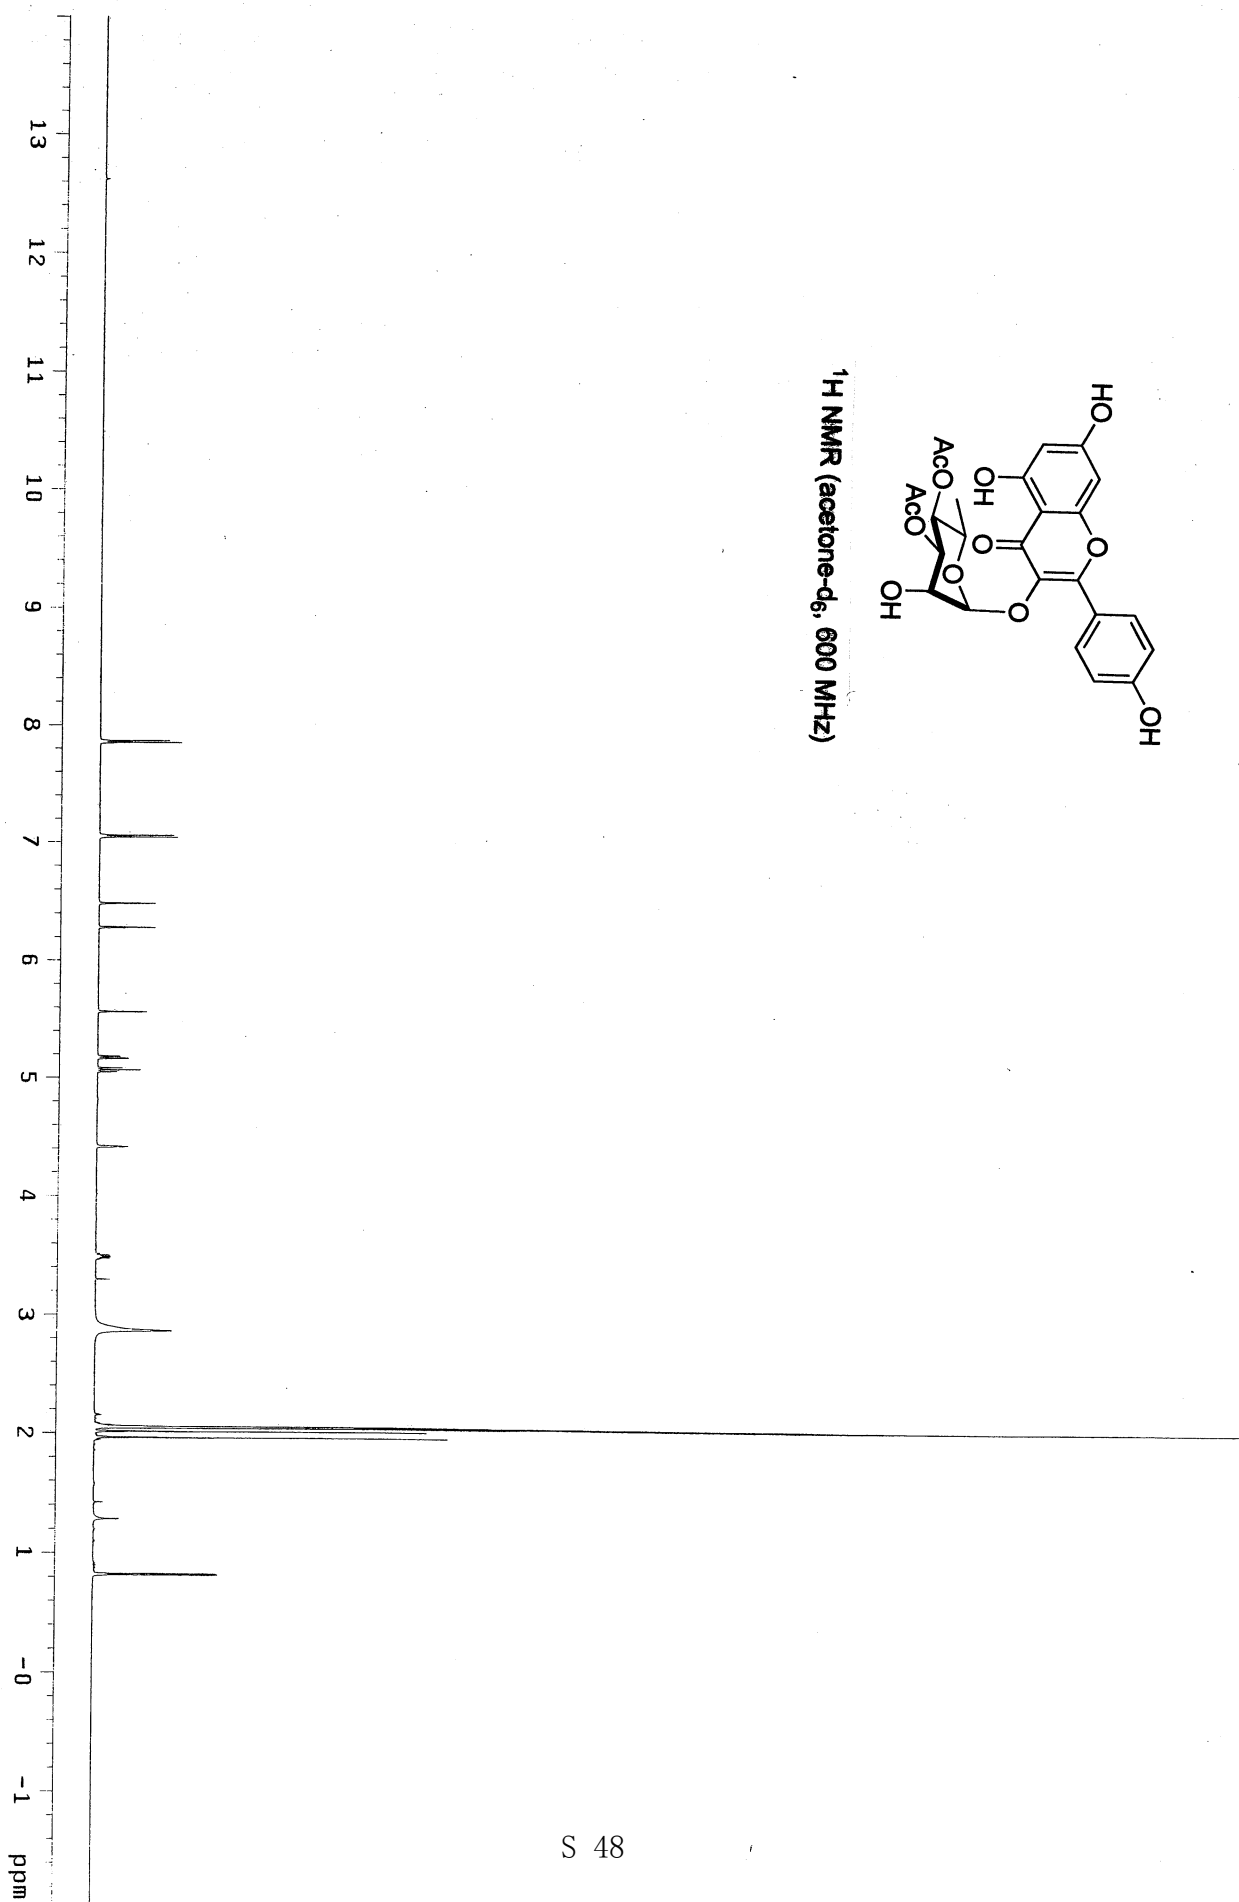

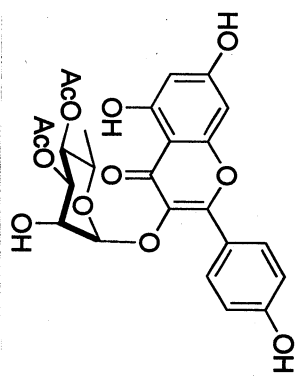

$^{13}\text{C}$  NMR (acetone- $d_6$ , 150 MHz)

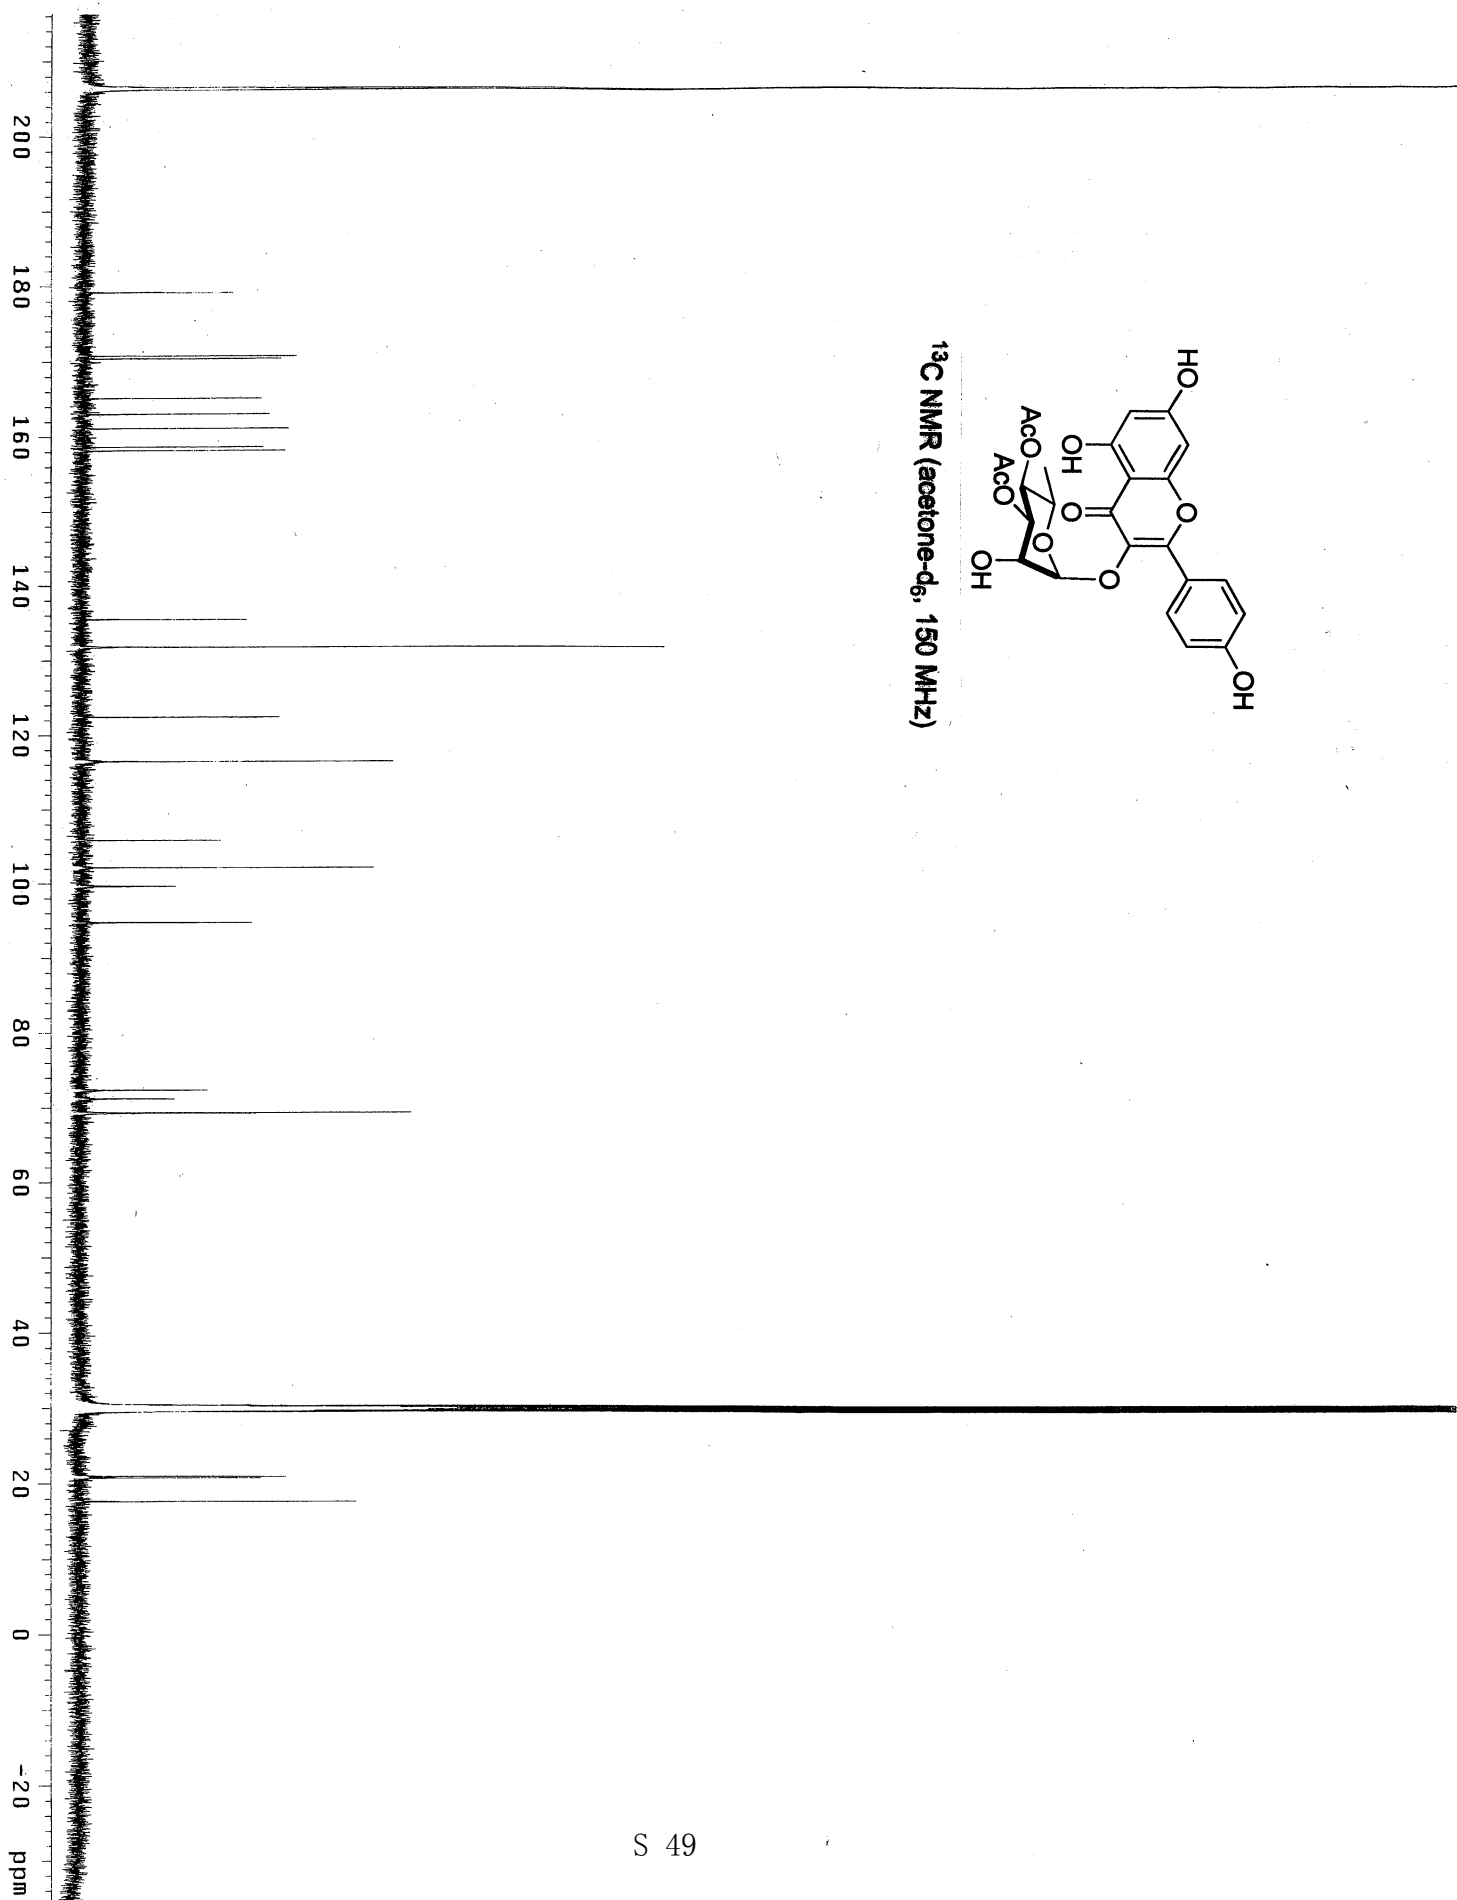

Supplement: NIHMS63826-supplement-1si20060822_05.pdf [file NIHMS63826-supplement-1si20060822_05.pdf]
